# Supplementary material for: Contiguous and complete assemblies of Blastocystis gut microbiome–associated protists reveal evolutionary diversification to host ecology
Source: HighWire-hosted journal article supplement (doi:10.1101/gr.279080.124), 2025-04-22
Supplement: Supplemental_Table_S5.xlsx [file Supplemental_Table_S5.xlsx]

## Sheet: all_iprs
Supplemental Table S5. Percentage of high alien index genes per genome with poly(A) purified RNA-seq expression support.
IPR	Annot	Annotation	Cafeteria burkhardae	Proteromonas lacertae	P. lacertae, scaled by median IPR counts in Blastocystis to account for proteome size differences	Rus-B	Hermann's	Rus-S	ST1-NandII	ST1-JDR	ST3-DL	ST3-NMH	ST4-BT1
IPR027417	P-loop containing nucleoside triphosphate hydrolase		505	1422	625.68	460	390	357	386	402	358	391	420
IPR036770	Ankyrin repeat-containing domain superfamily		285	131	57.64	39	30	31	36	42	34	38	43
IPR002110	Ankyrin repeat		277	117	51.48	34	25	26	35	42	32	36	42
IPR011009	Protein kinase-like domain superfamily		216	1227	539.88	198	179	179	337	381	167	167	173
IPR015943	WD40/YVTN repeat-like-containing domain superfamily		182	329	144.76	141	144	123	163	177	143	151	168
IPR000719	Protein kinase domain		180	1100	484	165	139	137	298	330	130	139	139
IPR011992	EF-hand domain pair	Calcium	152	296	130.24	33	36	23	42	46	39	43	47
IPR001680	WD40 repeat		150	265	116.6	109	113	95	124	130	111	116	130
IPR011990	Tetratricopeptide-like helical domain superfamily		145	321	141.24	87	105	75	104	116	99	105	118
IPR036322	WD40-repeat-containing domain superfamily		135	323	142.12	142	145	121	168	167	140	142	172
IPR016024	Armadillo-type fold		133	373	164.12	185	160	143	206	218	184	196	199
IPR003593	AAA+ ATPase domain		129	231	101.64	99	76	69	98	105	87	100	100
IPR036291	NAD(P)-binding domain superfamily		113	125	55	59	54	45	95	108	78	81	92
IPR002048	EF-hand domain	Calcium	111	123	54.12	14	16	9	21	21	17	18	22
IPR029058	Alpha/Beta hydrolase fold		110	83	36.52	45	38	36	25	30	23	25	28
IPR029063	S-adenosyl-L-methionine-dependent methyltransferase superfamily		110	264	116.16	78	77	60	80	75	60	72	72
IPR011989	Armadillo-like helical		109	262	115.28	127	111	105	138	150	132	141	139
IPR032675	Leucine-rich repeat domain superfamily		95	727	319.88	66	55	53	366	404	211	204	247
IPR013783	Immunoglobulin-like fold		86	456	200.64	201	129	151	113	134	106	108	217
IPR011993	PH-like domain superfamily		82	168	73.92	56	41	43	47	52	46	55	59
IPR001650	Helicase, C-terminal domain-like		80	165	72.6	74	67	61	69	65	62	71	77
IPR013083	Zinc finger, RING/FYVE/PHD-type		76	345	151.8	143	102	122	120	114	90	110	117
IPR014001	Helicase superfamily 1/2, ATP-binding domain		74	150	66	76	56	55	65	62	60	72	74
IPR036249	Thioredoxin-like superfamily		74	108	47.52	62	46	43	68	71	63	70	80
IPR038765	Papain-like cysteine peptidase superfamily		72	294	129.36	69	59	55	63	70	80	101	80
IPR036961	Kinesin motor domain superfamily	Kinesin	59	138	60.72	14	9	15	12	12	11	11	17
IPR012340	Nucleic acid-binding, OB-fold		58	112	49.28	68	64	51	75	82	70	72	78
IPR035979	RNA-binding domain superfamily		58	173	76.12	103	97	80	107	116	99	112	126
IPR012677	Nucleotide-binding alpha-beta plait domain superfamily		58	168	73.92	103	95	77	109	119	94	108	127
IPR009072	Histone-fold		57	45	19.8	28	22	23	22	20	25	27	27
IPR036259	MFS transporter superfamily		57	121	53.24	109	72	92	60	78	57	54	55
IPR014756	Immunoglobulin E-set		56	45	19.8	11	12	11	14	14	16	17	12
IPR005225	Small GTP-binding protein domain		55	109	47.96	58	50	41	61	59	50	57	61
IPR036388	Winged helix-like DNA-binding domain superfamily		54	84	36.96	52	38	38	51	47	39	47	48
IPR011545	DEAD/DEAH box helicase domain		54	129	56.76	52	50	45	53	51	50	55	56
IPR019734	Tetratricopeptide repeat		53	198	87.12	41	43	35	42	41	42	46	49
IPR000504	RNA recognition motif domain		52	152	66.88	86	80	66	86	93	79	88	95
IPR043502	DNA/RNA polymerase superfamily		51	238	104.72	31	11	15	6	12	8	7	30
IPR036890	Histidine kinase/HSP90-like ATPase superfamily		50	17	7.48	15	12	13	10	12	13	12	13
IPR001849	Pleckstrin homology domain		50	111	48.84	29	23	12	20	24	22	27	28
IPR017853	Glycoside hydrolase superfamily		50	69	30.36	70	52	44	22	25	18	21	27
IPR001202	WW domain		49	54	23.76	11	9	9	11	11	6	9	12
IPR036412	HAD-like superfamily		49	91	40.04	44	38	34	45	49	41	44	49
IPR014710	RmlC-like jelly roll fold		48	99	43.56	8	4	5	6	9	8	8	6
IPR023214	HAD superfamily		48	94	41.36	43	38	34	46	50	43	45	49
IPR001752	Kinesin motor domain	Kinesin	47	134	58.96	14	9	13	11	11	10	9	14
IPR005821	Ion transport domain	Ion channel	46	36	15.84	4	7	7	1	1	1	0	0
IPR003439	ABC transporter-like, ATP-binding domain		46	129	56.76	32	34	29	25	28	30	32	29
IPR027640	Kinesin-like protein	Kinesin	45	121	53.24	9	4	8	10	8	9	8	13
IPR036188	FAD/NAD(P)-binding domain superfamily		45	37	16.28	17	20	18	20	19	16	19	18
IPR013785	Aldolase-type TIM barrel		45	64	28.16	43	36	26	36	39	27	31	31
IPR014729	Rossmann-like alpha/beta/alpha sandwich fold		45	60	26.4	40	39	35	39	40	36	38	39
IPR029071	Ubiquitin-like domain superfamily		44	66	29.04	59	47	44	43	48	36	47	47
IPR011006	CheY-like superfamily	Signal transduction, histidine kinase	43	15	6.6	2	1	1	0	1	0	0	2
IPR001611	Leucine-rich repeat		43	465	204.6	30	22	21	22	20	26	25	25
IPR036390	Winged helix DNA-binding domain superfamily		43	98	43.12	45	33	35	47	45	31	43	46
IPR009091	Regulator of chromosome condensation 1/beta-lactamase-inhibitor protein II		42	25	11	12	12	15	11	13	6	9	10
IPR011047	Quinoprotein alcohol dehydrogenase-like superfamily		41	28	12.32	12	7	7	11	9	15	18	11
IPR015421	Pyridoxal phosphate-dependent transferase, major domain		41	36	15.84	24	21	24	30	31	28	29	28
IPR015424	Pyridoxal phosphate-dependent transferase		41	36	15.84	25	22	26	30	31	28	29	28
IPR018108	Mitochondrial substrate/solute carrier		41	43	18.92	31	22	30	34	35	29	35	36
IPR023395	Mitochondrial carrier domain superfamily		41	43	18.92	32	22	30	35	36	31	35	37
IPR013320	Concanavalin A-like lectin/glucanase domain superfamily		40	69	30.36	35	23	29	24	23	18	16	18
IPR001789	Signal transduction response regulator, receiver domain	Signal transduction - calcium?	39	10	4.4	2	1	1	0	1	0	0	2
IPR036020	WW domain superfamily		39	45	19.8	12	11	10	10	11	6	8	10
IPR020568	Ribosomal protein uS5 domain 2-type superfamily		39	46	20.24	37	31	28	44	46	43	44	46
IPR011010	DNA breaking-rejoining enzyme, catalytic core		38	1	0.44	36	6	7	2	2	4	3	2
IPR001806	Small GTPase		38	87	38.28	37	27	26	31	30	27	30	31
IPR000408	Regulator of chromosome condensation, RCC1		37	25	11	11	10	14	10	12	5	7	8
IPR035892	C2 domain superfamily		37	56	24.64	12	12	12	20	19	18	22	20
IPR003594	Histidine kinase/HSP90-like ATPase	Signal transduction - calicum	36	11	4.84	7	5	5	6	7	7	7	9
IPR007125	Histone H2A/H2B/H3		36	21	9.24	11	3	6	6	3	7	7	6
IPR001394	Peptidase C19, ubiquitin carboxyl-terminal hydrolase		36	76	33.44	26	28	27	21	21	17	20	20
IPR003959	ATPase, AAA-type, core		36	78	34.32	38	39	35	43	47	41	43	42
IPR015422	Pyridoxal phosphate-dependent transferase, small domain		35	28	12.32	22	16	17	27	29	26	28	26
IPR020472	G-protein beta WD-40 repeat		35	56	24.64	34	34	25	36	37	40	36	39
IPR002909	IPT domain	Cadherin reltaed	34	8	3.52	0	0	0	1	1	1	1	3
IPR013762	Integrase-like, catalytic domain superfamily		34	0	0	36	5	6	0	0	3	1	0
IPR002347	Short-chain dehydrogenase/reductase SDR		34	36	15.84	19	18	14	15	18	16	15	17
IPR036869	Chaperone J-domain superfamily		34	59	25.96	33	28	23	30	29	22	29	31
IPR009057	Homeobox-like domain superfamily		34	88	38.72	59	37	43	38	40	37	45	52
IPR018490	Cyclic nucleotide-binding domain superfamily		33	100	44	6	4	4	4	7	7	6	5
IPR016135	Ubiquitin-conjugating enzyme/RWD-like		33	46	20.24	36	30	29	20	22	26	26	27
IPR029044	Nucleotide-diphospho-sugar transferases		33	99	43.56	31	14	24	48	56	41	40	58
IPR000477	Reverse transcriptase domain	transposon	31	12	5.28	20	0	3	1	8	0	0	2
IPR027359	Voltage-dependent channel domain superfamily	Voltage gated channel	31	18	7.92	2	3	5	1	1	1	0	0
IPR001623	DnaJ domain		31	48	21.12	31	25	23	29	28	20	27	27
IPR029052	Metallo-dependent phosphatase-like		31	61	26.84	41	33	28	37	39	24	32	38
IPR043129	ATPase, nucleotide binding domain		30	276	121.44	38	31	30	96	104	75	85	98
IPR012337	Ribonuclease H-like superfamily		28	351	154.44	115	45	55	28	29	24	25	54
IPR011701	Major facilitator superfamily		28	72	31.68	79	41	58	36	46	43	40	42
IPR000048	IQ motif, EF-hand binding site	Calcium	27	68	29.92	0	0	0	0	0	0	0	0
IPR000742	EGF-like domain		27	181	79.64	4	4	3	4	4	4	5	7
IPR000595	Cyclic nucleotide-binding domain		27	75	33	5	2	3	4	7	4	4	3
IPR011333	SKP1/BTB/POZ domain superfamily		27	179	78.76	42	32	47	5	5	6	7	6
IPR000608	Ubiquitin-conjugating enzyme E2		27	24	10.56	18	16	13	16	17	18	16	19
IPR016181	Acyl-CoA N-acyltransferase		27	29	12.76	32	21	27	27	25	24	30	29
IPR036236	Zinc finger C2H2 superfamily		27	43	18.92	34	26	27	30	34	26	31	38
IPR004843	Calcineurin-like phosphoesterase domain, ApaH type	Calcium	26	55	24.2	37	28	25	32	36	23	31	37
IPR004358	Signal transduction histidine kinase-related protein, C-terminal	Signal transduction	26	5	2.2	1	1	2	1	1	1	1	2
IPR028994	Integrin alpha, N-terminal		26	3	1.32	1	1	1	1	1	1	1	1
IPR015915	Kelch-type beta propeller		26	39	17.16	2	2	2	3	3	1	1	2
IPR003591	Leucine-rich repeat, typical subtype		26	49	21.56	3	3	2	8	5	7	7	4
IPR029021	Protein-tyrosine phosphatase-like		26	65	28.6	17	15	14	24	23	17	19	21
IPR009000	Translation protein, beta-barrel domain superfamily		26	33	14.52	28	21	18	34	36	34	36	38
IPR015919	Cadherin-like superfamily		26	57	25.08	95	72	79	31	42	38	43	123
IPR002126	Cadherin-like	Cadherin related	25	0	0	0	0	0	0	1	0	2	2
IPR041667	Cupin-like domain 8		25	0	0	0	0	0	0	0	0	0	0
IPR036397	Ribonuclease H superfamily		25	333	146.52	69	28	31	61	26	21	21	43
IPR001005	SANT/Myb domain		25	71	31.24	44	26	28	31	32	30	38	41
IPR026983	Dynein heavy chain	Dynein	24	85	37.4	1	3	1	1	0	1	1	1
IPR013111	EGF-like domain, extracellular		24	246	108.24	2	3	2	3	4	2	3	4
IPR036465	von Willebrand factor A-like domain superfamily		24	31	13.64	17	19	10	16	16	12	13	16
IPR045864	Class II Aminoacyl-tRNA synthetase/Biotinyl protein ligase (BPL) and lipoyl protein ligase (LPL)		24	37	16.28	31	26	31	29	31	31	31	31
IPR014721	Small ribosomal subunit protein uS5 domain 2-type fold, subgroup		24	32	14.08	24	19	20	33	34	34	33	34
IPR001841	Zinc finger, RING-type		24	129	56.76	52	36	36	34	27	25	33	40
IPR000014	PAS domain		23	1	0.44	1	0	0	3	4	3	3	2
IPR035965	PAS domain superfamily		23	3	1.32	2	1	1	3	4	3	3	4
IPR036691	Endonuclease/exonuclease/phosphatase superfamily		23	33	14.52	11	14	11	11	23	12	12	12
IPR029055	Nucleophile aminohydrolases, N-terminal		23	32	14.08	22	23	21	19	19	18	18	19
IPR013766	Thioredoxin domain		23	36	15.84	17	15	11	31	36	27	29	32
IPR000073	Alpha/beta hydrolase fold-1		22	18	7.92	4	5	3	2	3	3	3	4
IPR000008	C2 domain		22	30	13.2	6	4	2	6	5	5	7	9
IPR013087	Zinc finger C2H2-type		22	45	19.8	30	17	22	26	30	29	33	35
IPR010920	LSM domain superfamily		21	20	8.8	17	15	12	13	14	11	10	9
IPR011527	ABC transporter type 1, transmembrane domain		21	32	14.08	16	17	14	10	17	18	17	14
IPR036640	ABC transporter type 1, transmembrane domain superfamily		21	35	15.4	17	25	14	10	19	20	23	14
IPR024743	Dynein heavy chain, coiled coil stalk	Dynein	20	27	11.88	1	1	1	1	0	1	1	1
IPR043136	B30.2/SPRY domain superfamily		20	86	37.84	8	5	6	6	5	6	4	4
IPR013780	Glycosyl hydrolase, all-beta		20	25	11	36	19	17	7	7	4	5	8
IPR035983	HECT, E3 ligase catalytic domain		20	54	23.76	9	7	10	9	9	8	9	9
IPR000569	HECT domain		20	52	22.88	9	6	10	9	9	8	9	9
IPR029062	Class I glutamine amidotransferase-like		20	13	5.72	8	8	6	21	51	11	11	10
IPR036282	Glutathione S-transferase, C-terminal domain superfamily		20	33	14.52	17	10	12	12	12	11	13	17
IPR023299	P-type ATPase, cytoplasmic domain N		20	30	13.2	10	8	8	13	12	13	14	13
IPR036457	PPM-type phosphatase-like domain superfamily		20	44	19.36	15	16	17	17	18	18	18	20
IPR029000	Cyclophilin-like domain superfamily		20	24	10.56	14	14	12	21	23	17	19	21
IPR002130	Cyclophilin-type peptidyl-prolyl cis-trans isomerase domain		20	23	10.12	14	14	12	21	23	17	19	21
IPR000182	GNAT domain		20	20	8.8	26	15	21	21	19	19	22	22
IPR000795	Translational (tr)-type GTP-binding domain		20	24	10.56	15	17	11	25	24	27	26	27
IPR013519	Integrin alpha beta-propellor	calcium	19	0	0	0	0	0	0	0	0	0	0
IPR035699	Dynein heavy chain, hydrolytic ATP-binding dynein motor region	Dynein	19	28	12.32	1	1	1	1	0	1	1	1
IPR043157	Dynein heavy chain, AAA1 domain, small subdomain	Dynein	19	24	10.56	1	1	1	1	0	1	1	1
IPR003661	Signal transduction histidine kinase, dimerisation/phosphoacceptor domain	Signal transduction	19	1	0.44	1	0	1	0	0	0	0	1
IPR009030	Growth factor receptor cysteine-rich domain superfamily	Signal transduction	19	25	11	7	3	3	0	0	0	0	0
IPR023753	FAD/NAD(P)-binding domain		19	9	3.96	6	6	8	6	5	6	6	6
IPR036116	Fibronectin type III superfamily		19	75	33	8	9	7	14	15	10	12	10
IPR001757	P-type ATPase		19	28	12.32	9	9	8	10	10	13	13	12
IPR023298	P-type ATPase, transmembrane domain superfamily		19	34	14.96	10	12	9	14	15	15	16	14
IPR036871	PX domain superfamily		19	36	15.84	15	13	10	13	15	14	16	15
IPR015797	NUDIX hydrolase-like domain superfamily		18	15	6.6	12	7	10	9	9	6	9	10
IPR008250	P-type ATPase, A domain superfamily		18	28	12.32	12	11	10	14	13	12	15	14
IPR002067	Mitochondrial carrier protein		18	16	7.04	11	9	9	19	19	11	17	19
IPR049730	SNF2/RAD5-like, C-terminal helicase domain		18	24	10.56	21	14	14	15	15	13	15	17
IPR000330	SNF2, N-terminal		18	23	10.12	21	15	15	15	19	13	14	19
IPR001932	PPM-type phosphatase-like domain		18	42	18.48	15	16	16	16	17	17	17	19
IPR038718	SNF2-like, N-terminal domain superfamily		18	23	10.12	22	17	16	16	18	13	14	18
IPR041569	AAA ATPase, AAA+ lid domain		18	48	21.12	16	16	16	26	30	22	24	25
IPR011012	Longin-like domain superfamily		18	38	16.72	21	24	21	35	36	27	31	30
IPR001199	Cytochrome b5-like heme/steroid binding domain	aerobic metabolism	17	2	0.88	0	0	0	0	0	0	0	0
IPR036400	Cytochrome b5-like heme/steroid binding domain superfamily	aerobic metabolism	17	2	0.88	0	0	0	0	0	0	0	0
IPR035706	Dynein heavy chain, ATP-binding dynein motor region	Dynein	17	39	17.16	1	1	1	1	0	1	1	1
IPR041228	Dynein heavy chain, C-terminal domain	Dynein	17	34	14.96	1	1	1	1	0	1	1	1
IPR043160	Dynein heavy chain, C-terminal domain, barrel region	Dynein	17	31	13.64	1	1	1	1	0	1	1	1
IPR013602	Dynein heavy chain, linker	Dynein	17	28	12.32	1	1	1	1	0	1	1	1
IPR042219	Dynein heavy chain AAA lid domain superfamily	Dynein	17	27	11.88	1	1	1	1	0	1	1	1
IPR004273	Dynein heavy chain region D6 P-loop domain	Dynein	17	26	11.44	1	1	1	1	0	1	1	1
IPR042222	Dynein heavy chain, domain 2, N-terminal	Dynein	17	26	11.44	1	1	1	1	0	1	1	1
IPR042228	Dynein heavy chain, linker, subdomain 3	Dynein	17	25	11	1	1	1	1	0	1	1	1
IPR000210	BTB/POZ domain		17	105	46.2	0	0	0	0	0	0	0	1
IPR002049	Laminin-type EGF domain		17	85	37.4	0	2	2	1	1	1	1	3
IPR001163	Sm domain, eukaryotic/archaea-type		17	18	7.92	13	13	8	11	11	9	9	8
IPR000873	AMP-dependent synthetase/ligase domain		17	36	15.84	19	14	15	14	17	15	18	17
IPR042099	ANL, N-terminal domain		17	36	15.84	20	17	17	16	18	19	19	19
IPR035969	Rab-GAP-TBC domain superfamily		17	48	21.12	20	17	18	18	19	19	19	25
IPR000195	Rab-GAP-TBC domain		17	48	21.12	18	17	18	19	19	19	19	24
IPR041658	Dynein heavy chain AAA lid domain	Dynein	16	25	11	1	1	1	1	0	1	1	1
IPR024317	Dynein heavy chain, AAA module D4	Dynein	16	24	10.56	1	1	1	1	0	1	1	1
IPR036097	Signal transduction histidine kinase, dimerisation/phosphoacceptor domain superfamily	Signal transduction	16	4	1.76	1	0	1	0	0	0	0	1
IPR030916	ELWxxDGT repeat		16	2	0.88	0	0	0	0	0	0	0	0
IPR000086	NUDIX hydrolase domain		16	11	4.84	7	3	6	6	6	2	6	6
IPR008984	SMAD/FHA domain superfamily		16	26	11.44	8	7	9	6	6	8	7	7
IPR001683	Phox homology		16	26	11.44	13	10	8	10	11	11	13	12
IPR029045	ClpP/crotonase-like domain superfamily		16	13	5.72	8	7	8	14	13	12	12	13
IPR015655	Protein phosphatase 2C		16	31	13.64	12	14	13	15	15	14	14	18
IPR006073	GTP binding domain		16	33	14.52	16	15	13	18	20	16	18	17
IPR043203	Voltage-gated cation channel calcium and sodium	Ion channel	15	15	6.6	0	0	0	0	0	0	0	0
IPR000253	Forkhead-associated (FHA) domain		15	23	10.12	6	6	8	5	5	7	6	7
IPR000961	AGC-kinase, C-terminal		15	22	9.68	7	4	4	8	8	5	7	8
IPR000225	Armadillo		15	31	13.64	5	8	9	9	9	8	8	7
IPR000717	Proteasome component (PCI) domain		15	31	13.64	9	8	6	9	10	7	11	13
IPR046341	SET domain superfamily		15	42	18.48	19	19	14	12	11	9	11	13
IPR004839	Aminotransferase, class I/classII		15	18	7.92	12	9	14	17	17	14	16	14
IPR001353	Proteasome, subunit alpha/beta		15	21	9.24	15	19	16	15	15	16	15	16
IPR013057	Amino acid transporter, transmembrane domain		15	20	8.8	19	13	17	22	25	20	23	27
IPR036427	Bromodomain-like superfamily		15	31	13.64	27	22	20	28	27	23	25	28
IPR008979	Galactose-binding-like domain superfamily		15	38	16.72	138	79	83	39	36	33	32	55
IPR009100	Acyl-CoA dehydrogenase/oxidase, N-terminal and middle domain superfamily		14	2	0.88	1	1	0	1	1	0	1	1
IPR000164	Histone H3/CENP-A		14	7	3.08	4	1	1	3	2	1	2	3
IPR029069	HotDog domain superfamily		14	7	3.08	3	2	2	2	2	3	3	3
IPR003877	SPRY domain		14	28	12.32	6	4	4	4	4	4	4	4
IPR013525	ABC-2 type transporter, transmembrane domain		14	89	39.16	5	4	5	3	3	5	5	5
IPR001509	NAD-dependent epimerase/dehydratase		14	14	6.16	2	2	2	8	9	6	8	11
IPR015947	PUA-like superfamily		14	18	7.92	5	6	6	8	8	7	8	10
IPR003961	Fibronectin type III		14	72	31.68	5	8	6	13	14	9	9	9
IPR001107	Band 7 domain		14	20	8.8	6	6	5	11	10	11	11	14
IPR000626	Ubiquitin-like domain		14	31	13.64	25	17	17	22	23	21	28	29
IPR004344	Tubulin-tyrosine ligase/Tubulin polyglutamylase	Microtubule motor	13	31	13.64	0	0	0	0	0	0	0	0
IPR013517	FG-GAP repeat		13	1	0.44	0	0	0	1	0	2	0	0
IPR046373	Acyl-CoA oxidase/dehydrogenase, middle domain superfamily		13	2	0.88	1	1	0	1	1	0	1	1
IPR036250	Acyl-CoA dehydrogenase-like, C-terminal		13	2	0.88	1	1	0	1	1	0	1	1
IPR037069	Acyl-CoA dehydrogenase/oxidase, N-terminal domain superfamily		13	2	0.88	1	1	0	1	1	0	1	1
IPR003347	JmjC domain		13	1	0.44	0	0	0	0	0	0	0	0
IPR036047	F-box-like domain superfamily		13	15	6.6	5	5	4	4	6	5	5	5
IPR002035	von Willebrand factor, type A		13	4	1.76	2	1	1	6	6	6	6	4
IPR046357	Peptidyl-prolyl cis-trans isomerase domain superfamily		13	15	6.6	7	8	7	9	9	6	8	9
IPR044492	P-type ATPase, haloacid dehalogenase domain		13	25	11	8	4	8	12	11	9	14	13
IPR006689	Small GTPase superfamily, ARF/SAR type		13	23	10.12	11	7	8	14	12	9	9	11
IPR009011	Mannose-6-phosphate receptor binding domain superfamily		13	14	6.16	11	12	11	9	11	9	10	11
IPR012341	Six-hairpin glycosidase-like superfamily		13	38	16.72	12	16	12	12	15	12	11	13
IPR020103	Pseudouridine synthase, catalytic domain superfamily		13	19	8.36	13	21	14	9	13	10	12	13
IPR036866	Ribonuclease Z/Hydroxyacylglutathione hydrolase-like		13	31	13.64	16	18	14	18	23	16	16	19
IPR008991	Translation protein SH3-like domain superfamily		13	13	5.72	10	8	9	21	21	22	20	21
IPR001487	Bromodomain		13	31	13.64	25	20	19	28	27	23	25	28
IPR036971	3'5'-cyclic nucleotide phosphodiesterase, catalytic domain superfamily	cAMP	12	10	4.4	0	0	0	0	0	0	0	0
IPR029787	Nucleotide cyclase	cAMP	12	16	7.04	0	0	0	0	0	0	0	0
IPR041589	Dynein heavy chain 3, AAA+ lid domain	Dynein	12	22	9.68	1	1	0	0	0	0	0	0
IPR041466	Dynein heavy chain, AAA 5 extension domain	Dynein	12	21	9.24	1	1	1	1	0	1	1	1
IPR043128	Reverse transcriptase/Diguanylate cyclase domain	Reverse transcritpase	12	9	3.96	13	1	2	2	6	1	1	2
IPR009075	Acyl-CoA dehydrogenase/oxidase, C-terminal		12	2	0.88	1	1	0	1	1	0	1	1
IPR036305	RGS domain superfamily		12	84	36.96	3	2	2	2	3	2	2	2
IPR003607	HD/PDEase domain		12	6	2.64	2	2	2	4	5	2	3	2
IPR032454	Histone H2A, C-terminal domain		12	6	2.64	4	1	2	2	1	4	2	3
IPR002119	Histone H2A		12	6	2.64	4	1	2	2	1	4	2	3
IPR023213	Chloramphenicol acetyltransferase-like domain superfamily		12	5	2.2	3	3	1	3	3	5	4	3
IPR007130	Diacylglycerol acyltransferase		12	3	1.32	2	2	2	4	4	3	3	3
IPR017938	Riboflavin synthase-like beta-barrel		12	12	5.28	4	3	2	2	2	4	4	4
IPR039261	Ferredoxin-NADP reductase (FNR), nucleotide-binding domain		12	8	3.52	5	4	1	3	3	5	5	6
IPR046342	CBS domain superfamily		12	17	7.48	6	5	7	5	5	5	4	6
IPR008928	Six-hairpin glycosidase superfamily		12	10	4.4	12	12	9	5	6	5	5	5
IPR001179	FKBP-type peptidyl-prolyl cis-trans isomerase domain		12	13	5.72	6	7	6	8	8	6	8	8
IPR029033	Histidine phosphatase superfamily		12	33	14.52	8	5	8	8	8	6	7	10
IPR016197	Chromo-like domain superfamily		12	28	12.32	11	4	7	8	10	8	8	11
IPR000594	THIF-type NAD/FAD binding fold		12	15	6.6	8	13	12	9	10	6	7	9
IPR045886	ThiF/MoeB/HesA family		12	13	5.72	8	14	12	9	10	6	7	9
IPR000403	Phosphatidylinositol 3-/4-kinase, catalytic domain		12	21	9.24	10	11	10	10	10	9	10	10
IPR036013	Band 7/SPFH domain superfamily		12	17	7.48	6	6	5	11	10	10	11	14
IPR035985	Ubiquitin-activating enzyme		12	15	6.6	9	15	13	11	13	6	7	9
IPR036034	PDZ superfamily		12	25	11	17	10	13	11	11	9	9	10
IPR001279	Metallo-beta-lactamase		12	24	10.56	14	9	11	14	12	11	13	15
IPR001594	Palmitoyltransferase, DHHC domain		12	21	9.24	21	17	16	18	16	21	22	23
IPR003409	MORN repeat		12	22	9.68	22	29	36	26	31	38	40	54
IPR011011	Zinc finger, FYVE/PHD-type		12	164	72.16	75	52	58	63	56	49	55	60
IPR002073	3'5'-cyclic nucleotide phosphodiesterase, catalytic domain	cAMP	11	10	4.4	0	0	0	0	0	0	0	0
IPR001054	Adenylyl cyclase class-3/4/guanylyl cyclase	cGMP	11	14	6.16	0	0	0	0	0	0	0	0
IPR001609	Myosin head, motor domain	Microtubule motor	11	1	0.44	1	0	0	1	1	1	1	1
IPR039808	Cadherin		11	0	0	0	0	0	0	1	0	0	0
IPR006694	Fatty acid hydroxylase		11	0	0	0	0	0	0	0	0	0	0
IPR006091	Acyl-CoA oxidase/dehydrogenase, middle domain		11	2	0.88	1	1	0	1	1	0	1	1
IPR000558	Histone H2B		11	8	3.52	3	1	3	1	0	2	3	0
IPR012334	Pectin lyase fold		11	7	3.08	7	6	4	1	1	1	1	2
IPR011051	RmlC-like cupin domain superfamily		11	5	2.2	2	1	1	1	1	2	2	2
IPR044926	RGS, subdomain 2		11	83	36.52	2	2	2	2	3	2	2	2
IPR011050	Pectin lyase fold/virulence factor		11	7	3.08	7	8	5	1	1	1	2	2
IPR001951	Histone H4		11	4	1.76	3	0	3	0	1	3	4	2
IPR000644	CBS domain		11	11	4.84	5	5	6	3	3	4	3	3
IPR011044	Quinoprotein amine dehydrogenase, beta chain-like		11	4	1.76	4	1	1	3	4	4	4	1
IPR004045	Glutathione S-transferase, N-terminal		11	19	8.36	9	4	4	5	4	4	4	11
IPR011249	Metalloenzyme, LuxS/M16 peptidase-like		11	9	3.96	5	7	5	5	6	3	4	6
IPR001245	Serine-threonine/tyrosine-protein kinase, catalytic domain		11	31	13.64	7	10	11	5	9	7	6	3
IPR036940	Phosphatidylinositol 3-/4-kinase, catalytic domain superfamily		11	15	6.6	9	7	9	6	6	6	8	7
IPR011032	GroES-like superfamily		11	21	9.24	10	7	7	8	11	6	8	10
IPR045270	Serine/Threonine Kinase AGC, catalytic domain		11	32	14.08	10	6	6	11	11	8	10	11
IPR007502	Helicase-associated domain		11	20	8.8	11	11	12	11	8	10	11	14
IPR036612	K Homology domain, type 1 superfamily		11	17	7.48	11	10	9	16	19	12	13	17
IPR027038	Ran GTPase-activating protein		11	272	119.68	21	13	13	12	13	17	14	13
IPR011053	Single hybrid motif		11	17	7.48	12	7	7	14	15	15	17	16
IPR012675	Beta-grasp domain superfamily		11	22	9.68	13	13	9	18	21	20	20	22
IPR036915	Cyclin-like superfamily		11	31	13.64	23	20	21	23	29	25	28	30
IPR013126	Heat shock protein 70 family		11	238	104.72	15	11	9	72	76	51	58	73
IPR004000	Actin family	Actin	10	15	6.6	10	9	9	14	13	13	12	12
IPR003938	Potassium channel, voltage-dependent, EAG/ELK/ERG	Ion channel	10	11	4.84	0	0	0	0	0	0	0	0
IPR005804	Fatty acid desaturase domain		10	0	0	0	0	0	0	0	0	0	0
IPR001563	Peptidase S10, serine carboxypeptidase		10	1	0.44	0	0	0	0	0	0	0	0
IPR001753	Enoyl-CoA hydratase/isomerase		10	3	1.32	3	4	5	2	2	2	2	2
IPR006553	Leucine-rich repeat, cysteine-containing subtype		10	70	30.8	6	3	5	1	1	5	5	2
IPR003613	U-box domain		10	9	3.96	5	4	4	5	6	4	4	5
IPR016156	FAD/NAD-linked reductase, dimerisation domain superfamily		10	8	3.52	4	4	4	6	5	6	6	6
IPR042469	E3 ubiquitin-protein ligase HECTD3		10	46	20.24	4	4	5	7	7	7	7	5
IPR036812	NADP-dependent oxidoreductase domain superfamily		10	26	11.44	8	8	12	5	5	4	4	10
IPR002921	Fungal lipase-like domain		10	16	7.04	17	10	8	7	7	3	6	9
IPR029056	Ribokinase-like		10	8	3.52	7	6	3	8	8	7	8	8
IPR036873	Rhodanese-like domain superfamily		10	5	2.2	5	5	7	9	8	7	8	8
IPR001214	SET domain		10	31	13.64	14	11	11	8	8	4	6	8
IPR035952	Rhomboid-like superfamily		10	10	4.4	8	7	9	8	9	8	8	7
IPR001296	Glycosyl transferase, family 1		10	12	5.28	12	9	11	10	8	8	9	10
IPR032466	Metal-dependent hydrolase		10	13	5.72	10	12	8	12	14	9	10	10
IPR009080	Aminoacyl-tRNA synthetase, class Ia, anticodon-binding		10	12	5.28	12	9	9	11	11	10	9	10
IPR000089	Biotin/lipoyl attachment		10	10	4.4	9	5	6	11	12	13	13	12
IPR036910	High mobility group box domain superfamily		10	29	12.76	8	8	7	13	12	12	13	16
IPR027409	GroEL-like apical domain superfamily		10	15	6.6	10	11	11	19	20	15	15	16
IPR002423	Chaperonin Cpn60/GroEL/TCP-1 family		10	14	6.16	10	10	12	19	20	16	15	16
IPR004161	Translation elongation factor EFTu-like, domain 2		10	11	4.84	10	8	6	18	18	17	18	22
IPR014722	Large ribosomal subunit protein uL2, domain 2		10	11	4.84	10	5	7	20	21	22	21	23
IPR029047	Heat shock protein 70kD, peptide-binding domain superfamily		10	102	44.88	12	8	8	45	48	28	34	46
IPR006094	FAD linked oxidase, N-terminal	aerobic metabolism	9	0	0	0	0	0	0	0	0	0	0
IPR036318	FAD-binding, type PCMH-like superfamily	aerobic metabolism	9	0	0	0	0	0	0	0	0	0	0
IPR016169	FAD-binding, type PCMH, subdomain 2	aerobic metabolism	9	0	0	0	0	0	0	0	0	0	0
IPR013594	Dynein heavy chain, tail	Dynein	9	9	3.96	1	1	1	1	1	1	1	1
IPR002018	Carboxylesterase, type B		9	0	0	0	0	0	0	0	0	0	0
IPR023352	Membrane associated eicosanoid/glutathione metabolism-like domain superfamily		9	0	0	0	0	0	0	0	0	0	0
IPR020864	Membrane attack complex component/perforin (MACPF) domain		9	0	0	0	0	0	0	0	0	0	0
IPR001129	Membrane-associated, eicosanoid/glutathione metabolism (MAPEG) protein		9	0	0	0	0	0	0	0	0	0	0
IPR013786	Acyl-CoA dehydrogenase/oxidase, N-terminal		9	2	0.88	1	1	0	1	1	0	1	1
IPR016161	Aldehyde/histidinol dehydrogenase		9	2	0.88	0	0	0	4	4	1	1	1
IPR036383	Thrombospondin type-1 (TSP1) repeat superfamily		9	29	12.76	0	0	0	0	0	0	0	0
IPR036052	Tryptophan synthase beta chain-like, PALP domain superfamily		9	1	0.44	2	2	1	1	1	2	2	1
IPR006153	Cation/H+ exchanger		9	13	5.72	1	1	1	1	3	3	4	3
IPR001375	Peptidase S9, prolyl oligopeptidase, catalytic domain		9	5	2.2	2	3	4	2	2	1	2	2
IPR014352	FERM/acyl-CoA-binding protein superfamily		9	3	1.32	2	2	2	1	4	2	2	2
IPR013761	Sterile alpha motif/pointed domain superfamily		9	21	9.24	4	3	3	3	3	2	4	3
IPR011547	SLC26A/SulP transporter domain		9	17	7.48	2	2	3	2	3	3	3	3
IPR035425	CENP-T/Histone H4, histone fold		9	4	1.76	4	1	4	1	2	4	5	3
IPR011765	Peptidase M16, N-terminal		9	7	3.08	4	4	3	5	4	2	3	4
IPR002562	3'-5' exonuclease domain		9	9	3.96	4	4	3	4	9	8	5	7
IPR005135	Endonuclease/exonuclease/phosphatase		9	16	7.04	5	7	5	4	13	3	3	6
IPR023696	Ureohydrolase domain superfamily		9	14	6.16	4	6	2	6	7	5	5	4
IPR020843	Polyketide synthase, enoylreductase domain		9	16	7.04	7	3	6	6	9	4	5	8
IPR000555	JAB1/MPN/MOV34 metalloenzyme domain		9	10	4.4	8	6	5	6	6	6	6	4
IPR001763	Rhodanese-like domain		9	5	2.2	4	4	4	9	8	6	7	6
IPR029006	ADF-H/Gelsolin-like domain superfamily		9	10	4.4	9	9	7	8	8	5	5	7
IPR041679	DNA2/NAM7 helicase-like, C-terminal		9	26	11.44	8	9	8	7	10	7	9	7
IPR041677	DNA2/NAM7 helicase, helicase domain		9	25	11	8	9	7	9	8	8	9	8
IPR047187	Upf1-like, C-terminal helicase domain		9	24	10.56	8	8	8	7	10	7	9	7
IPR009060	UBA-like superfamily		9	20	8.8	10	12	12	9	7	6	7	9
IPR029035	DHS-like NAD/FAD-binding domain superfamily		9	19	8.36	9	13	8	10	9	6	6	9
IPR043519	Nucleotidyltransferase superfamily		9	13	5.72	9	9	9	9	9	7	7	9
IPR035647	EF-G domain III/V-like		9	13	5.72	7	9	7	9	9	9	9	9
IPR000640	Elongation factor EFG, domain V-like		9	11	4.84	6	6	5	9	9	9	9	9
IPR024936	Cyclophilin-type peptidyl-prolyl cis-trans isomerase		9	7	3.08	6	6	5	10	12	9	10	9
IPR029048	Heat shock protein 70kD, C-terminal domain superfamily		9	12	5.28	10	8	7	20	19	9	11	10
IPR029057	Phosphoribosyltransferase-like		9	11	4.84	10	9	8	12	12	9	10	10
IPR004088	K Homology domain, type 1		9	16	7.04	9	8	5	12	14	10	11	14
IPR016185	Pre-ATP-grasp domain superfamily		9	6	2.64	12	6	8	11	12	13	14	13
IPR027410	TCP-1-like chaperonin intermediate domain superfamily		9	12	5.28	9	10	9	18	19	14	14	15
IPR002553	Clathrin/coatomer adaptor, adaptin-like, N-terminal		9	16	7.04	9	7	8	17	19	14	15	15
IPR027413	GroEL-like equatorial domain superfamily		9	13	5.72	9	10	10	18	19	15	14	15
IPR008927	6-phosphogluconate dehydrogenase-like, C-terminal domain superfamily		9	9	3.96	7	8	2	22	25	17	16	16
IPR036872	CH domain superfamily		9	19	8.36	11	11	9	19	19	52	71	18
IPR015757	Calcineurin B protein	Calcium	8	4	1.76	0	0	0	0	0	0	0	0
IPR001372	Dynein light chain, type 1/2	Dynein	8	11	4.84	1	1	0	0	0	1	0	1
IPR037177	Dynein light chain superfamily	Dynein	8	11	4.84	1	1	0	2	1	2	1	2
IPR013099	Potassium channel domain	Potassium channel	8	14	6.16	3	1	1	1	1	1	1	2
IPR036525	Tubulin/FtsZ, GTPase domain superfamily	tubulin	8	25	11	4	5	7	7	7	8	8	8
IPR023088	3'5'-cyclic nucleotide phosphodiesterase		8	6	2.64	0	0	0	0	0	0	0	0
IPR011043	Galactose oxidase/kelch, beta-propeller		8	9	3.96	1	0	1	0	0	1	0	0
IPR027443	Isopenicillin N synthase-like superfamily		8	0	0	0	0	0	0	0	0	0	0
IPR045851	AMP-binding enzyme, C-terminal domain superfamily		8	3	1.32	1	1	1	1	0	0	1	1
IPR003392	Protein patched/dispatched		8	3	1.32	2	1	1	1	1	1	1	1
IPR015590	Aldehyde dehydrogenase domain		8	2	0.88	0	0	0	4	4	1	1	1
IPR016163	Aldehyde dehydrogenase, C-terminal		8	2	0.88	0	0	0	4	4	1	1	1
IPR016162	Aldehyde dehydrogenase, N-terminal		8	2	0.88	0	0	0	3	4	1	1	1
IPR029068	Glyoxalase/Bleomycin resistance protein/Dihydroxybiphenyl dioxygenase		8	1	0.44	1	1	0	1	1	1	1	1
IPR038081	CalX-like domain superfamily		8	2	0.88	0	0	0	0	0	0	0	0
IPR002859	PKD/REJ-like domain		8	8	3.52	0	0	0	0	0	0	0	0
IPR001926	Tryptophan synthase beta chain-like, PALP domain		8	1	0.44	0	0	0	0	0	0	0	0
IPR007603	Choline transporter-like		8	4	1.76	2	2	1	1	1	1	2	2
IPR016137	RGS domain		8	75	33	2	2	2	2	3	2	2	2
IPR036513	STAS domain superfamily		8	14	6.16	1	1	1	2	2	3	3	3
IPR008422	Homeobox KN domain		8	0	0	3	1	2	2	3	2	1	5
IPR026082	ABC transporter A		8	31	13.64	4	2	4	2	2	2	3	3
IPR036859	CAP Gly-rich domain superfamily		8	18	7.92	4	3	3	2	2	2	2	3
IPR005828	Major facilitator, sugar transporter-like		8	16	7.04	10	9	9	3	2	2	2	2
IPR033121	Peptidase family A1 domain		8	4	1.76	11	2	2	4	4	1	1	4
IPR020422	Dual specificity protein phosphatase domain		8	16	7.04	5	2	5	4	4	3	3	3
IPR003689	Zinc/iron permease		8	10	4.4	5	3	4	3	3	3	4	5
IPR000340	Dual specificity phosphatase, catalytic domain		8	23	10.12	6	3	7	5	5	3	3	3
IPR029026	tRNA (guanine-N1-)-methyltransferase, N-terminal		8	6	2.64	5	5	5	4	5	4	4	4
IPR029028	Alpha/beta knot methyltransferases		8	6	2.64	5	5	5	4	5	4	4	4
IPR037138	Histone deacetylase domain superfamily		8	15	6.6	4	6	2	6	7	5	5	4
IPR023801	Histone deacetylase domain		8	14	6.16	4	6	2	6	7	5	5	4
IPR021109	Aspartic peptidase domain superfamily		8	5	2.2	14	3	4	6	6	3	4	7
IPR029039	Flavoprotein-like superfamily		8	5	2.2	3	3	0	5	5	6	6	7
IPR017926	Glutamine amidotransferase		8	3	1.32	3	3	5	5	6	5	5	4
IPR004014	Cation-transporting P-type ATPase, N-terminal		8	13	5.72	5	4	3	6	6	5	6	6
IPR023210	NADP-dependent oxidoreductase domain		8	26	11.44	8	8	12	5	5	3	3	9
IPR039421	Type 1 protein exporter		8	22	9.68	3	8	6	6	7	7	12	9
IPR036621	Anticodon-binding domain superfamily		8	11	4.84	8	4	4	7	7	7	7	9
IPR000300	Inositol polyphosphate-related phosphatase		8	6	2.64	4	2	2	7	9	7	9	7
IPR046985	Inositol 5-phosphatase		8	6	2.64	4	4	2	7	9	8	9	7
IPR041562	MCM, AAA-lid domain		8	16	7.04	8	10	7	8	10	7	8	10
IPR001173	Glycosyltransferase 2-like		8	15	6.6	5	4	5	8	8	8	8	8
IPR033762	MCM OB domain		8	13	5.72	8	11	8	8	10	8	8	10
IPR011013	Galactose mutarotase-like domain superfamily		8	12	5.28	14	9	10	7	8	6	6	8
IPR031327	Mini-chromosome maintenance protein		8	19	8.36	9	15	9	8	10	8	8	10
IPR001208	MCM domain		8	18	7.92	9	10	9	8	10	8	8	10
IPR000994	Peptidase M24		8	9	3.96	9	8	6	10	12	9	9	10
IPR036005	Creatinase/aminopeptidase-like		8	9	3.96	9	8	6	10	12	9	9	10
IPR003107	HAT (Half-A-TPR) repeat		8	18	7.92	9	13	9	10	12	8	9	10
IPR002314	Aminoacyl-tRNA synthetase, class II (G/ P/ S/T)		8	12	5.28	10	8	6	9	11	11	9	10
IPR000836	Phosphoribosyltransferase domain		8	11	4.84	9	9	8	13	13	9	10	10
IPR009001	Translation elongation factor EF1A/initiation factor IF2gamma, C-terminal		8	12	5.28	6	6	3	11	11	13	13	14
IPR017998	Chaperone tailless complex polypeptide 1 (TCP-1)		8	10	4.4	8	9	10	16	17	12	11	12
IPR004087	K Homology domain		8	11	4.84	8	7	4	13	15	12	12	15
IPR036420	BRCT domain superfamily		8	27	11.88	13	10	10	15	13	12	11	17
IPR029061	Thiamin diphosphate-binding fold		8	11	4.84	12	14	10	10	10	14	17	13
IPR027267	AH/BAR domain superfamily		8	28	12.32	14	6	6	13	14	13	13	13
IPR013815	ATP-grasp fold, subdomain 1		8	11	4.84	20	10	14	17	17	13	12	12
IPR008942	ENTH/VHS		8	13	5.72	12	10	8	15	14	14	15	17
IPR006186	Serine/threonine-specific protein phosphatase/bis(5-nucleosyl)-tetraphosphatase		8	34	14.96	14	14	13	22	24	16	21	27
IPR013128	Peptidase C1A		8	30	13.2	24	14	12	26	25	34	45	23
IPR000668	Peptidase C1A, papain C-terminal		8	34	14.96	25	14	15	29	30	49	64	45
IPR006593	Cytochrome b561/ferric reductase transmembrane	aerobic metabolism	7	0	0	0	0	0	0	0	0	0	0
IPR001128	Cytochrome P450	aerobic metabolism	7	0	0	0	0	0	0	0	0	0	0
IPR036396	Cytochrome P450 superfamily	aerobic metabolism	7	0	0	0	0	0	0	0	0	0	0
IPR045122	Calcium permeable stress-gated cation channel 1-like	Calcium	7	3	1.32	0	0	0	0	0	0	0	0
IPR023123	Tubulin, C-terminal	tubulin	7	17	7.48	3	3	3	6	7	5	7	7
IPR008280	Tubulin/FtsZ, C-terminal	tubulin	7	24	10.56	3	4	3	6	7	6	7	7
IPR003008	Tubulin/FtsZ, GTPase domain	tubulin	7	23	10.12	3	2	4	6	6	7	7	7
IPR018316	Tubulin/FtsZ, 2-layer sandwich domain	tubulin	7	20	8.8	3	4	3	6	7	6	7	7
IPR000217	Tubulin	tubulin	7	25	11	3	4	4	6	7	7	7	7
IPR011042	Six-bladed beta-propeller, TolB-like		7	7	3.08	1	3	1	0	0	2	0	0
IPR009003	Peptidase S1, PA clan		7	5	2.2	3	3	2	0	0	0	0	0
IPR025110	AMP-binding enzyme, C-terminal domain		7	0	0	0	0	0	0	0	1	1	1
IPR029020	Ammonium/urea transporter		7	0	0	0	0	0	0	0	0	0	0
IPR012171	Fatty acid desaturase		7	0	0	0	0	0	0	0	0	0	0
IPR025733	Iron/zinc purple acid phosphatase-like C-terminal domain		7	0	0	0	0	0	0	0	0	0	0
IPR006620	Prolyl 4-hydroxylase, alpha subunit		7	0	0	0	0	0	0	0	0	0	0
IPR041792	Purple acid phosphatase, metallophosphatase domain		7	0	0	0	0	0	0	0	0	0	0
IPR001300	Peptidase C2, calpain, catalytic domain		7	25	11	1	1	1	1	1	1	1	1
IPR015894	Guanylate-binding protein, N-terminal		7	13	5.72	1	1	1	1	1	6	7	8
IPR012674	Calycin		7	0	0	1	2	1	1	1	0	0	1
IPR012338	Beta-lactamase/transpeptidase-like		7	4	1.76	0	0	0	0	0	0	0	0
IPR000884	Thrombospondin type-1 (TSP1) repeat		7	21	9.24	0	0	0	0	0	0	0	0
IPR011641	Tyrosine-protein kinase ephrin type A/B receptor-like		7	1	0.44	0	0	0	0	0	0	0	0
IPR016039	Thiolase-like		7	11	4.84	5	2	4	2	2	1	3	2
IPR006597	Sel1-like repeat		7	11	4.84	2	3	2	1	1	2	2	2
IPR025697	CLU domain		7	3	1.32	1	1	0	3	2	2	2	2
IPR001356	Homeobox domain		7	1	0.44	3	1	2	2	3	2	1	5
IPR001660	Sterile alpha motif domain		7	17	7.48	3	2	2	3	3	2	3	2
IPR000938	CAP Gly-rich domain		7	16	7.04	3	3	3	2	2	2	2	3
IPR012336	Thioredoxin-like fold		7	6	2.64	5	2	5	2	2	2	3	4
IPR017850	Alkaline-phosphatase-like, core domain superfamily		7	28	12.32	10	10	7	3	3	3	2	2
IPR016035	Acyl transferase/acyl hydrolase/lysophospholipase		7	16	7.04	4	1	3	2	2	4	3	3
IPR046347	Basic-leucine zipper domain superfamily		7	9	3.96	7	6	5	3	3	3	3	3
IPR011060	Ribulose-phosphate binding barrel		7	7	3.08	4	3	2	2	2	3	3	3
IPR030616	Aurora kinase-like		7	11	4.84	3	2	5	4	5	2	3	4
IPR017892	Protein kinase, C-terminal		7	9	3.96	2	3	2	4	4	2	4	6
IPR015940	Ubiquitin-associated domain		7	8	3.52	5	4	7	5	3	2	2	3
IPR040079	Glutathione transferase family		7	14	6.16	3	3	3	5	4	4	4	11
IPR007863	Peptidase M16, C-terminal		7	7	3.08	4	4	3	5	5	3	4	6
IPR020094	Pseudouridine synthase TruA/RsuA/RluB/E/F, N-terminal		7	7	3.08	4	5	4	3	4	3	4	4
IPR007696	DNA mismatch repair protein MutS, core		7	6	2.64	5	2	4	4	2	3	4	4
IPR001461	Aspartic peptidase A1 family		7	3	1.32	10	2	2	4	4	1	4	5
IPR042201	Formin, FH2 domain superfamily		7	2	0.88	4	4	4	3	4	4	4	5
IPR015425	Formin, FH2 domain		7	2	0.88	4	4	4	3	4	4	4	5
IPR013078	Histidine phosphatase superfamily, clade-1		7	15	6.6	5	3	5	5	4	3	4	5
IPR045076	DNA mismatch repair MutS family		7	6	2.64	5	7	7	5	2	4	4	4
IPR000432	DNA mismatch repair protein MutS, C-terminal		7	6	2.64	5	5	5	5	2	4	4	4
IPR044746	ABC transporter C family, six-transmembrane helical domain 1		7	4	1.76	10	5	4	3	7	4	10	2
IPR022764	Peptidase S54, rhomboid domain		7	7	3.08	7	5	6	5	5	5	5	5
IPR011332	Zinc-binding ribosomal protein		7	7	3.08	4	4	2	5	5	8	10	8
IPR036187	DNA mismatch repair protein MutS, core domain superfamily		7	6	2.64	5	5	6	5	3	4	4	5
IPR020471	Aldo-keto reductase		7	17	7.48	7	7	11	4	4	3	3	9
IPR006068	Cation-transporting P-type ATPase, C-terminal		7	14	6.16	5	4	4	6	6	7	8	6
IPR013154	Alcohol dehydrogenase-like, N-terminal		7	12	5.28	6	5	5	6	9	4	6	8
IPR013216	Methyltransferase type 11		7	8	3.52	6	6	5	7	6	1	6	6
IPR027408	PNPase/RNase PH domain superfamily		7	8	3.52	6	6	5	6	6	5	6	6
IPR001247	Exoribonuclease, phosphorolytic domain 1		7	7	3.08	6	6	5	6	6	5	6	6
IPR002300	Aminoacyl-tRNA synthetase, class Ia		7	6	2.64	6	4	4	9	8	6	5	7
IPR000192	Aminotransferase class V domain		7	5	2.2	6	7	5	5	6	6	5	6
IPR019956	Ubiquitin domain		7	14	6.16	5	3	2	6	7	8	9	10
IPR004154	Anticodon-binding		7	10	4.4	7	4	4	6	6	7	7	8
IPR013632	DNA recombination and repair protein Rad51-like, C-terminal		7	9	3.96	5	6	4	8	7	6	8	7
IPR023333	Proteasome B-type subunit		7	12	5.28	8	9	7	6	6	7	7	8
IPR045055	DNA2/NAM7-like helicase		7	29	12.76	8	9	8	9	11	8	9	8
IPR036361	SAP domain superfamily		7	23	10.12	10	6	5	9	10	7	8	10
IPR011709	DEAD-box helicase, OB fold		7	11	4.84	9	8	11	9	9	10	11	14
IPR037171	NagB/RpiA transferase-like		7	17	7.48	12	12	11	17	15	7	11	12
IPR029064	Ribosomal protein eL30-like superfamily		7	8	3.52	9	10	7	14	13	12	14	15
IPR022775	AP complex, mu/sigma subunit		7	21	9.24	9	11	9	19	20	14	16	17
IPR049625	Glycosyltransferase 61, catalytic domain		7	29	12.76	29	19	38	16	18	12	18	22
IPR000571	Zinc finger, CCCH-type		7	51	22.44	22	25	20	19	22	16	22	23
IPR008978	HSP20-like chaperone		7	33	14.52	25	17	18	17	23	27	26	26
IPR001965	Zinc finger, PHD-type		7	101	44.44	50	34	47	38	33	33	36	41
IPR011704	ATPase, dynein-related, AAA domain	Dynein	6	19	8.36	17	12	11	2	2	3	1	2
IPR037103	Tubulin/FtsZ-like, C-terminal domain	tubulin	6	18	7.92	3	4	3	6	7	6	7	7
IPR038586	Tctex-1-like superfamily		6	9	3.96	1	1	1	0	0	0	0	1
IPR036393	Acetylglutamate kinase-like superfamily		6	1	0.44	0	0	0	0	0	0	0	0
IPR045865	ACT-like domain		6	1	0.44	0	0	0	0	0	0	0	0
IPR028082	Periplasmic binding protein-like I		6	182	80.08	0	0	0	0	0	1	1	1
IPR036514	SGNH hydrolase superfamily		6	27	11.88	2	5	3	0	0	0	0	0
IPR031127	E3 ubiquitin ligase RBR family		6	14	6.16	4	7	5	0	0	0	0	0
IPR029016	GAF-like domain superfamily		6	8	3.52	2	1	1	0	0	0	0	0
IPR028846	Recoverin family		6	6	2.64	0	0	1	1	2	0	0	0
IPR001577	Peptidase M8, leishmanolysin		6	5	2.2	1	1	1	0	0	0	0	0
IPR000542	Acyltransferase ChoActase/COT/CPT		6	0	0	0	0	0	0	0	0	0	0
IPR024041	Ammonium transporter AmtB-like domain		6	0	0	0	0	0	0	0	0	0	0
IPR049452	Anoctamin, transmembrane domain		6	0	0	0	0	0	0	0	0	0	0
IPR001425	Archaeal/bacterial/fungal rhodopsins		6	0	0	0	0	0	0	0	0	0	0
IPR039551	Choline/carnitine acyltransferase domain		6	0	0	0	0	0	0	0	0	0	0
IPR042231	Choline/Carnitine o-acyltransferase, domain 2		6	0	0	0	0	0	0	0	0	0	0
IPR003495	CobW/HypB/UreG, nucleotide-binding domain		6	0	0	0	0	0	0	0	0	0	0
IPR036134	Cryptochrome/DNA photolyase, FAD-binding domain-like superfamily		6	0	0	0	0	0	0	0	0	0	0
IPR008963	Purple acid phosphatase-like, N-terminal		6	0	0	0	0	0	0	0	0	0	0
IPR015914	Purple acid phosphatase, N-terminal		6	0	0	0	0	0	0	0	0	0	0
IPR011629	Zinc chaperone CobW-like, C-terminal		6	0	0	0	0	0	0	0	0	0	0
IPR001048	Aspartate/glutamate/uridylate kinase		6	1	0.44	0	0	0	0	0	0	0	0
IPR002867	IBR domain		6	15	6.6	4	6	6	1	1	1	0	1
IPR000917	Sulfatase, N-terminal		6	10	4.4	6	6	4	1	1	1	0	1
IPR038770	Sodium/solute symporter superfamily		6	6	2.64	2	1	2	1	1	1	1	1
IPR006683	Thioesterase domain		6	1	0.44	1	0	0	1	1	1	1	1
IPR019749	Band 4.1 domain		6	1	0.44	1	1	1	1	2	2	1	1
IPR006602	DM10 domain		6	3	1.32	0	0	0	0	0	0	0	0
IPR006813	Glycosyl transferase, family 17		6	10	4.4	0	0	0	0	0	0	0	0
IPR006121	Heavy metal-associated domain, HMA		6	3	1.32	0	0	0	0	0	0	0	0
IPR013122	Polycystin cation channel, PKD1/PKD2		6	3	1.32	0	0	0	0	0	0	0	0
IPR041698	Methyltransferase domain 25		6	12	5.28	2	1	0	5	5	1	1	3
IPR002645	STAS domain		6	9	3.96	0	1	1	1	2	3	3	2
IPR001810	F-box domain		6	14	6.16	4	2	2	0	0	3	3	1
IPR018422	Cation/H+ exchanger, CPA1 family		6	10	4.4	1	1	1	1	3	3	4	3
IPR000232	Heat shock factor (HSF)-type, DNA-binding		6	9	3.96	2	3	2	2	2	2	2	2
IPR000834	Peptidase M14, carboxypeptidase A		6	8	3.52	2	3	2	2	2	2	2	2
IPR036380	Isochorismatase-like superfamily		6	7	3.08	2	1	2	2	2	2	1	2
IPR000868	Isochorismatase-like		6	6	2.64	2	1	2	2	2	2	1	2
IPR008011	Complex 1 LYR protein domain		6	4	1.76	3	4	2	2	1	1	1	2
IPR006634	TRAM/LAG1/CLN8 homology domain		6	4	1.76	2	3	2	2	2	3	2	2
IPR003010	Carbon-nitrogen hydrolase		6	3	1.32	3	2	2	2	3	2	2	2
IPR036526	Carbon-nitrogen hydrolase superfamily		6	3	1.32	4	2	3	2	3	2	2	2
IPR001537	tRNA/rRNA methyltransferase, SpoU type		6	3	1.32	3	3	4	2	2	2	2	2
IPR022742	Serine aminopeptidase, S33		6	1	0.44	2	3	3	2	2	2	2	4
IPR001433	Oxidoreductase FAD/NAD(P)-binding		6	3	1.32	2	3	0	2	2	4	4	4
IPR036317	Cullin homology domain superfamily		6	17	7.48	5	6	3	2	3	3	3	3
IPR013149	Alcohol dehydrogenase-like, C-terminal		6	11	4.84	4	2	5	2	3	3	3	5
IPR001478	PDZ domain		6	12	5.28	7	5	7	1	1	3	4	2
IPR023780	Chromo domain		6	11	4.84	5	1	3	4	5	3	3	4
IPR036852	Peptidase S8/S53 domain superfamily		6	7	3.08	2	4	3	5	6	3	4	3
IPR004147	ABC1 atypical kinase-like domain		6	4	1.76	6	5	3	3	3	4	3	4
IPR000953	Chromo/chromo shadow domain		6	13	5.72	6	3	5	3	4	3	4	5
IPR025799	Protein arginine N-methyltransferase		6	10	4.4	5	7	4	4	4	4	4	4
IPR013520	Exonuclease, RNase T/DNA polymerase III		6	4	1.76	4	5	2	3	3	4	6	4
IPR001251	CRAL-TRIO lipid binding domain		6	10	4.4	4	5	4	5	5	3	3	5
IPR016064	NAD kinase/diacylglycerol kinase-like domain superfamily		6	9	3.96	5	5	7	4	4	2	4	5
IPR004365	OB-fold nucleic acid binding domain, AA-tRNA synthetase-type		6	11	4.84	8	5	4	5	5	4	6	6
IPR029066	PLP-binding barrel		6	9	3.96	9	7	5	5	5	5	5	5
IPR015433	Phosphatidylinositol kinase		6	8	3.52	6	3	6	5	5	5	6	5
IPR004099	Pyridine nucleotide-disulphide oxidoreductase, dimerisation domain		6	8	3.52	4	3	4	6	5	5	5	6
IPR037191	VPS9 domain superfamily		6	8	3.52	5	3	5	5	5	5	6	6
IPR034085	TOG domain		6	13	5.72	8	3	3	4	3	7	8	7
IPR036865	CRAL-TRIO lipid binding domain superfamily		6	11	4.84	6	6	5	6	6	4	5	5
IPR004364	Aminoacyl-tRNA synthetase, class II (D/K/N)		6	10	4.4	7	7	5	5	6	7	6	6
IPR012676	TGS-like		6	10	4.4	6	6	5	7	7	5	6	6
IPR009008	Valyl/Leucyl/Isoleucyl-tRNA synthetase, editing domain		6	6	2.64	6	4	4	6	6	6	5	6
IPR043153	DENN domain, C-terminal lobe		6	19	8.36	9	5	5	8	9	6	6	7
IPR003034	SAP domain		6	20	8.8	5	3	3	8	7	7	7	8
IPR004853	Sugar phosphate transporter domain		6	12	5.28	7	7	6	10	9	6	7	9
IPR023393	START-like domain superfamily		6	9	3.96	12	4	8	7	8	5	7	7
IPR003395	RecF/RecN/SMC, N-terminal		6	12	5.28	5	8	5	14	12	7	6	8
IPR006204	GHMP kinase N-terminal domain		6	8	3.52	8	7	6	9	11	6	6	9
IPR000426	Proteasome alpha-subunit, N-terminal domain		6	7	3.08	7	9	7	9	9	5	6	8
IPR029060	PIN-like domain superfamily		6	11	4.84	13	8	8	9	8	7	8	6
IPR001715	Calponin homology domain		6	6	2.64	6	8	6	8	8	10	11	9
IPR048333	Helicase associated domain (HA2), winged-helix domain		6	16	7.04	8	9	8	9	7	7	9	11
IPR010989	SNARE		6	16	7.04	10	8	9	9	10	7	7	7
IPR011004	Trimeric LpxA-like superfamily		6	15	6.6	12	10	5	10	9	7	8	8
IPR000727	Target SNARE coiled-coil homology domain		6	18	7.92	11	8	8	9	10	10	10	8
IPR011054	Rudiment single hybrid motif		6	6	2.64	9	4	4	9	10	12	12	11
IPR005479	Carbamoyl-phosphate synthetase large subunit-like, ATP-binding domain		6	5	2.2	8	5	6	9	10	13	12	10
IPR013328	6-phosphogluconate dehydrogenase, domain 2		6	6	2.64	5	6	1	10	11	10	10	10
IPR005024	Snf7 family		6	6	2.64	9	6	3	13	13	10	11	11
IPR006671	Cyclin, N-terminal		6	17	7.48	14	10	8	10	12	11	11	14
IPR009071	High mobility group box domain		6	16	7.04	7	6	7	12	11	12	13	15
IPR001164	Arf GTPase activating protein		6	16	7.04	7	7	4	14	15	11	15	16
IPR037278	ARFGAP/RecO-like zinc finger		6	16	7.04	7	7	4	14	15	11	15	16
IPR038508	ArfGAP domain superfamily		6	16	7.04	7	7	4	14	15	12	15	16
IPR047871	Calcium-activated potassium channel slowpoke-like	Calcium activated channel	5	2	0.88	4	4	4	2	2	2	1	2
IPR005334	Dynein light chain Tctex-1 like	Dynein	5	9	3.96	1	1	1	0	0	0	0	1
IPR002937	Amine oxidase		5	2	0.88	0	0	0	0	0	0	0	0
IPR006652	Kelch repeat type 1		5	8	3.52	1	0	0	0	0	0	0	1
IPR003018	GAF domain		5	2	0.88	1	1	1	0	0	0	0	0
IPR003609	PAN/Apple domain		5	2	0.88	3	5	3	0	0	0	0	0
IPR036928	Amidase signature (AS) superfamily		5	1	0.44	1	1	2	0	0	0	0	0
IPR023631	Amidase signature domain		5	1	0.44	1	1	2	0	0	0	0	0
IPR016187	C-type lectin fold		5	1	0.44	1	1	1	0	0	0	0	0
IPR002641	Patatin-like phospholipase domain		5	0	0	0	0	0	0	0	2	2	1
IPR045188	PH domain containing protein Boi1/Boi2-like		5	0	0	0	0	0	0	0	1	0	0
IPR001466	Beta-lactamase-related		5	0	0	0	0	0	0	0	0	0	0
IPR007274	Ctr copper transporter		5	0	0	0	0	0	0	0	0	0	0
IPR022099	Domain of unknown function DUF3638		5	0	0	0	0	0	0	0	0	0	0
IPR006644	Dystroglycan-type cadherin-like		5	0	0	0	0	0	0	0	0	0	0
IPR001547	Glycoside hydrolase, family 5		5	0	0	0	0	0	0	0	0	0	0
IPR010255	Haem peroxidase superfamily		5	0	0	0	0	0	0	0	0	0	0
IPR015683	Ionotropic glutamate receptor		5	0	0	0	0	0	0	0	0	0	0
IPR011936	Myxococcus cysteine-rich repeat		5	0	0	0	0	0	0	0	0	0	0
IPR044862	Prolyl 4-hydroxylase alpha subunit, Fe(2+) 2OG dioxygenase domain		5	0	0	0	0	0	0	0	0	0	0
IPR040853	RapA2, cadherin-like domain		5	0	0	0	0	0	0	0	0	0	0
IPR035992	Ricin B-like lectins		5	0	0	0	0	0	0	0	0	0	0
IPR017941	Rieske [2Fe-2S] iron-sulphur domain		5	0	0	0	0	0	0	0	0	0	0
IPR036922	Rieske [2Fe-2S] iron-sulphur domain superfamily		5	0	0	0	0	0	0	0	0	0	0
IPR011001	Saposin-like		5	0	0	0	0	0	0	0	0	0	0
IPR001638	Solute-binding protein family 3/N-terminal domain of MltF		5	0	0	0	0	0	0	0	0	0	0
IPR010308	TRP, C-terminal		5	0	0	0	0	0	0	0	0	0	0
IPR036213	Calpain large subunit, domain III superfamily		5	22	9.68	1	1	1	1	1	1	1	1
IPR022684	Peptidase C2, calpain family		5	15	6.6	0	1	1	1	1	1	1	1
IPR036850	Nucleoside diphosphate kinase-like domain superfamily		5	14	6.16	1	1	1	1	1	1	1	1
IPR008521	Magnesium transporter NIPA		5	10	4.4	2	0	1	1	2	0	0	1
IPR034907	Nucleoside diphosphate kinase-like domain		5	8	3.52	1	1	1	1	1	1	1	1
IPR006140	D-isomer specific 2-hydroxyacid dehydrogenase, NAD-binding domain		5	6	2.64	1	1	1	1	1	0	1	2
IPR006139	D-isomer specific 2-hydroxyacid dehydrogenase, catalytic domain		5	5	2.2	1	1	1	1	1	1	1	2
IPR006615	Peptidase C19, ubiquitin-specific peptidase, DUSP domain		5	5	2.2	1	2	1	1	1	1	2	2
IPR035984	Acyl-CoA binding protein superfamily		5	3	1.32	1	1	1	0	1	1	1	1
IPR000582	Acyl-CoA-binding protein, ACBP		5	3	1.32	1	1	1	0	1	1	1	1
IPR036663	Fumarylacetoacetase-like, C-terminal domain superfamily		5	1	0.44	2	1	2	1	1	1	1	1
IPR006076	FAD dependent oxidoreductase		5	0	0	1	1	1	1	1	1	2	2
IPR014748	Enoyl-CoA hydratase, C-terminal		5	0	0	1	1	1	1	1	0	1	1
IPR002539	MaoC-like dehydratase domain		5	0	0	1	1	1	0	0	1	1	1
IPR000277	Cys/Met metabolism, pyridoxal phosphate-dependent enzyme		5	2	0.88	0	0	0	0	0	0	0	0
IPR001298	Filamin/ABP280 repeat		5	7	3.08	0	0	0	0	0	0	0	0
IPR011025	G protein alpha subunit, helical insertion		5	6	2.64	0	0	0	0	0	0	0	0
IPR001019	Guanine nucleotide binding protein (G-protein), alpha subunit		5	7	3.08	0	0	0	0	0	0	0	0
IPR036163	Heavy metal-associated domain superfamily		5	3	1.32	0	0	0	0	0	0	0	0
IPR008758	Peptidase S28		5	3	1.32	0	0	0	0	0	0	0	0
IPR046791	Polycystin domain		5	2	0.88	0	0	0	0	0	0	0	0
IPR042269	Serine carboxypeptidase S28, SKS domain		5	3	1.32	0	0	0	0	0	0	0	0
IPR043597	Trichohyalin-plectin-homology domain		5	8	3.52	0	0	0	0	0	0	0	0
IPR035927	DUSP-like superfamily		5	10	4.4	2	2	1	1	1	1	2	2
IPR000322	Glycoside hydrolase family 31, TIM barrel domain		5	3	1.32	10	5	6	1	1	1	1	2
IPR048395	Glycosyl hydrolase family 31, C-terminal domain		5	2	0.88	10	5	4	1	1	1	1	2
IPR045093	Cullin		5	14	6.16	2	4	2	2	2	2	2	2
IPR019559	Cullin protein, neddylation domain		5	11	4.84	2	2	1	2	2	2	2	2
IPR027725	Heat shock transcription factor family		5	9	3.96	2	3	1	2	2	2	2	2
IPR016158	Cullin homology domain		5	9	3.96	1	3	1	2	2	2	2	2
IPR002076	ELO family		5	7	3.08	2	0	2	1	1	2	2	3
IPR011257	DNA glycosylase		5	6	2.64	5	3	4	2	2	2	2	2
IPR005475	Transketolase-like, pyrimidine-binding domain		5	6	2.64	4	5	1	1	2	2	2	2
IPR001078	2-oxoacid dehydrogenase acyltransferase, catalytic domain		5	5	2.2	3	3	1	2	2	2	2	1
IPR002109	Glutaredoxin		5	3	1.32	2	2	1	2	2	2	2	2
IPR010994	RuvA domain 2-like		5	7	3.08	2	2	4	2	4	1	3	4
IPR001972	Stomatin/HflK family		5	5	2.2	1	3	2	2	3	2	3	6
IPR001373	Cullin, N-terminal		5	14	6.16	1	7	1	3	3	3	3	3
IPR025659	Tubby-like, C-terminal		5	14	6.16	1	1	1	3	3	3	3	3
IPR041233	Alpha galactosidase, C-terminal beta sandwich domain		5	11	4.84	10	3	3	4	4	1	2	3
IPR002241	Glycoside hydrolase, family 27		5	10	4.4	11	3	3	4	4	1	2	3
IPR007000	Phospholipase B-like		5	10	4.4	3	3	5	3	3	3	3	3
IPR010734	Copine, C-terminal		5	9	3.96	3	1	1	3	3	3	3	2
IPR016098	Cyclase-associated protein CAP/septum formation inhibitor MinC, C-terminal		5	8	3.52	2	2	1	3	3	3	3	3
IPR027483	Phosphatidylinositol-4-phosphate 4/5-kinase, C-terminal domain superfamily		5	6	2.64	4	5	4	2	3	3	3	3
IPR001902	SLC26A/SulP transporter		5	6	2.64	2	2	3	2	3	3	3	3
IPR000209	Peptidase S8/S53 domain		5	6	2.64	2	3	2	5	5	3	4	3
IPR040442	Pyruvate kinase-like domain superfamily		5	4	1.76	4	4	2	3	3	3	3	3
IPR015813	Pyruvate/Phosphoenolpyruvate kinase-like domain superfamily		5	4	1.76	4	4	2	3	3	3	3	3
IPR004299	Membrane bound O-acyl transferase, MBOAT		5	3	1.32	4	4	5	2	2	3	2	3
IPR023173	NADPH-cytochrome p450 reductase, FAD-binding, alpha-helical domain superfamily		5	3	1.32	3	3	0	2	2	4	4	4
IPR014718	Glycoside hydrolase-type carbohydrate-binding		5	3	1.32	3	2	2	3	3	3	3	3
IPR003137	PA domain		5	20	8.8	3	3	3	4	3	4	4	5
IPR015883	Glycoside hydrolase family 20, catalytic domain		5	15	6.6	14	17	10	3	3	3	4	3
IPR025705	Beta-hexosaminidase		5	15	6.6	14	17	11	3	3	3	4	3
IPR027484	Phosphatidylinositol-4-phosphate 5-kinase, N-terminal		5	7	3.08	4	3	4	4	3	3	4	3
IPR004827	Basic-leucine zipper domain		5	6	2.64	6	5	3	3	3	4	4	3
IPR001094	Flavodoxin-like		5	4	1.76	3	3	0	4	4	6	6	3
IPR008949	Isoprenoid synthase domain superfamily		5	4	1.76	2	4	4	4	6	2	3	3
IPR012295	TBP domain superfamily		5	11	4.84	5	4	3	4	3	5	4	4
IPR003123	VPS9 domain		5	8	3.52	3	3	4	4	5	4	5	5
IPR017438	Inorganic polyphosphate/ATP-NAD kinase, N-terminal		5	8	3.52	5	4	6	4	4	2	4	5
IPR009038	GOLD domain		5	8	3.52	6	4	4	5	5	3	4	4
IPR032501	Proteasomal ATPase, second OB domain		5	8	3.52	4	3	4	4	4	4	4	4
IPR002498	Phosphatidylinositol-4-phosphate 4/5-kinase, core		5	7	3.08	4	6	5	4	4	3	3	3
IPR036974	PUA domain superfamily		5	5	2.2	3	3	1	4	4	4	5	5
IPR032631	P-type ATPase, N-terminal		5	4	1.76	4	3	2	6	5	1	4	5
IPR002478	PUA domain		5	4	1.76	3	3	2	4	4	4	5	5
IPR000286	Histone deacetylase family		5	11	4.84	4	5	2	4	5	5	5	4
IPR000850	Adenylate kinase/UMP-CMP kinase		5	15	6.6	4	2	2	5	5	6	7	8
IPR016193	Cytidine deaminase-like		5	15	6.6	6	7	7	5	5	4	5	5
IPR032630	P-type ATPase, C-terminal		5	9	3.96	4	4	3	5	5	5	6	7
IPR003029	S1 domain		5	8	3.52	6	5	5	5	6	4	6	4
IPR013155	Methionyl/Valyl/Leucyl/Isoleucyl-tRNA synthetase, anticodon-binding		5	6	2.64	6	3	3	5	5	6	5	6
IPR043130	CDP-alcohol phosphatidyltransferase, transmembrane domain		5	4	1.76	5	6	3	5	6	5	5	4
IPR008254	Flavodoxin/nitric oxide synthase		5	4	1.76	3	3	0	5	5	6	6	6
IPR044726	ABC transporter C family, six-transmembrane helical domain 2		5	1	0.44	8	5	4	3	5	10	9	2
IPR016159	Cullin repeat-like-containing domain superfamily		5	20	8.8	6	9	5	7	8	5	4	5
IPR002885	Pentatricopeptide repeat		5	11	4.84	7	5	5	6	6	4	5	8
IPR044666	Cyclophilin-type peptidyl-prolyl cis-trans isomerase, cyclophilin A-like		5	6	2.64	5	6	5	6	6	5	5	8
IPR038185	MyTH4 domain superfamily		5	4	1.76	4	4	3	6	6	6	6	5
IPR011335	Restriction endonuclease type II-like		5	4	1.76	6	5	6	7	8	4	4	5
IPR000857	MyTH4 domain		5	4	1.76	3	4	3	6	6	6	6	5
IPR027925	MCM, N-terminal domain		5	23	10.12	6	8	5	6	8	6	5	8
IPR001876	Zinc finger, RanBP2-type		5	16	7.04	11	5	5	3	6	6	7	6
IPR036265	HIT-like superfamily		5	13	5.72	6	6	8	6	6	5	5	7
IPR003000	Sirtuin family		5	9	3.96	6	7	5	7	6	2	2	6
IPR040122	Importin beta family		5	9	3.96	7	3	3	6	6	5	6	7
IPR001040	Translation Initiation factor eIF- 4e		5	8	3.52	6	6	5	10	9	6	6	9
IPR023398	Translation Initiation factor eIF- 4e-like		5	8	3.52	6	6	6	10	9	6	6	9
IPR007109	Brix domain		5	8	3.52	5	6	3	6	6	5	7	7
IPR005517	Translation elongation factor EFG/EF2, domain IV		5	6	2.64	3	4	3	7	6	7	7	6
IPR001194	cDENN domain		5	20	8.8	8	5	5	7	7	6	6	7
IPR029018	Beta-hexosaminidase-like, domain 2		5	15	6.6	18	15	11	6	6	6	7	4
IPR015946	K homology domain-like, alpha/beta		5	5	2.2	4	4	3	7	8	8	7	6
IPR000194	ATPase, F1/V1/A1 complex, alpha/beta subunit, nucleotide-binding domain		5	2	0.88	3	2	1	7	7	7	7	7
IPR002524	Cation efflux protein		5	9	3.96	8	9	6	7	8	6	7	8
IPR027469	Cation efflux transmembrane domain superfamily		5	9	3.96	8	9	6	7	8	6	7	8
IPR008948	L-Aspartase-like		5	5	2.2	6	3	3	9	9	7	8	8
IPR039417	Papain-like cysteine endopeptidase		5	22	9.68	21	8	8	8	8	7	9	7
IPR008921	DNA polymerase III, clamp loader complex, gamma/delta/delta subunit, C-terminal		5	9	3.96	8	5	6	10	9	6	8	9
IPR009053	Prefoldin		5	7	3.08	9	8	8	8	8	9	10	9
IPR036554	GHMP kinase, C-terminal domain superfamily		5	7	3.08	7	8	7	9	12	9	8	11
IPR008971	HSP40/DnaJ peptide-binding		5	13	5.72	9	11	9	9	10	6	9	10
IPR002123	Phospholipid/glycerol acyltransferase		5	13	5.72	11	7	9	8	9	8	9	9
IPR002939	Chaperone DnaJ, C-terminal		5	12	5.28	8	11	9	9	10	7	10	10
IPR007197	Radical SAM		5	12	5.28	7	8	10	12	11	9	10	9
IPR004038	Ribosomal protein eL8/eL30/eS12/Gadd45		5	5	2.2	7	6	6	10	10	10	12	12
IPR004160	Translation elongation factor EFTu/EF1A, C-terminal		5	4	1.76	4	5	3	10	10	12	12	12
IPR001452	SH3 domain		5	17	7.48	11	12	7	14	12	13	11	14
IPR036010	2Fe-2S ferredoxin-like superfamily		5	8	3.52	10	7	3	11	13	14	14	17
IPR036168	AP-2 complex subunit mu, C-terminal superfamily		5	14	6.16	5	6	7	15	16	12	13	14
IPR028565	Mu homology domain		5	12	5.28	5	5	5	15	16	12	13	14
IPR036986	RNA-binding S4 domain superfamily		5	8	3.52	8	5	6	12	16	13	13	15
IPR036028	SH3-like domain superfamily		5	17	7.48	11	13	7	17	15	15	14	14
IPR007657	Glycosyltransferase 61		5	4	1.76	8	6	14	15	17	11	16	19
IPR036855	Zinc finger, CCCH-type superfamily		5	47	20.68	17	20	17	16	19	13	19	21
IPR002401	Cytochrome P450, E-class, group I	aerobic metabolism	4	0	0	0	0	0	0	0	0	0	0
IPR010530	NADH-ubiquinone reductase complex 1 MLRQ subunit	aerobic metabolism	4	0	0	0	0	0	0	0	0	0	0
IPR040193	EF-hand domain-containing protein EFHC1/EFHC2/EFHB	Calcium	4	2	0.88	0	0	0	0	0	0	0	0
IPR004837	Sodium/calcium exchanger membrane region	calcium	4	4	1.76	7	6	7	6	5	5	5	5
IPR003929	Calcium-activated potassium channel BK, alpha subunit	Calcium activated ptoassium channel	4	1	0.44	0	0	0	0	0	0	0	0
IPR031649	Voltage-dependent L-type calcium channel, IQ-associated domain	Calcium channel	4	10	4.4	0	0	0	0	0	0	0	0
IPR012945	Tubulin binding cofactor C-like domain	tubulin	4	7	3.08	1	1	1	2	2	2	2	2
IPR004875	DDE superfamily endonuclease domain		4	29	12.76	16	1	6	44	0	0	0	0
IPR004217	Tim10-like		4	7	3.08	0	0	0	1	1	1	1	0
IPR035427	Tim10-like domain superfamily		4	7	3.08	0	0	0	1	1	1	1	0
IPR004942	Roadblock/LAMTOR2 domain		4	4	1.76	0	1	1	0	1	0	1	0
IPR010796	B9-type C2 domain		4	6	2.64	0	0	0	0	0	0	0	0
IPR022041	Farnesoic acid O-methyl transferase		4	7	3.08	3	0	0	0	0	0	0	0
IPR029041	FAD-linked oxidoreductase-like		4	7	3.08	1	2	2	0	0	0	0	0
IPR001750	NADH:quinone oxidoreductase/Mrp antiporter, membrane subunit		4	4	1.76	6	0	0	0	0	0	0	0
IPR001940	Peptidase S1C		4	2	0.88	1	1	1	0	0	0	0	0
IPR003903	Ubiquitin interacting motif		4	2	0.88	0	0	0	0	0	1	1	0
IPR005532	Sulfatase-modifying factor enzyme		4	1	0.44	1	1	1	0	0	0	0	0
IPR042095	Sulfatase-modifying factor enzyme superfamily		4	1	0.44	1	1	1	0	0	0	0	0
IPR000743	Glycoside hydrolase, family 28		4	0	0	1	1	1	0	0	0	0	0
IPR013767	PAS fold		4	0	0	0	0	0	0	0	0	0	1
IPR006558	LamG-like jellyroll fold		4	0	0	0	0	0	1	1	0	0	0
IPR002293	Amino acid/polyamine transporter I		4	0	0	0	0	0	0	0	0	0	0
IPR005814	Aminotransferase class-III		4	0	0	0	0	0	0	0	0	0	0
IPR007632	Anoctamin		4	0	0	0	0	0	0	0	0	0	0
IPR026050	C1GALT1/C1GALT1-specific chaperone 1		4	0	0	0	0	0	0	0	0	0	0
IPR008217	Ccc1 family		4	0	0	0	0	0	0	0	0	0	0
IPR036627	CobW-like, C-terminal domain superfamily		4	0	0	0	0	0	0	0	0	0	0
IPR047803	DCD1A/B-like		4	0	0	0	0	0	0	0	0	0	0
IPR006050	DNA photolyase, N-terminal		4	0	0	0	0	0	0	0	0	0	0
IPR022105	Domain of unknown function DUF3645		4	0	0	0	0	0	0	0	0	0	0
IPR044584	E3 ubiquitin-protein ligase KEG		4	0	0	0	0	0	0	0	0	0	0
IPR009078	Ferritin-like superfamily		4	0	0	0	0	0	0	0	0	0	0
IPR002053	Glycoside hydrolase, family 25		4	0	0	0	0	0	0	0	0	0	0
IPR004360	Glyoxalase/fosfomycin resistance/dioxygenase domain		4	0	0	0	0	0	0	0	0	0	0
IPR001910	Inosine/uridine-preferring nucleoside hydrolase domain		4	0	0	0	0	0	0	0	0	0	0
IPR010031	L-gulonolactone/D-arabinono-1,4-lactone oxidase-like		4	0	0	0	0	0	0	0	0	0	0
IPR040847	Mind bomb, SH3 repeat domain		4	0	0	0	0	0	0	0	0	0	0
IPR003644	Na-Ca exchanger/integrin-beta4		4	0	0	0	0	0	0	0	0	0	0
IPR036452	Ribonucleoside hydrolase-like		4	0	0	0	0	0	0	0	0	0	0
IPR030400	Sedolisin domain		4	0	0	0	0	0	0	0	0	0	0
IPR003819	TauD/TfdA-like domain		4	0	0	0	0	0	0	0	0	0	0
IPR042098	Taurine dioxygenase TauD-like superfamily		4	0	0	0	0	0	0	0	0	0	0
IPR002155	Thiolase		4	0	0	0	0	0	0	0	0	0	0
IPR020617	Thiolase, C-terminal		4	0	0	0	0	0	0	0	0	0	0
IPR020616	Thiolase, N-terminal		4	0	0	0	0	0	0	0	0	0	0
IPR000007	Tubby, C-terminal		4	11	4.84	1	1	1	2	2	1	1	2
IPR002220	DapA-like		4	5	2.2	1	1	1	1	1	1	1	1
IPR008269	Peptidase S16, Lon proteolytic domain		4	5	2.2	1	1	1	0	0	1	1	1
IPR004842	SLC12A transporter family		4	5	2.2	2	0	0	2	2	1	1	1
IPR004254	AdipoR/Haemolysin-III-related		4	4	1.76	1	1	1	3	3	2	1	1
IPR004841	Amino acid permease/ SLC12A domain		4	4	1.76	2	0	0	2	2	1	1	1
IPR033464	CSN8/PSMD8/EIF3K		4	3	1.32	1	1	1	3	3	0	1	1
IPR011057	Mss4-like superfamily		4	3	1.32	1	0	0	1	1	1	1	1
IPR036278	Sialidase superfamily		4	2	0.88	4	2	1	1	1	2	1	1
IPR006599	CARP motif		4	2	0.88	1	1	0	1	1	1	1	1
IPR036649	Inorganic pyrophosphatase superfamily		4	2	0.88	1	1	1	1	1	1	1	1
IPR032632	Peptidase M16, middle/third domain		4	1	0.44	2	2	1	1	1	1	1	1
IPR036543	Guanylate-binding protein, C-terminal domain superfamily		4	1	0.44	1	1	1	1	1	2	1	2
IPR011234	Fumarylacetoacetase-like, C-terminal		4	1	0.44	2	1	2	1	1	1	1	1
IPR017920	COMM domain		4	0	0	0	0	0	1	1	1	1	1
IPR002372	Pyrrolo-quinoline quinone repeat		4	0	0	0	1	1	0	0	1	1	1
IPR036155	Cryptochrome/photolyase, N-terminal domain superfamily		4	1	0.44	0	0	0	0	0	0	0	0
IPR017868	Filamin/ABP280 repeat-like		4	8	3.52	0	0	0	0	0	0	0	0
IPR001503	Glycosyl transferase family 10		4	25	11	0	0	0	0	0	0	0	0
IPR038577	GT10-like, C-terminal domain superfamily		4	25	11	0	0	0	0	0	0	0	0
IPR025789	Histone-lysine N-methyltransferase DOT1 domain		4	7	3.08	0	0	0	0	0	0	0	0
IPR028081	Leucine-binding protein domain		4	54	23.76	0	0	0	0	0	0	0	0
IPR006342	Methyltransferase FkbM		4	70	30.8	0	0	0	0	0	0	0	0
IPR049258	ODAD1, central coiled coil region		4	7	3.08	0	0	0	0	0	0	0	0
IPR002129	Pyridoxal phosphate-dependent decarboxylase		4	1	0.44	0	0	0	0	0	0	0	0
IPR000772	Ricin B, lectin domain		4	12	5.28	0	0	0	0	0	0	0	0
IPR018491	SLC12A transporter, C-terminal		4	5	2.2	0	0	0	0	0	0	0	0
IPR003663	Sugar/inositol transporter		4	12	5.28	6	5	6	2	1	2	2	2
IPR009010	Aspartate decarboxylase-like domain superfamily		4	5	2.2	2	0	0	3	5	1	2	2
IPR032781	ABC-transporter extension domain		4	4	1.76	3	1	2	3	3	1	2	1
IPR046348	SIS domain superfamily		4	3	1.32	3	1	1	2	2	2	2	2
IPR016151	DNA mismatch repair protein MutS, N-terminal		4	3	1.32	2	1	1	2	2	2	2	2
IPR035445	GYF-like domain superfamily		4	3	1.32	2	1	1	2	2	2	3	3
IPR003169	GYF domain		4	3	1.32	1	1	1	2	2	2	3	3
IPR042449	Ubiquitin-activating enzyme E1, inactive adenylation domain, subdomain 1		4	3	1.32	1	3	2	2	2	1	2	2
IPR019572	Ubiquitin-activating enzyme, SCCH domain		4	3	1.32	1	2	5	2	2	1	2	2
IPR001017	Dehydrogenase, E1 component		4	3	1.32	2	2	3	1	1	1	2	2
IPR027523	CLU domain containing protein		4	2	0.88	1	2	0	3	5	2	2	2
IPR036955	AP2/ERF domain superfamily		4	2	0.88	2	1	2	3	2	4	2	3
IPR016177	DNA-binding domain superfamily		4	2	0.88	2	1	2	3	2	4	2	3
IPR036860	SH2 domain superfamily		4	2	0.88	2	1	2	1	2	1	3	2
IPR011611	Carbohydrate kinase PfkB		4	2	0.88	1	1	1	2	2	2	2	2
IPR006674	HD domain		4	1	0.44	2	2	2	4	5	2	3	2
IPR019748	FERM central domain		4	1	0.44	1	1	1	2	3	2	2	2
IPR035963	FERM superfamily, second domain		4	0	0	1	1	1	2	3	2	2	2
IPR023610	Phosphatidylinositol-4/5-phosphate 5/4-kinase		4	6	2.64	3	5	3	2	3	2	2	2
IPR003152	FATC domain		4	6	2.64	3	5	3	3	2	2	2	2
IPR025995	RNA binding activity-knot of a chromodomain		4	4	1.76	2	2	3	2	4	2	3	4
IPR000357	HEAT repeat		4	4	1.76	6	1	1	1	1	4	5	4
IPR036273	CRAL/TRIO, N-terminal domain superfamily		4	2	0.88	3	4	2	4	4	2	2	2
IPR044770	Protein spinster-like		4	1	0.44	1	0	1	3	3	4	2	3
IPR046450	PA domain superfamily		4	20	8.8	2	3	3	4	3	4	3	2
IPR035994	Nucleoside phosphorylase superfamily		4	9	3.96	4	4	3	2	2	2	4	3
IPR006439	HAD hydrolase, subfamily IA		4	8	3.52	4	3	3	2	2	3	3	1
IPR006145	Pseudouridine synthase, RsuA/RluA-like		4	7	3.08	3	7	5	1	3	2	2	3
IPR000845	Nucleoside phosphorylase domain		4	6	2.64	4	4	3	2	2	2	4	3
IPR001263	Phosphoinositide 3-kinase, accessory (PIK) domain		4	6	2.64	5	2	3	3	3	2	4	3
IPR042236	Phosphoinositide 3-kinase, accessory (PIK) domain superfamily		4	6	2.64	5	2	3	3	3	2	4	3
IPR020095	Pseudouridine synthase I, TruA, C-terminal		4	5	2.2	3	3	3	2	3	2	3	3
IPR002687	Nop domain		4	5	2.2	3	2	2	3	4	2	4	4
IPR036070	Nop domain superfamily		4	5	2.2	3	2	2	3	4	2	4	4
IPR005788	Protein disulfide-isomerase, thioredoxin-like domain		4	5	2.2	4	2	1	4	3	3	3	3
IPR010614	RAD3-like helicase, DEAD		4	5	2.2	4	3	2	2	4	2	3	5
IPR036837	Cation efflux protein, cytoplasmic domain superfamily		4	4	1.76	4	3	2	3	2	3	4	4
IPR001406	Pseudouridine synthase I, TruA		4	4	1.76	3	4	3	2	3	2	3	3
IPR036678	MutS, connector domain superfamily		4	4	1.76	4	2	3	4	3	3	3	3
IPR013714	Golgi apparatus membrane protein TVP15		4	4	1.76	3	2	0	3	3	3	3	3
IPR012976	NOSIC		4	4	1.76	3	2	2	3	4	2	4	4
IPR042239	Nop, C-terminal domain		4	4	1.76	3	2	2	3	4	2	4	4
IPR003097	Sulfite reductase [NADPH] flavoprotein alpha-component-like, FAD-binding		4	3	1.32	3	3	0	2	2	4	4	4
IPR001709	Flavoprotein pyridine nucleotide cytochrome reductase		4	3	1.32	3	3	0	2	2	4	4	4
IPR036705	ADP-ribosylation/Crystallin J1 superfamily		4	3	1.32	1	0	1	3	4	5	5	3
IPR036570	HORMA domain superfamily		4	3	1.32	3	2	3	3	2	2	3	4
IPR005502	ADP-ribosylation/Crystallin J1		4	3	1.32	0	0	0	3	4	5	5	3
IPR046346	Aminoacid dehydrogenase-like, N-terminal domain superfamily		4	2	0.88	3	5	3	4	4	2	3	3
IPR047794	Peptidase C45-like		4	1	0.44	3	1	0	3	3	3	3	3
IPR002528	Multi antimicrobial extrusion protein		4	0	0	6	2	4	3	4	1	2	3
IPR023211	DNA polymerase, palm domain superfamily		4	29	12.76	5	3	5	2	3	4	3	4
IPR006172	DNA-directed DNA polymerase, family B		4	24	10.56	5	1	4	2	2	4	3	4
IPR029019	Beta-hexosaminidase, eukaryotic type, N-terminal		4	12	5.28	10	8	6	3	3	3	4	3
IPR036279	5'-3' exonuclease, C-terminal domain superfamily		4	7	3.08	3	2	4	4	3	3	5	4
IPR006085	XPG, N-terminal		4	6	2.64	3	2	4	4	3	3	5	4
IPR001607	Zinc finger, UBP-type		4	5	2.2	5	4	4	1	2	4	3	1
IPR006084	XPG/Rad2 endonuclease		4	5	2.2	3	3	4	5	3	3	5	4
IPR042087	DNA polymerase family B, thumb domain		4	4	1.76	4	4	3	2	2	4	3	4
IPR027141	Like-Sm (LSM) domain containing protein, LSm4/SmD1/SmD3		4	3	1.32	4	5	3	3	4	4	3	3
IPR037196	HSP90, C-terminal domain		4	3	1.32	4	3	3	3	5	3	4	4
IPR001440	Tetratricopeptide repeat 1		4	31	13.64	8	6	9	4	4	4	4	3
IPR008930	Terpenoid cyclases/protein prenyltransferase alpha-alpha toroid		4	21	9.24	4	4	4	4	5	4	4	6
IPR015847	Exoribonuclease, phosphorolytic domain 2		4	7	3.08	5	4	4	5	4	3	3	4
IPR029001	Inosine triphosphate pyrophosphatase-like		4	7	3.08	4	4	4	4	5	4	4	4
IPR015415	Spastin/Vps4, C-terminal		4	7	3.08	3	4	2	5	8	3	4	5
IPR046952	Glutathione reductase/thioredoxin reductase-like		4	6	2.64	3	2	4	4	3	4	4	4
IPR015720	Transmembrane emp24 domain-containing protein		4	6	2.64	5	2	2	5	5	2	4	4
IPR013784	Carbohydrate-binding-like fold		4	5	2.2	2	2	1	4	4	4	4	4
IPR045028	Helicase superfamily 1/2, DinG/Rad3-like		4	5	2.2	4	7	2	4	5	3	3	6
IPR006086	XPG-I domain		4	5	2.2	4	2	4	5	3	3	5	4
IPR001222	Zinc finger, TFIIS-type		4	5	2.2	4	3	3	3	4	4	4	4
IPR006134	DNA-directed DNA polymerase, family B, multifunctional domain		4	4	1.76	5	6	4	2	3	4	3	4
IPR025313	Domain of unknown function DUF4217		4	4	1.76	4	4	3	4	4	2	5	4
IPR032710	NTF2-like domain superfamily		4	4	1.76	3	4	2	4	5	4	4	4
IPR021151	GINS subunit, domain A		4	4	1.76	4	3	4	6	6	3	4	4
IPR036224	GINS, helical bundle-like domain superfamily		4	4	1.76	4	3	4	6	6	4	4	4
IPR001404	Heat shock protein Hsp90 family		4	3	1.32	4	3	4	3	5	3	4	4
IPR034804	Fumarate reductase/succinate dehydrogenase, transmembrane subunit		4	3	1.32	3	0	1	4	4	4	4	4
IPR002305	Aminoacyl-tRNA synthetase, class Ic		4	9	3.96	5	5	3	4	4	5	5	4
IPR013041	Clathrin adaptor, appendage, Ig-like subdomain superfamily		4	9	3.96	4	4	2	6	5	4	5	5
IPR047854	Replication factor C, lid domain		4	8	3.52	4	5	4	7	7	4	4	5
IPR007248	Mpv17/PMP22		4	7	3.08	3	4	3	5	6	3	7	5
IPR018163	Threonyl/alanyl tRNA synthetase, class II-like, putative editing domain superfamily		4	6	2.64	9	3	5	3	3	5	4	5
IPR005811	ATP-citrate synthase/succinyl-CoA ligase, C-terminal domain		4	4	1.76	3	4	2	5	5	5	5	4
IPR004240	Nonaspanin (TM9SF)		4	13	5.72	6	2	4	4	5	6	5	6
IPR036174	Zinc finger, Sec23/Sec24-type superfamily		4	7	3.08	5	4	2	6	7	3	5	8
IPR011330	Glycoside hydrolase/deacetylase, beta/alpha-barrel		4	7	3.08	6	4	7	6	5	4	2	5
IPR036603	RNA polymerase, RBP11-like subunit		4	6	2.64	4	5	5	5	6	4	5	5
IPR001714	Peptidase M24, methionine aminopeptidase		4	5	2.2	5	3	4	6	6	5	5	7
IPR002777	Prefoldin beta-like		4	4	1.76	5	5	5	5	5	4	5	4
IPR006594	LIS1 homology motif		4	4	1.76	2	1	2	5	5	5	5	5
IPR000462	CDP-alcohol phosphatidyltransferase		4	4	1.76	5	6	3	5	6	5	5	4
IPR003954	RNA recognition motif domain, eukaryote		4	10	4.4	5	3	2	9	11	6	8	5
IPR045063	Dynamin, N-terminal		4	8	3.52	3	4	3	6	5	7	9	7
IPR042855	v-SNARE, coiled-coil homology domain		4	10	4.4	4	5	4	6	6	7	7	6
IPR016635	Adaptor protein complex, sigma subunit		4	9	3.96	6	6	5	8	8	7	6	6
IPR003958	Transcription factor CBF/NF-Y/archaeal histone domain		4	8	3.52	6	6	4	8	7	6	7	6
IPR036345	Exoribonuclease, PH domain 2 superfamily		4	7	3.08	6	6	5	6	6	5	5	6
IPR010935	SMCs flexible hinge		4	6	2.64	4	5	3	6	6	6	6	6
IPR036277	SMCs flexible hinge superfamily		4	6	2.64	4	5	3	10	12	6	6	7
IPR000362	Fumarate lyase family		4	4	1.76	3	2	2	6	6	6	6	6
IPR022761	Fumarate lyase, N-terminal		4	4	1.76	4	2	2	6	6	6	6	6
IPR041095	Elongation Factor G, domain II		4	4	1.76	5	5	3	6	6	6	6	6
IPR016095	Large ribosomal subunit protein uL1, 3-layer alpha/beta-sandwich domain		4	4	1.76	3	3	2	8	9	6	7	6
IPR024083	Fumarase/histidase, N-terminal		4	3	1.32	4	2	2	7	7	6	6	6
IPR028364	Ribosomal protein uL1/ribosomal biogenesis protein		4	4	1.76	3	3	2	9	10	7	8	6
IPR023674	Ribosomal protein uL1-like		4	4	1.76	3	3	2	9	10	7	8	6
IPR001382	Glycoside hydrolase family 47		4	26	11.44	4	7	4	7	9	7	6	7
IPR036026	Seven-hairpin glycosidases		4	26	11.44	4	7	4	7	9	7	6	8
IPR043154	Sec1-like, domain 1		4	11	4.84	6	4	5	8	9	7	7	8
IPR039361	Cyclin		4	10	4.4	6	3	5	5	8	8	8	8
IPR006680	Amidohydrolase-related		4	6	2.64	7	6	4	8	9	6	7	7
IPR011658	PA14 domain		4	74	32.56	7	6	12	9	8	1	3	9
IPR001619	Sec1-like protein		4	15	6.6	5	7	7	8	9	7	8	8
IPR024977	Anaphase-promoting complex subunit 4-like, WD40 domain		4	14	6.16	7	9	7	4	3	8	8	9
IPR036045	Sec1-like superfamily		4	16	7.04	8	9	7	8	9	7	8	8
IPR013201	Cathepsin propeptide inhibitor domain (I29)		4	16	7.04	21	8	8	8	7	8	10	7
IPR027482	Sec1-like, domain 2		4	15	6.6	6	8	6	8	9	7	8	8
IPR001494	Importin-beta, N-terminal domain		4	12	5.28	12	12	13	7	6	7	9	6
IPR002554	Protein phosphatase 2A, regulatory B subunit, B56		4	12	5.28	4	2	3	10	10	9	9	8
IPR005482	Biotin carboxylase, C-terminal		4	3	1.32	7	3	4	8	9	11	11	10
IPR009014	Transketolase C-terminal/Pyruvate-ferredoxin oxidoreductase domain II		4	7	3.08	9	8	2	8	9	13	15	11
IPR005481	Biotin carboxylase-like, N-terminal domain		4	3	1.32	7	3	4	9	9	11	11	10
IPR013763	Cyclin-like domain		4	13	5.72	13	7	9	9	10	9	10	12
IPR001392	Clathrin adaptor, mu subunit		4	10	4.4	4	4	5	13	14	9	11	12
IPR016102	Succinyl-CoA synthetase-like		4	5	2.2	5	5	4	12	11	10	10	10
IPR004274	FCP1 homology domain		4	15	6.6	7	4	4	11	13	12	10	15
IPR001958	Tetracycline resistance protein TetA/multidrug resistance protein MdtG-like		4	15	6.6	30	11	14	12	12	14	11	12
IPR012678	Ribosomal protein uL23/eL15/eS24 core domain superfamily		4	5	2.2	5	3	3	16	16	10	14	17
IPR002108	Actin-depolymerising factor homology domain	Actin	3	3	1.32	4	4	3	3	3	2	2	3
IPR002403	Cytochrome P450, E-class, group IV	aerobic metabolism	3	0	0	0	0	0	0	0	0	0	0
IPR006769	Calcium uniporter protein, C-terminal	Calcium	3	0	0	0	0	0	0	0	0	0	0
IPR045198	Calcineurin B-like	Calcium	3	2	0.88	1	1	1	1	1	1	1	1
IPR040441	Cilia- and flagella-associated protein 20/CFAP20DC	cilia/flagella	3	5	2.2	1	1	1	0	0	0	0	0
IPR033253	Cilia- and flagella-associated protein 45	cilia/flagella	3	2	0.88	0	0	0	0	0	0	0	0
IPR049270	Cilia- and flagella-associated protein 58, central coiled coil	cilia/flagella	3	5	2.2	0	0	0	0	0	0	0	0
IPR019347	Axonemal dynein light chain	Dynein	3	6	2.64	0	0	0	0	0	0	0	0
IPR039750	Dynein regulatory complex protein	Dynein	3	4	1.76	0	0	0	0	0	0	0	0
IPR039505	Dynein regulatory complex protein 1/2, N-terminal	Dynein	3	3	1.32	0	0	0	0	0	0	0	0
IPR033192	Outer dynein arm-docking complex subunit 3	Dynein	3	2	0.88	0	0	0	0	0	0	0	0
IPR003131	Potassium channel tetramerisation-type BTB domain	Potassium channel	3	7	3.08	17	3	10	1	1	1	1	0
IPR002453	Beta tubulin	tubulin	3	10	4.4	1	1	1	3	4	3	4	4
IPR045877	RNA-binding protein ZFP36-like		3	7	3.08	0	2	0	0	0	0	0	0
IPR007714	CFA20 domain		3	6	2.64	1	1	1	0	0	0	0	0
IPR010441	CH-like domain in sperm protein		3	6	2.64	0	0	0	1	1	0	0	0
IPR047115	Arylsulfatase B		3	5	2.2	4	1	2	0	0	0	0	0
IPR014743	Chloride channel, core		3	5	2.2	2	3	2	0	0	0	0	0
IPR001807	Chloride channel, voltage gated		3	5	2.2	2	3	1	0	0	0	0	0
IPR003171	Methylenetetrahydrofolate reductase-like		3	4	1.76	1	2	2	0	0	0	0	0
IPR004709	Na+/H+ exchanger		3	2	0.88	0	0	0	0	0	0	0	1
IPR000120	Amidase		3	1	0.44	1	1	2	0	0	0	0	0
IPR023296	Glycosyl hydrolase, five-bladed beta-propellor domain superfamily		3	1	0.44	1	1	0	0	0	0	0	0
IPR043504	Peptidase S1, PA clan, chymotrypsin-like fold		3	1	0.44	0	2	1	0	0	0	0	0
IPR026898	Intramembrane metalloprotease PrsW		3	0	0	1	1	1	0	0	0	0	0
IPR037151	Alpha-ketoglutarate-dependent dioxygenase AlkB-like superfamily		3	0	0	1	0	0	0	0	0	0	0
IPR013936	Chloroquine-resistance transporter-like		3	0	0	1	1	0	0	0	0	0	0
IPR002938	FAD-binding domain		3	0	0	0	0	0	0	0	0	0	1
IPR032387	Acetyl-coenzyme A synthetase, N-terminal domain		3	0	0	0	0	0	0	0	0	0	0
IPR002912	ACT domain		3	0	0	0	0	0	0	0	0	0	0
IPR012258	Acyl-CoA oxidase		3	0	0	0	0	0	0	0	0	0	0
IPR049449	Acyl-CoA thioesterase-like, N-terminal HotDog domain		3	0	0	0	0	0	0	0	0	0	0
IPR042171	Acyl-CoA thioesterase, double hotdog domain		3	0	0	0	0	0	0	0	0	0	0
IPR029320	Acyl-coenzyme A oxidase, N-terminal		3	0	0	0	0	0	0	0	0	0	0
IPR038417	Alpha-galactosidase, N-terminal domain superfamily		3	0	0	0	0	0	0	0	0	0	0
IPR002575	Aminoglycoside phosphotransferase		3	0	0	0	0	0	0	0	0	0	0
IPR007803	Aspartyl/asparaginy/proline hydroxylase		3	0	0	0	0	0	0	0	0	0	0
IPR036426	Bulb-type lectin domain superfamily		3	0	0	0	0	0	0	0	0	0	0
IPR024983	CHAT domain		3	0	0	0	0	0	0	0	0	0	0
IPR005101	Cryptochrome/DNA photolyase, FAD-binding domain		3	0	0	0	0	0	0	0	0	0	0
IPR007173	D-arabinono-1,4-lactone oxidase, C-terminal domain		3	0	0	0	0	0	0	0	0	0	0
IPR001873	Epithelial sodium channel		3	0	0	0	0	0	0	0	0	0	0
IPR033118	EXPERA domain		3	0	0	0	0	0	0	0	0	0	0
IPR016167	FAD-binding, type PCMH, subdomain 1		3	0	0	0	0	0	0	0	0	0	0
IPR037721	Ferlin family		3	0	0	0	0	0	0	0	0	0	0
IPR012349	FMN-binding split barrel		3	0	0	0	0	0	0	0	0	0	0
IPR037120	Haem peroxidase domain superfamily, animal type		3	0	0	0	0	0	0	0	0	0	0
IPR019791	Haem peroxidase, animal-type		3	0	0	0	0	0	0	0	0	0	0
IPR001320	Ionotropic glutamate receptor, C-terminal		3	0	0	0	0	0	0	0	0	0	0
IPR024084	Isopropylmalate dehydrogenase-like domain		3	0	0	0	0	0	0	0	0	0	0
IPR039055	MCU family		3	0	0	0	0	0	0	0	0	0	0
IPR006685	Mechanosensitive ion channel MscS		3	0	0	0	0	0	0	0	0	0	0
IPR016688	Mechanosensitive ion channel MscS-like, plants/fungi		3	0	0	0	0	0	0	0	0	0	0
IPR023408	Mechanosensitive ion channel MscS, beta-domain superfamily		3	0	0	0	0	0	0	0	0	0	0
IPR038727	NadR/Ttd14, AAA domain		3	0	0	0	0	0	0	0	0	0	0
IPR003293	Nudix hydrolase 6-like		3	0	0	0	0	0	0	0	0	0	0
IPR005178	Organic solute transporter subunit alpha/Transmembrane protein 184		3	0	0	0	0	0	0	0	0	0	0
IPR004963	Pectinacetylesterase/NOTUM		3	0	0	0	0	0	0	0	0	0	0
IPR015366	Peptidase S53, activation domain		3	0	0	0	0	0	0	0	0	0	0
IPR003736	Phenylacetic acid degradation-related domain		3	0	0	0	0	0	0	0	0	0	0
IPR008775	Phytanoyl-CoA dioxygenase-like		3	0	0	0	0	0	0	0	0	0	0
IPR045054	Prolyl 4-hydroxylase		3	0	0	0	0	0	0	0	0	0	0
IPR000612	Proteolipid membrane potential modulator		3	0	0	0	0	0	0	0	0	0	0
IPR028202	Reductase, C-terminal		3	0	0	0	0	0	0	0	0	0	0
IPR049039	Regulator of microtubule dynamics protein 1-3, alpha helical repeats		3	0	0	0	0	0	0	0	0	0	0
IPR041373	Reverse transcriptase, RNase H-like domain		3	0	0	0	0	0	0	0	0	0	0
IPR005097	Saccharopine dehydrogenase, NADP binding domain		3	0	0	0	0	0	0	0	0	0	0
IPR007036	Succinylglutamate desuccinylase/aspartoacylase		3	0	0	0	0	0	0	0	0	0	0
IPR026749	Transmembrane protein 135		3	0	0	0	0	0	0	0	0	0	0
IPR045150	Transmembrane reductase CYB561D1/2		3	0	0	0	0	0	0	0	0	0	0
IPR000537	UbiA prenyltransferase family		3	0	0	0	0	0	0	0	0	0	0
IPR016171	Vanillyl-alcohol oxidase, C-terminal subdomain 2		3	0	0	0	0	0	0	0	0	0	0
IPR029489	O-GlcNAc transferase, C-terminal		3	13	5.72	0	0	0	1	1	1	1	1
IPR036867	R3H domain superfamily		3	8	3.52	1	1	1	3	3	1	1	1
IPR027065	Lon protease		3	8	3.52	1	2	1	0	0	1	1	1
IPR006214	Bax inhibitor 1-related		3	8	3.52	1	0	0	2	2	1	1	2
IPR001012	UBX domain		3	5	2.2	2	1	2	1	1	2	1	1
IPR042856	Radial spoke protein 14		3	5	2.2	0	0	1	1	1	1	1	0
IPR036881	Glycoside hydrolase family 3 C-terminal domain superfamily		3	4	1.76	7	3	5	1	1	0	0	1
IPR002772	Glycoside hydrolase family 3 C-terminal domain		3	4	1.76	7	3	4	1	1	0	0	1
IPR001282	Glucose-6-phosphate dehydrogenase		3	4	1.76	1	0	2	1	1	1	1	1
IPR022675	Glucose-6-phosphate dehydrogenase, C-terminal		3	4	1.76	1	0	2	1	1	1	1	1
IPR001764	Glycoside hydrolase, family 3, N-terminal		3	3	1.32	7	4	2	1	1	0	0	1
IPR036962	Glycoside hydrolase, family 3, N-terminal domain superfamily		3	3	1.32	7	4	4	1	1	0	0	1
IPR000436	Sushi/SCR/CCP domain		3	3	1.32	9	5	4	1	1	0	0	1
IPR013792	RNA 3'-terminal phosphate cyclase/enolpyruvate transferase, alpha/beta		3	3	1.32	1	1	1	1	1	2	1	1
IPR037143	4'-phosphopantetheinyl transferase domain superfamily		3	3	1.32	3	1	1	1	1	1	2	2
IPR008278	4'-phosphopantetheinyl transferase domain		3	3	1.32	3	1	1	1	1	1	2	2
IPR044611	Ubiquitin-protein ligase E3A/B/C-like		3	3	1.32	1	0	2	1	1	0	1	1
IPR043151	Bromo adjacent homology (BAH) domain superfamily		3	3	1.32	1	1	1	1	1	1	0	1
IPR022674	Glucose-6-phosphate dehydrogenase, NAD-binding		3	3	1.32	1	0	1	1	1	1	1	1
IPR017437	ATP-NAD kinase, PpnK-type, C-terminal		3	3	1.32	2	2	2	1	1	0	1	1
IPR026891	Fibronectin type III-like domain		3	2	0.88	7	2	1	1	1	0	0	1
IPR002716	PIN domain		3	2	0.88	2	2	0	1	1	1	1	1
IPR023318	Ubiquitin activating enzyme, alpha domain superfamily		3	2	0.88	2	2	1	1	1	1	1	1
IPR011040	Sialidase		3	2	0.88	3	2	1	1	1	2	1	1
IPR002634	BolA protein		3	2	0.88	1	0	0	1	1	1	1	1
IPR036065	BolA-like superfamily		3	2	0.88	1	0	0	1	1	1	1	1
IPR039726	Pre-mRNA-processing factor Prp40		3	2	0.88	1	0	1	1	1	1	1	1
IPR045046	Vacuolar protein sorting-associated protein 9-like		3	2	0.88	1	1	1	1	2	2	3	1
IPR024072	Dihydrofolate reductase-like domain superfamily		3	2	0.88	3	2	2	1	1	1	1	1
IPR008162	Inorganic pyrophosphatase		3	2	0.88	1	1	1	1	1	1	1	1
IPR030700	N-end rule aminoacyl transferase		3	1	0.44	4	0	1	1	1	1	1	1
IPR001977	Dephospho-CoA kinase		3	1	0.44	1	0	1	1	0	1	1	0
IPR002420	C2 phosphatidylinositol 3-kinase-type domain		3	1	0.44	1	0	0	0	1	1	1	1
IPR016563	Nuclear protein localization protein 4		3	1	0.44	1	2	2	1	1	0	0	1
IPR007717	Nuclear pore localisation protein NPL4, C-terminal		3	1	0.44	1	1	2	1	1	0	0	1
IPR001025	Bromo adjacent homology (BAH) domain		3	1	0.44	1	1	1	1	1	1	0	1
IPR004835	Chitin synthase		3	1	0.44	1	1	1	1	1	1	1	1
IPR011037	Pyruvate kinase-like, insert domain superfamily		3	1	0.44	2	1	1	1	1	1	1	1
IPR000889	Glutathione peroxidase		3	1	0.44	1	0	1	0	0	1	1	2
IPR007704	GPI mannosyltransferase 1		3	0	0	1	0	1	1	0	1	1	1
IPR044913	P-type trefoil domain superfamily		3	0	0	6	2	1	1	0	0	1	0
IPR000519	P-type trefoil domain		3	0	0	6	2	1	1	0	0	1	0
IPR000683	Gfo/Idh/MocA-like oxidoreductase, N-terminal		3	0	0	1	1	1	1	1	2	2	2
IPR042208	D-serine dehydratase-like domain superfamily		3	0	0	1	1	1	1	1	1	1	1
IPR000819	Peptidase M17, leucyl aminopeptidase, C-terminal		3	0	0	1	4	4	1	1	1	1	1
IPR011356	Peptidase M17, leucine aminopeptidase/peptidase B		3	0	0	1	4	3	1	1	1	1	1
IPR000639	Epoxide hydrolase-like		3	0	0	0	0	0	1	1	1	1	1
IPR043533	Cyclic nucleotide-binding domain-containing protein 1/2		3	4	1.76	0	0	0	0	0	0	0	0
IPR039785	Deubiquitinating enzyme MINDY-3/4		3	6	2.64	0	0	0	0	0	0	0	0
IPR025257	Deubiquitinating enzyme MINDY-3/4, conserved domain		3	6	2.64	0	0	0	0	0	0	0	0
IPR025252	Domain of unknown function DUF4200		3	3	1.32	0	0	0	0	0	0	0	0
IPR008333	Flavoprotein pyridine nucleotide cytochrome reductase-like, FAD-binding domain		3	1	0.44	0	0	0	0	0	0	0	0
IPR005108	HELP		3	5	2.2	0	0	0	0	0	0	0	0
IPR030392	Intramolecular chaperone auto-processing domain		3	3	1.32	0	0	0	0	0	0	0	0
IPR019399	Parkin co-regulated protein		3	5	2.2	0	0	0	0	0	0	0	0
IPR000534	Semialdehyde dehydrogenase, NAD-binding		3	2	0.88	0	0	0	0	0	0	0	0
IPR013830	SGNH hydrolase-type esterase domain		3	8	3.52	0	0	0	0	0	0	0	0
IPR008907	Tubulin polymerization-promoting protein		3	7	3.08	0	0	0	0	0	0	0	0
IPR006990	Tweety		3	1	0.44	0	0	0	0	0	0	0	0
IPR003603	U2A'/phosphoprotein 32 family A, C-terminal		3	1	0.44	0	0	0	0	0	0	0	0
IPR045156	Vacuolar protein 8		3	3	1.32	0	0	0	0	0	0	0	0
IPR035959	RutC-like superfamily		3	4	1.76	2	2	0	0	0	2	2	1
IPR012308	DNA ligase, ATP-dependent, N-terminal		3	3	1.32	2	1	1	2	1	2	1	2
IPR018149	Lysyl-tRNA synthetase, class II, C-terminal		3	3	1.32	2	2	1	1	2	1	2	1
IPR034164	Pepsin-like domain		3	0	0	7	1	1	3	2	1	1	3
IPR003323	OTU domain		3	12	5.28	2	2	2	1	1	2	2	2
IPR014782	Peptidase M1, membrane alanine aminopeptidase		3	9	3.96	4	1	1	2	2	2	2	2
IPR017946	PLC-like phosphodiesterase, TIM beta/alpha-barrel domain superfamily		3	9	3.96	4	3	3	2	2	2	2	2
IPR045357	Aminopeptidase N-like , N-terminal domain		3	8	3.52	2	1	1	2	2	2	2	2
IPR008918	Helix-hairpin-helix motif, class 2		3	7	3.08	3	2	4	1	1	1	2	3
IPR003151	PIK-related kinase, FAT		3	7	3.08	1	3	2	1	2	4	3	2
IPR014746	Glutamine synthetase/guanido kinase, catalytic domain		3	6	2.64	4	4	3	2	2	2	2	2
IPR023170	Helix-hairpin-helix, base-excision DNA repair, C-terminal		3	6	2.64	3	3	3	2	2	2	2	2
IPR012961	ATP-dependent RNA helicase Ski2/MTR4, C-terminal		3	6	2.64	2	2	2	1	2	2	2	2
IPR022644	Orn/DAP/Arg decarboxylase 2, N-terminal		3	5	2.2	7	5	3	2	2	2	2	2
IPR032640	AMP-activated protein kinase, glycogen-binding domain		3	5	2.2	3	4	4	2	2	2	2	2
IPR003265	HhH-GPD domain		3	5	2.2	4	3	4	2	2	2	2	2
IPR000744	NSF attachment protein		3	5	2.2	2	5	1	2	2	2	2	3
IPR000183	Ornithine/DAP/Arg decarboxylase		3	4	1.76	6	4	3	2	2	2	2	2
IPR012310	DNA ligase, ATP-dependent, central		3	4	1.76	2	3	1	2	3	2	1	2
IPR002298	DNA polymerase A		3	4	1.76	2	1	2	1	0	2	2	2
IPR001098	DNA-directed DNA polymerase, family A, palm domain		3	4	1.76	2	1	2	1	0	2	2	2
IPR005612	CCAAT-binding factor		3	4	1.76	3	2	2	2	2	2	3	3
IPR007695	DNA mismatch repair protein MutS-like, N-terminal		3	3	1.32	2	1	1	2	2	2	2	2
IPR005654	ATPase, AFG1-like		3	3	1.32	3	3	4	2	2	2	2	2
IPR036599	DNA ligase, ATP-dependent, N-terminal domain superfamily		3	3	1.32	2	2	1	2	1	2	1	2
IPR032678	tRNA synthetases class I, catalytic domain		3	3	1.32	2	2	2	2	2	1	2	2
IPR013719	Histone chaperone RTT106/FACT complex subunit SPT16-like, middle domain		3	3	1.32	2	2	2	2	2	3	4	3
IPR024969	EIF3F/CSN6-like, C-terminal		3	3	1.32	2	2	3	2	2	2	2	2
IPR035996	Tetrapyrrole methylase superfamily		3	3	1.32	1	1	1	2	2	2	2	2
IPR014777	Tetrapyrrole methylase, subdomain 1		3	3	1.32	1	1	1	2	2	2	2	2
IPR036038	Aminotransferase-like, PLP-dependent enzymes		3	3	1.32	2	1	1	2	2	2	2	3
IPR002833	Peptidyl-tRNA hydrolase, PTH2		3	3	1.32	2	2	1	2	2	1	2	2
IPR023476	Peptidyl-tRNA hydrolase II domain superfamily		3	3	1.32	2	2	1	2	2	1	2	2
IPR000011	Ubiquitin/SUMO-activating enzyme E1-like		3	3	1.32	1	3	1	2	2	1	2	2
IPR042302	Ubiquitin-activating enzyme E1, FCCH domain superfamily		3	3	1.32	1	3	1	2	2	1	2	2
IPR000760	Inositol monophosphatase-like		3	3	1.32	2	3	2	1	2	2	1	2
IPR036914	Methylglyoxal synthase-like domain superfamily		3	3	1.32	2	2	3	1	2	2	2	1
IPR011607	Methylglyoxal synthase-like domain		3	3	1.32	2	2	3	1	2	2	2	1
IPR000092	Polyprenyl synthetase		3	3	1.32	1	2	2	3	5	2	2	1
IPR033443	Pentacotripeptide-repeat region of PRORP		3	3	1.32	0	1	2	2	2	2	3	4
IPR049163	DNA helicase Pif1-like, 2B domain		3	2	0.88	51	1	1	2	2	1	2	4
IPR010285	DNA helicase Pif1-like		3	2	0.88	52	1	1	2	2	2	2	4
IPR001104	3-oxo-5-alpha-steroid 4-dehydrogenase, C-terminal		3	2	0.88	3	3	2	1	1	1	2	2
IPR002717	Histone acetyltransferase domain, MYST-type		3	2	0.88	2	2	2	2	2	2	2	3
IPR040706	MYST, zinc finger domain		3	2	0.88	2	2	2	2	2	2	2	3
IPR001130	3'-5' ssDNA/RNA exonuclease TatD-like		3	2	0.88	2	3	3	2	2	2	2	2
IPR002467	Peptidase M24A, methionine aminopeptidase, subfamily 1		3	2	0.88	3	1	1	2	2	2	2	2
IPR002303	Valine-tRNA ligase		3	2	0.88	2	1	2	3	2	2	1	2
IPR018499	Tetraspanin/Peripherin		3	2	0.88	4	5	2	1	1	1	2	2
IPR001471	AP2/ERF domain		3	2	0.88	2	1	2	2	2	4	2	3
IPR003128	Villin headpiece		3	2	0.88	2	1	2	3	3	2	2	2
IPR036886	Villin headpiece domain superfamily		3	2	0.88	2	1	2	3	3	2	2	2
IPR002058	PAP/25A-associated		3	2	0.88	2	2	2	2	2	2	2	2
IPR045092	Exosome complex exonuclease Rrp6-like		3	2	0.88	1	2	0	1	2	4	2	2
IPR042226	eRF1, domain 2 superfamily		3	2	0.88	2	2	0	3	3	2	2	3
IPR000878	Tetrapyrrole methylase		3	2	0.88	1	1	1	2	2	2	2	2
IPR014776	Tetrapyrrole methylase, subdomain 2		3	2	0.88	1	1	1	2	2	2	2	2
IPR015854	ABC transporter, lipoprotein release, LolD-like		3	2	0.88	3	2	2	1	2	2	1	1
IPR007123	Gelsolin-like domain		3	2	0.88	1	2	1	3	3	2	2	2
IPR039357	3-oxo-5-alpha-steroid 4-dehydrogenase/very-long-chain enoyl-CoA reductase		3	1	0.44	3	5	2	1	1	1	2	2
IPR005141	eRF1 domain 2		3	1	0.44	2	2	0	3	3	2	2	3
IPR001608	Alanine racemase, N-terminal		3	1	0.44	1	2	2	2	2	2	2	2
IPR036237	Xylose isomerase-like superfamily		3	0	0	2	3	2	2	2	0	1	2
IPR025875	Leucine rich repeat 4		3	19	8.36	3	2	1	3	3	1	2	3
IPR004367	Cyclin, C-terminal domain		3	9	3.96	3	2	3	1	3	2	2	6
IPR005599	GPI mannosyltransferase		3	6	2.64	4	4	3	2	2	3	2	2
IPR022310	NAD/GMP synthase		3	3	1.32	2	2	2	3	3	4	4	1
IPR013507	DNA mismatch repair protein, S5 domain 2-like		3	3	1.32	3	1	3	2	2	3	2	3
IPR045257	Dihydrolipoamide acetyltransferase/Pyruvate dehydrogenase protein X component		3	3	1.32	2	2	1	4	3	3	3	2
IPR010721	Probable O-methyltransferase UstE-like		3	1	0.44	2	1	1	5	3	2	3	3
IPR000560	Histidine phosphatase superfamily, clade-2		3	17	7.48	3	2	1	3	3	3	3	4
IPR003595	Protein-tyrosine phosphatase, catalytic		3	12	5.28	3	2	2	4	3	2	4	3
IPR019410	Lysine methyltransferase		3	10	4.4	3	3	2	4	3	2	4	3
IPR027268	Peptidase M4/M1, CTD superfamily		3	9	3.96	5	2	2	3	3	3	3	3
IPR023179	GTP-binding protein, orthogonal bundle domain superfamily		3	9	3.96	2	3	1	3	4	2	4	3
IPR036815	14-3-3 domain superfamily		3	9	3.96	3	2	3	4	5	4	3	3
IPR042097	Aminopeptidase N-like , N-terminal domain superfamliy		3	9	3.96	3	2	2	3	3	3	3	3
IPR023410	14-3-3 domain		3	8	3.52	2	1	2	4	5	4	3	3
IPR000866	Alkyl hydroperoxide reductase subunit C/ Thiol specific antioxidant		3	7	3.08	9	2	3	3	3	3	4	3
IPR000308	14-3-3 protein		3	7	3.08	1	0	1	4	5	4	3	3
IPR011008	Dimeric alpha-beta barrel		3	6	2.64	5	3	3	3	3	3	3	6
IPR022643	Orn/DAP/Arg decarboxylase 2, C-terminal		3	6	2.64	4	5	3	3	3	3	3	3
IPR009006	Alanine racemase/group IV decarboxylase, C-terminal		3	6	2.64	7	5	3	3	3	3	3	3
IPR000352	Peptide chain release factor class I		3	6	2.64	3	2	2	3	3	3	3	3
IPR044893	RNA polymerase Rpb1, clamp domain superfamily		3	6	2.64	3	3	3	2	4	3	3	3
IPR020829	Glyceraldehyde 3-phosphate dehydrogenase, catalytic domain		3	6	2.64	4	3	2	2	2	3	3	3
IPR020831	Glyceraldehyde/Erythrose phosphate dehydrogenase family		3	6	2.64	4	3	2	2	2	3	3	3
IPR020828	Glyceraldehyde 3-phosphate dehydrogenase, NAD(P) binding domain		3	6	2.64	4	3	2	2	2	3	3	3
IPR007641	RNA polymerase Rpb2, domain 7		3	5	2.2	3	2	2	3	3	4	4	4
IPR019479	Peroxiredoxin, C-terminal		3	5	2.2	9	2	3	3	3	3	4	3
IPR042102	RNA polymerase Rpb1, domain 3 superfamily		3	5	2.2	3	3	2	2	4	3	3	3
IPR007066	RNA polymerase Rpb1, domain 3		3	5	2.2	3	3	2	2	4	3	3	3
IPR045867	DNA-directed RNA polymerase, subunit beta-prime		3	5	2.2	3	3	3	2	4	3	3	3
IPR000722	RNA polymerase, alpha subunit		3	5	2.2	3	3	2	2	4	3	3	3
IPR007083	RNA polymerase Rpb1, domain 4		3	5	2.2	3	3	2	2	4	3	3	3
IPR038120	RNA polymerase Rpb1, funnel domain superfamily		3	5	2.2	3	3	2	2	4	3	3	3
IPR007081	RNA polymerase Rpb1, domain 5		3	5	2.2	3	3	2	2	4	3	3	3
IPR006592	RNA polymerase, N-terminal		3	5	2.2	3	3	2	2	4	3	3	3
IPR004130	GPN-loop GTPase		3	5	2.2	3	4	4	3	4	3	3	3
IPR013748	Replication factor C, C-terminal		3	5	2.2	5	3	3	4	4	2	3	3
IPR007861	DNA mismatch repair protein MutS, clamp		3	5	2.2	3	1	1	3	2	3	3	3
IPR045113	RNA polymerase subunit Rpb7-like		3	5	2.2	3	3	2	4	3	2	2	3
IPR007194	Transport protein particle (TRAPP) component		3	5	2.2	3	3	3	2	3	2	3	2
IPR024096	NO signalling/Golgi transport ligand-binding domain superfamily		3	5	2.2	3	3	3	2	3	2	3	2
IPR006555	ATP-dependent helicase, C-terminal		3	5	2.2	4	4	2	3	4	2	3	3
IPR012164	DNA-directed RNA polymerase subunit/transcription factor S		3	5	2.2	3	3	3	2	3	3	3	3
IPR013029	YchF, C-terminal domain		3	5	2.2	2	2	2	3	4	4	3	3
IPR007214	YbaK/aminoacyl-tRNA synthetase-associated domain		3	5	2.2	2	5	3	3	3	3	4	4
IPR036754	YbaK/aminoacyl-tRNA synthetase-associated domain superfamily		3	5	2.2	3	5	3	3	3	3	4	4
IPR000243	Peptidase T1A, proteasome beta-subunit		3	4	1.76	3	4	3	3	3	2	3	3
IPR012990	Sec23/Sec24 beta-sandwich		3	4	1.76	4	4	3	3	3	2	2	4
IPR007080	RNA polymerase Rpb1, domain 1		3	4	1.76	3	3	3	2	4	3	3	3
IPR006133	DNA-directed DNA polymerase, family B, exonuclease domain		3	4	1.76	4	2	3	2	3	4	3	3
IPR000687	RIO kinase		3	4	1.76	4	2	3	4	4	3	3	3
IPR003891	Initiation factor eIF-4 gamma, MA3		3	4	1.76	4	4	3	2	3	4	2	3
IPR016055	Alpha-D-phosphohexomutase, alpha/beta/alpha I/II/III		3	4	1.76	4	2	1	3	3	2	3	3
IPR005844	Alpha-D-phosphohexomutase, alpha/beta/alpha domain I		3	4	1.76	4	2	1	3	3	2	3	3
IPR036898	RNA polymerase Rpb7-like, N-terminal domain superfamily		3	4	1.76	3	3	2	4	3	2	2	3
IPR036625	E3-binding domain superfamily		3	4	1.76	3	3	2	3	3	3	3	2
IPR004167	Peripheral subunit-binding domain		3	4	1.76	3	3	2	3	3	3	3	2
IPR042063	Ubiquitin-activating enzyme E1, SCCH domain		3	4	1.76	1	4	5	3	3	1	2	3
IPR023192	TGS-like domain superfamily		3	4	1.76	2	2	2	3	4	4	3	3
IPR007645	RNA polymerase Rpb2, domain 3		3	3	1.32	3	3	2	3	3	4	4	4
IPR007644	RNA polymerase, beta subunit, protrusion		3	3	1.32	3	3	2	3	3	4	4	4
IPR037034	RNA polymerase Rpb2, domain 2 superfamily		3	3	1.32	2	3	3	3	3	4	4	4
IPR007642	RNA polymerase Rpb2, domain 2		3	3	1.32	3	3	3	3	3	4	4	4
IPR006639	Presenilin/signal peptide peptidase		3	3	1.32	3	4	2	3	3	3	4	4
IPR032284	ATP-dependent DNA helicase RecQ, zinc-binding domain		3	3	1.32	3	3	3	3	2	2	4	3
IPR008183	Aldose 1-/Glucose-6-phosphate 1-epimerase		3	3	1.32	3	2	2	3	3	3	3	3
IPR036900	Alpha-D-phosphohexomutase, C-terminal domain superfamily		3	3	1.32	4	2	1	3	3	2	3	3
IPR007148	Small-subunit processome, Utp12		3	3	1.32	3	2	2	3	3	4	5	6
IPR007185	DNA polymerase alpha/delta/epsilon, subunit B		3	3	1.32	3	2	2	4	4	2	3	4
IPR004686	Tricarboxylate/iron carrier		3	3	1.32	2	2	2	4	4	3	3	3
IPR023366	ATP synthase subunit alpha, N-terminal domain-like superfamily		3	2	0.88	2	1	2	3	3	3	3	3
IPR036121	ATPase, F1/V1/A1 complex, alpha/beta subunit, N-terminal domain superfamily		3	1	0.44	1	1	1	3	3	3	3	3
IPR006603	PQ-loop repeat		3	1	0.44	3	5	1	3	3	3	3	3
IPR014020	Tensin phosphatase, C2 domain		3	10	4.4	2	3	3	5	5	4	3	5
IPR004854	Ubiquitin fusion degradation protein Ufd1-like		3	8	3.52	2	3	2	5	4	3	4	4
IPR004179	Sec63 domain		3	7	3.08	3	2	4	7	4	4	3	3
IPR004859	Xrn1, N-terminal		3	6	2.64	3	2	0	4	4	3	4	4
IPR002877	Ribosomal RNA methyltransferase, FtsJ domain		3	5	2.2	5	4	3	4	3	2	3	4
IPR001950	SUI1 domain		3	5	2.2	4	2	3	5	5	2	2	4
IPR004095	TGS		3	5	2.2	4	4	3	4	4	2	3	3
IPR004589	DNA helicase, ATP-dependent, RecQ type		3	4	1.76	4	2	3	4	4	2	5	3
IPR022052	Histone-binding protein RBBP4, N-terminal		3	4	1.76	2	3	3	5	5	3	4	5
IPR014724	RNA polymerase Rpb2, OB-fold		3	3	1.32	3	4	2	3	3	4	4	4
IPR027266	GTP-binding protein TrmE/Aminomethyltransferase GcvT, domain 1		3	3	1.32	3	3	4	3	4	4	2	4
IPR020575	Heat shock protein Hsp90, N-terminal		3	3	1.32	4	3	3	3	5	3	4	4
IPR014752	Arrestin-like, C-terminal		3	3	1.32	1	3	5	4	4	3	3	4
IPR018957	Zinc finger, C3HC4 RING-type		3	18	7.92	6	2	4	5	7	3	4	2
IPR003316	E2F/DP family, winged-helix DNA-binding domain		3	8	3.52	6	4	6	3	4	4	4	4
IPR027073	5'-3' exoribonuclease		3	7	3.08	4	4	0	4	4	4	4	4
IPR015712	DNA-directed RNA polymerase, subunit 2		3	6	2.64	6	5	3	3	3	4	4	4
IPR002312	Aspartyl/Asparaginyl-tRNA synthetase, class IIb		3	6	2.64	4	5	3	4	4	4	4	4
IPR003890	MIF4G-like, type 3		3	6	2.64	5	5	2	4	4	6	4	4
IPR038973	DNA mismatch repair protein MutL/Mlh/Pms-like		3	6	2.64	5	8	6	3	3	3	4	4
IPR004821	Cytidyltransferase-like domain		3	6	2.64	4	5	3	4	4	3	3	4
IPR037033	DNA-directed RNA polymerase, subunit 2, hybrid-binding domain superfamily		3	5	2.2	4	5	2	3	3	4	4	4
IPR007120	DNA-directed RNA polymerase, subunit 2, hybrid-binding domain		3	5	2.2	4	4	2	3	3	4	4	4
IPR006569	CID domain		3	5	2.2	5	3	4	5	4	3	4	5
IPR036877	SUI1 domain superfamily		3	5	2.2	4	2	4	5	5	2	2	4
IPR011035	Large ribosomal subunit protein bL25/Gln-tRNA synthetase, anti-codon-binding domain superfamily		3	4	1.76	4	4	2	5	5	3	4	4
IPR020056	Large ribosomal subunit protein bL25/Gln-tRNA synthetase, N-terminal		3	4	1.76	4	4	2	5	5	3	4	4
IPR020058	Glutamyl/glutaminyl-tRNA synthetase, class Ib, catalytic domain		3	4	1.76	4	5	4	4	6	3	4	4
IPR006900	Sec23/Sec24, helical domain		3	4	1.76	4	5	3	5	5	3	3	4
IPR006171	TOPRIM domain		3	4	1.76	3	4	2	4	4	5	6	4
IPR029149	Creatinase/Aminopeptidase P/Spt16, N-terminal		3	4	1.76	4	3	4	4	6	4	4	4
IPR018846	Cleavage/polyadenylation specificity factor, A subunit, N-terminal		3	4	1.76	3	2	1	9	14	4	4	5
IPR013598	Exportin-1/Importin-beta-like		3	3	1.32	4	4	4	5	5	3	5	4
IPR028098	Glycosyltransferase subfamily 4-like, N-terminal domain		3	2	0.88	6	3	5	4	4	3	4	4
IPR000620	EamA domain		3	2	0.88	4	4	4	2	2	3	4	5
IPR010979	Small ribosomal subunit protein uS13-like, H2TH		3	1	0.44	2	1	1	5	5	3	5	5
IPR009019	K homology domain superfamily, prokaryotic type		3	1	0.44	2	2	1	6	6	5	5	3
IPR001557	L-lactate/malate dehydrogenase		3	1	0.44	2	3	1	5	5	4	4	5
IPR002618	UDPGP family		3	20	8.8	4	2	2	5	5	5	2	7
IPR034904	Fe-S cluster assembly domain superfamily		3	6	2.64	5	4	4	5	5	3	5	4
IPR036175	Sec23/Sec24 helical domain superfamily		3	5	2.2	5	5	3	5	5	3	3	4
IPR036180	Gelsolin-like domain superfamily		3	5	2.2	6	4	4	6	5	3	3	6
IPR001100	Pyridine nucleotide-disulphide oxidoreductase, class I		3	5	2.2	3	2	0	5	4	5	5	5
IPR012947	Threonyl/alanyl tRNA synthetase, SAD		3	4	1.76	7	3	5	3	3	5	4	5
IPR006895	Zinc finger, Sec23/Sec24-type		3	4	1.76	3	4	2	5	6	3	5	8
IPR019309	WASH complex subunit 3		3	3	1.32	3	5	4	4	7	5	4	5
IPR002379	V-ATPase proteolipid subunit C-like domain		3	2	0.88	2	1	2	6	6	4	5	6
IPR035921	F/V-ATP synthase subunit C superfamily		3	2	0.88	2	1	2	6	6	4	5	6
IPR036736	ACP-like superfamily		3	16	7.04	4	4	3	5	5	5	6	5
IPR035999	Sec7 domain superfamily		3	11	4.84	5	3	3	5	5	5	4	5
IPR000904	Sec7 domain		3	11	4.84	5	3	3	5	5	5	4	5
IPR023394	Sec7, C-terminal domain superfamily		3	11	4.84	5	3	3	5	5	5	4	5
IPR036676	PurM-like, C-terminal domain superfamily		3	10	4.4	4	5	2	22	36	5	5	5
IPR026854	Vacuolar protein sorting-associated protein 13-like, N-terminal domain		3	9	3.96	5	3	4	8	8	4	5	7
IPR010918	PurM-like, C-terminal domain		3	9	3.96	4	5	2	16	25	5	5	5
IPR036921	PurM-like, N-terminal domain superfamily		3	9	3.96	4	5	2	18	23	5	5	5
IPR004871	Cleavage/polyadenylation specificity factor, A subunit, C-terminal		3	7	3.08	4	5	3	8	10	5	6	5
IPR038375	Protein arginine methyltransferase NDUFAF7 superfamily		3	4	1.76	5	6	5	5	5	4	5	4
IPR013750	GHMP kinase, C-terminal domain		3	4	1.76	5	4	3	7	9	5	5	7
IPR044880	NCX, central ion-binding domain superfamily		3	4	1.76	6	6	6	5	5	5	5	5
IPR039542	Endoplasmic reticulum vesicle transporter, N-terminal		3	4	1.76	4	5	2	8	6	6	5	5
IPR005946	Ribose-phosphate pyrophosphokinase		3	4	1.76	3	4	5	6	6	5	5	5
IPR024704	Structural maintenance of chromosomes protein		3	4	1.76	4	0	1	5	5	6	5	5
IPR001236	Lactate/malate dehydrogenase, N-terminal		3	4	1.76	2	3	2	5	5	5	5	5
IPR022383	Lactate/malate dehydrogenase, C-terminal		3	4	1.76	2	3	2	5	5	5	5	5
IPR015955	Lactate dehydrogenase/glycoside hydrolase, family 4, C-terminal		3	4	1.76	2	3	2	5	5	5	5	5
IPR001055	Adrenodoxin		3	3	1.32	3	3	2	4	7	6	6	8
IPR018492	Ribosomal protein eL8/Nhp2 family		3	3	1.32	3	4	5	5	5	8	8	8
IPR026591	Sirtuin, catalytic core small domain superfamily		3	7	3.08	6	8	5	7	6	2	3	5
IPR000409	BEACH domain		3	15	6.6	8	6	5	6	6	6	6	6
IPR036372	BEACH domain superfamily		3	15	6.6	8	6	5	6	6	6	6	6
IPR006447	Myb domain, plants		3	12	5.28	11	6	6	4	6	4	6	8
IPR000326	Phosphatidic acid phosphatase type 2/haloperoxidase		3	9	3.96	8	7	6	5	5	5	6	7
IPR045888	Endoplasmic reticulum vesicle transporter		3	5	2.2	4	6	4	8	7	6	6	7
IPR012936	Endoplasmic reticulum vesicle transporter, C-terminal		3	5	2.2	4	5	3	8	7	6	6	7
IPR035587	DUS-like, FMN-binding domain		3	4	1.76	5	5	4	7	7	6	7	6
IPR007052	CS domain		3	12	5.28	4	6	6	7	8	6	7	7
IPR043127	Sec1-like, domain 3a		3	10	4.4	5	5	4	7	7	6	7	8
IPR036938	Phosphatidic acid phosphatase type 2/haloperoxidase superfamily		3	10	4.4	7	8	7	5	6	6	6	7
IPR006638	Elp3/MiaA/NifB-like, radical SAM core domain		3	9	3.96	5	5	6	8	8	7	6	7
IPR000261	EH domain		3	8	3.52	4	5	3	8	5	8	10	9
IPR016040	NAD(P)-binding domain		3	6	2.64	3	2	2	7	8	9	6	7
IPR004046	Glutathione S-transferase, C-terminal		3	25	11	11	7	7	7	7	5	5	12
IPR036443	Zinc finger, RanBP2-type superfamily		3	18	7.92	10	8	7	4	6	6	7	7
IPR026739	AP complex subunit beta		3	6	2.64	3	4	4	8	9	7	7	7
IPR008210	Phosphoenolpyruvate carboxykinase, N-terminal		3	5	2.2	4	3	1	9	10	7	7	9
IPR009068	uS15/NS1, RNA-binding domain superfamily		3	3	1.32	5	4	4	7	7	7	7	8
IPR004100	ATPase, F1/V1/A1 complex, alpha/beta subunit, N-terminal domain		3	2	0.88	2	2	2	7	7	7	7	7
IPR044713	DnaJ homolog subfamily A member 1/2-like		3	7	3.08	7	11	9	8	8	7	7	8
IPR034733	Acetyl-coenzyme A carboxylase carboxyl transferase subunit beta		3	8	3.52	4	2	3	11	10	9	9	10
IPR045075	Pre-mRNA-splicing factor Syf1-like		3	7	3.08	3	6	5	12	13	9	9	12
IPR006115	6-phosphogluconate dehydrogenase, NADP-binding		3	3	1.32	2	3	1	10	11	9	9	9
IPR001357	BRCT domain		3	24	10.56	13	8	9	10	8	10	9	14
IPR026847	Vacuolar protein sorting-associated protein 13		3	14	6.16	8	10	12	10	13	9	8	8
IPR036598	GOLD domain superfamily		3	7	3.08	7	7	7	12	12	10	11	9
IPR036227	Large ribosomal subunit protein uL15/eL18 superfamily		3	4	1.76	3	2	3	11	11	9	10	12
IPR021131	Large ribosomal subunit protein uL15/eL18		3	4	1.76	3	2	3	11	11	9	10	12
IPR000306	FYVE zinc finger		3	29	12.76	11	9	10	14	13	10	11	9
IPR005069	Nucleotide-diphospho-sugar transferase		3	19	8.36	11	4	6	15	20	13	9	16
IPR002942	RNA-binding S4 domain		3	8	3.52	7	5	5	12	15	13	14	15
IPR005824	KOW		3	7	3.08	4	2	3	13	13	16	16	17
IPR037282	F-actin-capping protein subunit alpha/beta	Actin	2	3	1.32	2	2	1	2	2	2	3	2
IPR042276	F-actin-capping protein subunit alpha/beta, domain 2	Actin	2	1	0.44	2	2	1	2	2	2	3	2
IPR005294	ATP synthase, F1 complex, alpha subunit	aerobic metabolism	2	0	0	0	0	0	0	0	0	0	0
IPR025980	ATP-sulfurylase PUA-like domain	aerobic metabolism	2	0	0	0	0	0	0	0	0	0	0
IPR013892	Cytochrome c oxidase biogenesis protein Cmc1-like	aerobic metabolism	2	0	0	0	0	0	0	0	0	0	0
IPR036549	Cytochrome c oxidase, subunit VIb superfamily	aerobic metabolism	2	0	0	0	0	0	0	0	0	0	0
IPR036909	Cytochrome c-like domain superfamily	aerobic metabolism	2	0	0	0	0	0	0	0	0	0	0
IPR048280	Cytochrome oxidase c subunit VIb-like	aerobic metabolism	2	0	0	0	0	0	0	0	0	0	0
IPR039800	Calcium uptake protein 1/2/3	Calcium	2	0	0	0	0	0	0	0	0	0	0
IPR001881	EGF-like calcium-binding domain	Calcium	2	2	0.88	0	0	0	0	0	0	0	0
IPR049883	NOTCH1 EGF-like calcium-binding domain	Calcium	2	1	0.44	0	0	0	0	0	0	0	0
IPR004481	Sodium/potassium/calcium exchanger	Calcium	2	0	0	4	3	4	2	2	2	2	2
IPR015449	Potassium channel, calcium-activated, SK	Calcium activated channel	2	0	0	0	0	0	0	0	0	0	0
IPR039586	Cilia- and flagella-associated protein 46	cilia/flagella	2	2	0.88	0	0	0	0	0	0	0	0
IPR039857	Intraflagellar transport protein 122/121 homolog	cilia/flagella	2	3	1.32	0	0	0	0	0	0	0	0
IPR010291	Ion channel regulatory protein, UNC-93	Ion channel regulator	2	8	3.52	9	7	10	5	6	6	6	6
IPR047149	Kinesin-like protein KIF11-like	Kinesin	2	11	4.84	2	1	1	0	0	0	0	0
IPR040445	Potassium channel, inwardly rectifying, transmembrane domain	Potassium channel	2	0	0	1	1	1	0	0	0	0	1
IPR013518	Potassium channel, inwardly rectifying, Kir, cytoplasmic	Potassium channel	2	0	0	1	1	1	2	2	2	2	2
IPR041647	Inward rectifier potassium channel, C-terminal	Potassium channel	2	0	0	1	1	1	2	2	2	2	2
IPR016449	Potassium channel, inwardly rectifying, Kir	Potassium channel	2	0	0	1	1	1	2	2	2	2	2
IPR002452	Alpha tubulin	tubulin	2	9	3.96	1	1	1	1	1	1	1	1
IPR030564	Myotubularin family	tubulin	2	8	3.52	1	1	0	1	1	1	1	1
IPR010569	Myotubularin-like, phosphatase domain	tubulin	2	8	3.52	1	1	0	1	1	1	1	1
IPR042241	Gamma-tubulin complex component, C-terminal domain superfamily	tubulin	2	6	2.64	4	1	3	3	2	1	2	2
IPR040457	Gamma tubulin complex component, C-terminal	tubulin	2	6	2.64	3	1	3	3	2	1	2	2
IPR007259	Gamma-tubulin complex component protein	tubulin	2	6	2.64	3	3	2	3	1	1	2	2
IPR041470	Gamma tubulin complex component protein, N-terminal	tubulin	2	4	1.76	3	3	2	3	1	1	2	2
IPR022683	Peptidase C2, calpain, domain III		2	12	5.28	0	1	1	0	0	1	1	0
IPR013130	Ferric reductase transmembrane component-like domain		2	6	2.64	1	0	0	0	0	1	1	1
IPR005952	Phosphoglycerate mutase 1		2	4	1.76	2	2	2	0	0	0	0	1
IPR006175	YjgF/YER057c/UK114 family		2	4	1.76	1	1	0	0	0	1	1	0
IPR019165	Peptidase M76, ATP23		2	2	0.88	1	0	0	1	1	0	0	1
IPR011048	Cytochrome cd1-nitrite reductase-like, haem d1 domain superfamily		2	0	0	0	1	2	0	0	2	2	0
IPR002656	Acyltransferase 3 domain		2	6	2.64	0	0	0	0	0	0	0	0
IPR044638	Aldehyde dehydrogenase family 7 member A1-like		2	1	0.44	0	0	0	0	0	0	0	0
IPR039188	ATPase family AAA domain-containing protein 3		2	1	0.44	0	0	0	0	0	0	0	0
IPR021911	ATPase family AAA domain-containing protein 3, N-terminal		2	1	0.44	0	0	0	0	0	0	0	0
IPR028784	Bardet-Biedl syndrome 1 protein		2	1	0.44	0	0	0	0	0	0	0	0
IPR032728	Bardet-Biedl syndrome 1, N-terminal		2	1	0.44	0	0	0	0	0	0	0	0
IPR023379	BART domain		2	7	3.08	0	0	0	0	0	0	0	0
IPR042541	BART domain superfamily		2	7	3.08	0	0	0	0	0	0	0	0
IPR049492	BD-FAE-like domain		2	4	1.76	0	0	0	0	0	0	0	0
IPR003117	cAMP-dependent protein kinase regulatory subunit, dimerization-anchoring domain		2	1	0.44	0	0	0	0	0	0	0	0
IPR022682	Peptidase C2, calpain, large subunit, domain III		2	11	4.84	0	1	0	0	0	0	0	0
IPR032677	GTP cyclohydrolase II		2	7	3.08	2	2	2	0	0	0	0	0
IPR036144	GTP cyclohydrolase II superfamily		2	7	3.08	2	2	2	0	0	0	0	0
IPR036056	Fibrinogen-like, C-terminal		2	5	2.2	2	0	0	0	1	0	0	1
IPR020849	Small GTPase, Ras-type		2	5	2.2	1	1	1	0	0	0	0	0
IPR007858	Dpy-30 motif		2	5	2.2	0	0	1	0	0	0	0	0
IPR041489	PDZ domain 6		2	4	1.76	1	0	0	0	0	0	0	0
IPR036055	LDL receptor-like superfamily		2	4	1.76	0	0	0	1	1	0	0	2
IPR016487	Sm-like protein Lsm6/SmF		2	3	1.32	0	0	0	1	0	1	1	0
IPR001374	R3H domain		2	3	1.32	0	0	0	1	1	0	0	0
IPR020635	Tyrosine-protein kinase, catalytic domain		2	3	1.32	0	1	1	1	0	0	0	0
IPR004621	Eukaryotic-type methylenetetrahydrofolate reductase		2	3	1.32	0	0	1	0	0	0	0	0
IPR009069	Cysteine alpha-hairpin motif superfamily		2	2	0.88	1	1	3	0	0	0	0	0
IPR039959	Fimbrin/Plastin		2	2	0.88	1	1	1	0	0	0	0	0
IPR045101	PTEN, phosphatase domain		2	2	0.88	1	1	1	0	0	0	0	0
IPR002652	Importin-alpha, importin-beta-binding domain		2	2	0.88	1	0	0	0	0	0	0	0
IPR000980	SH2 domain		2	2	0.88	1	0	0	0	0	0	1	1
IPR008893	WGR domain		2	2	0.88	1	1	1	0	0	0	0	0
IPR001828	Receptor, ligand binding region		2	2	0.88	0	0	0	0	0	1	1	1
IPR009688	Protein FAM210A/B-like domain		2	2	0.88	0	1	0	0	1	0	0	0
IPR022343	GCR1-cAMP receptor		2	2	0.88	0	0	0	0	1	0	0	0
IPR031314	Deoxynucleoside kinase domain		2	2	0.88	0	0	0	0	0	0	0	0
IPR024671	Autophagy-related protein 22-like		2	1	0.44	4	5	3	0	0	0	0	0
IPR017943	Bactericidal permeability-increasing protein, alpha/beta domain superfamily		2	1	0.44	1	1	1	0	0	0	0	0
IPR044641	Sm-like protein Lsm7/SmG		2	1	0.44	2	0	0	0	0	1	0	0
IPR006942	TH1 protein		2	1	0.44	1	0	1	0	0	0	0	0
IPR004491	Heat shock protein HslU		2	1	0.44	1	1	1	0	0	0	0	0
IPR038607	PhoD-like superfamily		2	1	0.44	1	1	1	0	0	0	0	0
IPR047182	rRNA methyltransferase 1, mitochondrial		2	1	0.44	1	1	1	0	0	0	0	0
IPR031717	Multifunctional 2-oxoglutarate metabolism enzyme, C-terminal		2	1	0.44	1	1	0	0	0	0	0	0
IPR042179	Multifunctional 2-oxoglutarate metabolism enzyme, C-terminal domain superfamily		2	1	0.44	1	1	0	0	0	0	0	0
IPR011603	2-oxoglutarate dehydrogenase E1 component		2	1	0.44	1	2	0	0	0	0	0	0
IPR035680	Hydroxyacylglutathione hydrolase, MBL domain		2	1	0.44	0	0	0	2	0	1	1	0
IPR001884	Translation elongation factor IF5A-like		2	1	0.44	0	1	1	0	0	0	0	0
IPR020189	Translation elongation factor, IF5A C-terminal		2	1	0.44	0	1	1	0	0	0	0	0
IPR048670	Translation initiation factor 5A-like, N-terminal		2	1	0.44	0	1	1	0	0	0	0	0
IPR024991	Anaphase-promoting complex subunit 11, RING-H2 finger		2	1	0.44	0	0	1	0	0	0	0	0
IPR022312	DNA polymerase family X		2	1	0.44	0	0	0	0	0	0	0	0
IPR025254	Domain of unknown function DUF4201		2	2	0.88	0	0	0	0	0	0	0	0
IPR008972	Cupredoxin		2	0	0	1	1	1	0	0	0	0	0
IPR033403	Domain of unknown function DUF5110		2	0	0	4	3	3	0	0	0	0	0
IPR025202	Phospholipase D-like domain		2	0	0	1	0	0	0	0	0	0	0
IPR039650	H(2):CoB-CoM heterodisulfide,ferredoxin reductase subunit A-like		2	0	0	1	0	0	0	0	0	0	0
IPR035396	Alpha-L-rhamnosidase, six-hairpin glycosidase domain		2	0	0	2	3	0	0	0	0	0	0
IPR044774	Suv3, DEXQ-box helicase domain		2	0	0	1	0	1	0	0	0	0	0
IPR044751	Ion transporter-like, CBS domain		2	0	0	1	0	2	0	0	0	0	0
IPR007841	Uncharacterised protein family UPF0210		2	0	0	1	1	1	0	0	0	0	0
IPR031100	LOG family		2	0	0	0	0	0	0	0	1	0	1
IPR044754	Isw1/2, N-terminal		2	0	0	0	0	0	0	0	1	0	1
IPR004834	Fungal chitin synthase		2	0	0	0	1	0	0	0	0	0	0
IPR039680	Pleckstrin homology domain-containing family B member 1/2		2	0	0	0	0	1	0	0	0	0	0
IPR027278	1-aminocyclopropane-1-carboxylate deaminase/D-cysteine desulfhydrase		2	0	0	0	0	0	0	0	0	0	0
IPR009305	2-hydroxy-palmitic acid dioxygenase Mpo1-like		2	0	0	0	0	0	0	0	0	0	0
IPR002225	3-beta hydroxysteroid dehydrogenase/isomerase		2	0	0	0	0	0	0	0	0	0	0
IPR006108	3-hydroxyacyl-CoA dehydrogenase, C-terminal		2	0	0	0	0	0	0	0	0	0	0
IPR006176	3-hydroxyacyl-CoA dehydrogenase, NAD binding		2	0	0	0	0	0	0	0	0	0	0
IPR005263	4-hydroxy-tetrahydrodipicolinate synthase, DapA		2	0	0	0	0	0	0	0	0	0	0
IPR008334	5'-Nucleotidase, C-terminal		2	0	0	0	0	0	0	0	0	0	0
IPR036907	5'-Nucleotidase, C-terminal domain superfamily		2	0	0	0	0	0	0	0	0	0	0
IPR006179	5'-Nucleotidase/apyrase		2	0	0	0	0	0	0	0	0	0	0
IPR049448	ACAD9/ACADV-like, C-terminal domain		2	0	0	0	0	0	0	0	0	0	0
IPR011904	Acetate-CoA ligase		2	0	0	0	0	0	0	0	0	0	0
IPR041726	Acyl-CoA dehydrogenase family member 10/11, N-terminal		2	0	0	0	0	0	0	0	0	0	0
IPR002655	Acyl-CoA oxidase, C-terminal		2	0	0	0	0	0	0	0	0	0	0
IPR003703	Acyl-CoA thioesterase		2	0	0	0	0	0	0	0	0	0	0
IPR039298	Acyl-coenzyme A thioesterase 13		2	0	0	0	0	0	0	0	0	0	0
IPR034646	ADCK3-like domain		2	0	0	0	0	0	0	0	0	0	0
IPR002113	ADP/ATP carrier protein, eukaryotic type		2	0	0	0	0	0	0	0	0	0	0
IPR036882	Alba-like domain superfamily		2	0	0	0	0	0	0	0	0	0	0
IPR027450	Alpha-ketoglutarate-dependent dioxygenase AlkB-like		2	0	0	0	0	0	0	0	0	0	0
IPR008902	Alpha-L-rhamnosidase, concanavalin-like domain		2	0	0	0	0	0	0	0	0	0	0
IPR010791	AttH domain		2	0	0	0	0	0	0	0	0	0	0
IPR023374	AttH-like domain superfamily		2	0	0	0	0	0	0	0	0	0	0
IPR013737	Bacterial alpha-L-rhamnosidase N-terminal		2	0	0	0	0	0	0	0	0	0	0
IPR014818	Bacteriophage/plasmid primase, P4, C-terminal		2	0	0	0	0	0	0	0	0	0	0
IPR040239	Beta-lactamase HcpB-like		2	0	0	0	0	0	0	0	0	0	0
IPR002657	Bile acid:sodium symporter/arsenical resistance protein Acr3		2	0	0	0	0	0	0	0	0	0	0
IPR032942	BPI/LBP/Plunc family		2	0	0	0	0	0	0	0	0	0	0
IPR016186	C-type lectin-like/link domain superfamily		2	0	0	0	0	0	0	0	0	0	0
IPR002159	CD36 family		2	0	0	0	0	0	0	0	0	0	0
IPR042240	CHASE domain superfamily		2	0	0	0	0	0	0	0	0	0	0
IPR000997	Cholinesterase		2	0	0	0	0	0	0	0	0	0	0
IPR002020	Citrate synthase		2	0	0	0	0	0	0	0	0	0	0
IPR036969	Citrate synthase superfamily		2	0	0	0	0	0	0	0	0	0	0
IPR016142	Citrate synthase-like, large alpha subdomain		2	0	0	0	0	0	0	0	0	0	0
IPR016143	Citrate synthase-like, small alpha subdomain		2	0	0	0	0	0	0	0	0	0	0
IPR010926	Class I myosin tail homology domain		2	0	0	0	0	0	0	0	0	0	0
IPR002207	Class I peroxidase		2	0	0	0	0	0	0	0	0	0	0
IPR014784	Copper type II, ascorbate-dependent monooxygenase-like, C-terminal		2	0	0	0	0	0	0	0	0	0	0
IPR045266	Copper-dependent monooxygenases, DOMON domain		2	0	0	0	0	0	0	0	0	0	0
IPR002081	Cryptochrome/DNA photolyase class 1		2	0	0	0	0	0	0	0	0	0	0
IPR006236	D-3-phosphoglycerate dehydrogenase		2	0	0	0	0	0	0	0	0	0	0
IPR045626	D-3-phosphoglycerate dehydrogenase, ASB domain		2	0	0	0	0	0	0	0	0	0	0
IPR040165	Delta(24)-sterol reductase		2	0	0	0	0	0	0	0	0	0	0
IPR016174	Di-haem cytochrome, transmembrane		2	0	0	0	0	0	0	0	0	0	0
IPR022663	Dihydrodipicolinate reductase, C-terminal		2	0	0	0	0	0	0	0	0	0	0
IPR003734	Domain of unknown function DUF155		2	0	0	0	0	0	0	0	0	0	0
IPR005018	DOMON domain		2	0	0	0	0	0	0	0	0	0	0
IPR047201	ERI-1-like, DEDDh 3'-5' exonuclease domain		2	0	0	0	0	0	0	0	0	0	0
IPR033294	Erlin1/2		2	0	0	0	0	0	0	0	0	0	0
IPR000801	Esterase-like		2	0	0	0	0	0	0	0	0	0	0
IPR004113	FAD-binding oxidoreductase/transferase, type 4, C-terminal		2	0	0	0	0	0	0	0	0	0	0
IPR016164	FAD-linked oxidase-like, C-terminal		2	0	0	0	0	0	0	0	0	0	0
IPR003965	Fatty acid synthase		2	0	0	0	0	0	0	0	0	0	0
IPR026928	FAX/IsoI-like		2	0	0	0	0	0	0	0	0	0	0
IPR012968	FerIin domain		2	0	0	0	0	0	0	0	0	0	0
IPR037724	Ferlin, fifth C2 domain		2	0	0	0	0	0	0	0	0	0	0
IPR003812	Fido domain		2	0	0	0	0	0	0	0	0	0	0
IPR040198	Fido domain-containing protein		2	0	0	0	0	0	0	0	0	0	0
IPR036597	Fido-like domain superfamily		2	0	0	0	0	0	0	0	0	0	0
IPR044801	Filamin family		2	0	0	0	0	0	0	0	0	0	0
IPR003378	Fringe-like, glycosyltransferase domain		2	0	0	0	0	0	0	0	0	0	0
IPR022340	G protein-coupled receptor GCR1 putative		2	0	0	0	0	0	0	0	0	0	0
IPR011529	Glutamate 5-kinase		2	0	0	0	0	0	0	0	0	0	0
IPR005715	Glutamate 5-kinase/delta-1-pyrroline-5-carboxylate synthase		2	0	0	0	0	0	0	0	0	0	0
IPR041739	Glutamate-5-kinase domain		2	0	0	0	0	0	0	0	0	0	0
IPR001057	Glutamate/acetylglutamate kinase		2	0	0	0	0	0	0	0	0	0	0
IPR049304	Glycine-rich domain		2	0	0	0	0	0	0	0	0	0	0
IPR002252	Glycoside hydrolase family 36		2	0	0	0	0	0	0	0	0	0	0
IPR001661	Glycoside hydrolase, family 37		2	0	0	0	0	0	0	0	0	0	0
IPR031705	Glycosyl hydrolase family 36, C-terminal		2	0	0	0	0	0	0	0	0	0	0
IPR031704	Glycosyl hydrolase family 36, N-terminal		2	0	0	0	0	0	0	0	0	0	0
IPR003342	Glycosyl transferase family 39/83		2	0	0	0	0	0	0	0	0	0	0
IPR027005	Glycosyltransferase 39-like		2	0	0	0	0	0	0	0	0	0	0
IPR003191	Guanylate-binding protein/Atlastin, C-terminal		2	0	0	0	0	0	0	0	0	0	0
IPR025832	GxGYxYP putative glycoside hydrolase, C-terminal		2	0	0	0	0	0	0	0	0	0	0
IPR038410	GxGYxYP putative glycoside hydrolase, C-terminal domain superfamily		2	0	0	0	0	0	0	0	0	0	0
IPR002016	Haem peroxidase		2	0	0	0	0	0	0	0	0	0	0
IPR006122	Heavy metal-associated domain, copper ion-binding		2	0	0	0	0	0	0	0	0	0	0
IPR044831	Heme-binding peroxidase Ccp1-like		2	0	0	0	0	0	0	0	0	0	0
IPR006062	Histidine biosynthesis protein		2	0	0	0	0	0	0	0	0	0	0
IPR000511	Holocytochrome c/c1 synthase		2	0	0	0	0	0	0	0	0	0	0
IPR008637	HR-like lesion-inducer		2	0	0	0	0	0	0	0	0	0	0
IPR018155	Hyaluronidase		2	0	0	0	0	0	0	0	0	0	0
IPR039477	ILEI/PANDER domain		2	0	0	0	0	0	0	0	0	0	0
IPR019412	Inclusion body clearance protein Iml2/Tetratricopeptide repeat protein 39		2	0	0	0	0	0	0	0	0	0	0
IPR023186	Inosine/uridine-preferring nucleoside hydrolase		2	0	0	0	0	0	0	0	0	0	0
IPR003349	JmjN domain		2	0	0	0	0	0	0	0	0	0	0
IPR001124	Lipid-binding serum glycoprotein, C-terminal		2	0	0	0	0	0	0	0	0	0	0
IPR017942	Lipid-binding serum glycoprotein, N-terminal		2	0	0	0	0	0	0	0	0	0	0
IPR000566	Lipocalin/cytosolic fatty-acid binding domain		2	0	0	0	0	0	0	0	0	0	0
IPR010640	Low temperature requirement A		2	0	0	0	0	0	0	0	0	0	0
IPR019330	LRP chaperone MESD		2	0	0	0	0	0	0	0	0	0	0
IPR045252	Lysophosphatidylcholine acyltransferase LPCAT1-like		2	0	0	0	0	0	0	0	0	0	0
IPR023346	Lysozyme-like domain superfamily		2	0	0	0	0	0	0	0	0	0	0
IPR040072	Methyltransferase (Class A)		2	0	0	0	0	0	0	0	0	0	0
IPR000940	Methyltransferase, NNMT/PNMT/TEMT		2	0	0	0	0	0	0	0	0	0	0
IPR022192	Mitochondrial degradasome RNA helicase subunit, C-terminal domain		2	0	0	0	0	0	0	0	0	0	0
IPR036425	MoaB/Mog-like domain superfamily		2	0	0	0	0	0	0	0	0	0	0
IPR039031	Mucolipin		2	0	0	0	0	0	0	0	0	0	0
IPR005025	NADPH-dependent FMN reductase-like		2	0	0	0	0	0	0	0	0	0	0
IPR038050	Neuronal acetylcholine receptor		2	0	0	0	0	0	0	0	0	0	0
IPR026088	Niban-like		2	0	0	0	0	0	0	0	0	0	0
IPR011322	Nitrogen regulatory PII-like, alpha/beta		2	0	0	0	0	0	0	0	0	0	0
IPR015867	Nitrogen regulatory protein PII/ATP phosphoribosyltransferase, C-terminal		2	0	0	0	0	0	0	0	0	0	0
IPR043454	NPH3/RPT2-like family		2	0	0	0	0	0	0	0	0	0	0
IPR006534	P-type ATPase, subfamily IIIA		2	0	0	0	0	0	0	0	0	0	0
IPR001610	PAC motif		2	0	0	0	0	0	0	0	0	0	0
IPR004155	PBS lyase HEAT-like repeat		2	0	0	0	0	0	0	0	0	0	0
IPR043147	Penicillin amidase type, A-knob		2	0	0	0	0	0	0	0	0	0	0
IPR023343	Penicillin amidase type, domain 1		2	0	0	0	0	0	0	0	0	0	0
IPR043146	Penicillin amidase type, N-terminal domain, B-knob		2	0	0	0	0	0	0	0	0	0	0
IPR002692	Penicillin/GL-7-ACA/AHL/aculeacin-A acylase		2	0	0	0	0	0	0	0	0	0	0
IPR036440	Peptidase C15, pyroglutamyl peptidase I-like superfamily		2	0	0	0	0	0	0	0	0	0	0
IPR011697	Peptidase C26		2	0	0	0	0	0	0	0	0	0	0
IPR015527	Peptidase C26, gamma-glutamyl hydrolase		2	0	0	0	0	0	0	0	0	0	0
IPR000250	Peptidase G1		2	0	0	0	0	0	0	0	0	0	0
IPR038656	Peptidase G1 superfamily		2	0	0	0	0	0	0	0	0	0	0
IPR008752	Peptidase M11, gametolysin		2	0	0	0	0	0	0	0	0	0	0
IPR002410	Peptidase S33		2	0	0	0	0	0	0	0	0	0	0
IPR028427	Peptide methionine sulfoxide reductase MsrB		2	0	0	0	0	0	0	0	0	0	0
IPR029151	Periplasmic sensor-like domain superfamily		2	0	0	0	0	0	0	0	0	0	0
IPR037944	Peroxiredoxin-5-like		2	0	0	0	0	0	0	0	0	0	0
IPR044528	Persulfide dioxygenase-like, MBL-fold metallo-hydrolase domain		2	0	0	0	0	0	0	0	0	0	0
IPR037053	Phage tail collar domain superfamily		2	0	0	0	0	0	0	0	0	0	0
IPR008977	PHM/PNGase F domain superfamily		2	0	0	0	0	0	0	0	0	0	0
IPR018711	Phosphodiester glycosidase		2	0	0	0	0	0	0	0	0	0	0
IPR012093	Pirin		2	0	0	0	0	0	0	0	0	0	0
IPR003829	Pirin, N-terminal domain		2	0	0	0	0	0	0	0	0	0	0
IPR022409	PKD/Chitinase domain		2	0	0	0	0	0	0	0	0	0	0
IPR044566	Polyamine transporter RMV1-like		2	0	0	0	0	0	0	0	0	0	0
IPR003968	Potassium channel, voltage dependent, Kv		2	0	0	0	0	0	0	0	0	0	0
IPR005944	Proline iminopeptidase		2	0	0	0	0	0	0	0	0	0	0
IPR002015	Proteasome/cyclosome repeat		2	0	0	0	0	0	0	0	0	0	0
IPR042480	Protein dispatched homolog 3		2	0	0	0	0	0	0	0	0	0	0
IPR013618	Protein O-mannosyl-transferase TMTC, DUF1736		2	0	0	0	0	0	0	0	0	0	0
IPR032421	Protein O-mannosyl-transferase, C-terminal four TM domain		2	0	0	0	0	0	0	0	0	0	0
IPR021259	Protein of unknown function DUF2817		2	0	0	0	0	0	0	0	0	0	0
IPR007402	Protein of unknown function DUF455		2	0	0	0	0	0	0	0	0	0	0
IPR046513	Protein of unknown function DUF6691		2	0	0	0	0	0	0	0	0	0	0
IPR008547	Protein of unknown function DUF829, TMEM53		2	0	0	0	0	0	0	0	0	0	0
IPR001533	Pterin 4 alpha carbinolamine dehydratase		2	0	0	0	0	0	0	0	0	0	0
IPR036428	Pterin 4 alpha carbinolamine dehydratase superfamily		2	0	0	0	0	0	0	0	0	0	0
IPR039331	Purple acid phosphatase-like		2	0	0	0	0	0	0	0	0	0	0
IPR044592	Putative E3 ubiquitin-protein ligase RING1a/b		2	0	0	0	0	0	0	0	0	0	0
IPR013740	Redoxin		2	0	0	0	0	0	0	0	0	0	0
IPR003450	Replication origin-binding protein		2	0	0	0	0	0	0	0	0	0	0
IPR004383	Ribosomal RNA large subunit methyltransferase RlmN/Cfr		2	0	0	0	0	0	0	0	0	0	0
IPR003033	SCP2 sterol-binding domain		2	0	0	0	0	0	0	0	0	0	0
IPR036527	SCP2 sterol-binding domain superfamily		2	0	0	0	0	0	0	0	0	0	0
IPR009686	Senescence/spartin-associated, C-terminal		2	0	0	0	0	0	0	0	0	0	0
IPR049680	Solute carrier family 49-like		2	0	0	0	0	0	0	0	0	0	0
IPR045036	Spartin-like		2	0	0	0	0	0	0	0	0	0	0
IPR001171	Sterol biosynthesis ERG24/DHCR-like		2	0	0	0	0	0	0	0	0	0	0
IPR002650	Sulphate adenylyltransferase		2	0	0	0	0	0	0	0	0	0	0
IPR024951	Sulphate adenylyltransferase catalytic domain		2	0	0	0	0	0	0	0	0	0	0
IPR041082	Suv3, C-terminal domain 1		2	0	0	0	0	0	0	0	0	0	0
IPR001267	Thymidine kinase		2	0	0	0	0	0	0	0	0	0	0
IPR005349	TMEM14 family		2	0	0	0	0	0	0	0	0	0	0
IPR044890	TMEM14 superfamily		2	0	0	0	0	0	0	0	0	0	0
IPR000157	Toll/interleukin-1 receptor homology (TIR) domain		2	0	0	0	0	0	0	0	0	0	0
IPR035897	Toll/interleukin-1 receptor homology (TIR) domain superfamily		2	0	0	0	0	0	0	0	0	0	0
IPR008854	TPMT family		2	0	0	0	0	0	0	0	0	0	0
IPR043992	Transglycosylase SLT domain 3		2	0	0	0	0	0	0	0	0	0	0
IPR040035	Transmembrane protein 180		2	0	0	0	0	0	0	0	0	0	0
IPR021771	Triacylglycerol lipase, N-terminal		2	0	0	0	0	0	0	0	0	0	0
IPR049563	Tricarboxylate transport protein-like		2	0	0	0	0	0	0	0	0	0	0
IPR033671	tRNA (guanosine(18)-2'-O)-methyltransferase		2	0	0	0	0	0	0	0	0	0	0
IPR037217	Tryptophan/Indoleamine 2,3-dioxygenase-like		2	0	0	0	0	0	0	0	0	0	0
IPR038330	TspO/MBR-related superfamily		2	0	0	0	0	0	0	0	0	0	0
IPR003280	Two pore domain potassium channel		2	0	0	0	0	0	0	0	0	0	0
IPR044878	UbiA prenyltransferase superfamily		2	0	0	0	0	0	0	0	0	0	0
IPR011566	Ubiquinone biosynthesis protein Coq7		2	0	0	0	0	0	0	0	0	0	0
IPR011197	Uncharacterised conserved protein UCP012318		2	0	0	0	0	0	0	0	0	0	0
IPR007919	Uncharacterised protein family UPF0220		2	0	0	0	0	0	0	0	0	0	0
IPR006855	Vertebrate-like NAGS Gcn5-related N-acetyltransferase (GNAT) domain		2	0	0	0	0	0	0	0	0	0	0
IPR001846	von Willebrand factor, type D domain		2	0	0	0	0	0	0	0	0	0	0
IPR049809	YehF/YfeS-like, WGR domain		2	0	0	0	0	0	0	0	0	0	0
IPR010488	Zeta toxin domain		2	0	0	0	0	0	0	0	0	0	0
IPR019585	26S proteasome regulatory subunit Rpn7/COP9 signalosome complex subunit 1		2	18	7.92	1	1	1	1	1	1	1	1
IPR002172	Low-density lipoprotein (LDL) receptor class A repeat		2	8	3.52	1	1	1	2	1	0	0	3
IPR013112	FAD-binding 8		2	7	3.08	2	0	1	1	1	0	0	1
IPR006640	SprT-like		2	7	3.08	2	2	2	1	1	1	1	1
IPR015151	Beta-adaptin appendage, C-terminal subdomain		2	7	3.08	2	1	1	1	1	1	1	1
IPR007272	Sulphur transport domain		2	6	2.64	1	1	2	1	1	1	1	1
IPR023198	Phosphoglycolate phosphatase-like, domain 2		2	5	2.2	3	1	1	1	1	0	0	1
IPR037094	Glycoside hydrolase family 38, central domain superfamily		2	5	2.2	5	4	6	1	1	1	1	1
IPR028995	Glycoside hydrolase families 57/38, central domain superfamily		2	5	2.2	5	4	6	1	1	1	1	1
IPR003111	Lon protease, N-terminal domain		2	5	2.2	1	1	1	1	1	1	2	1
IPR001564	Nucleoside diphosphate kinase		2	5	2.2	1	1	1	1	1	1	1	1
IPR037898	NudC family		2	5	2.2	1	2	2	1	2	1	1	1
IPR036078	Spo11/DNA topoisomerase VI subunit A superfamily		2	5	2.2	1	0	1	1	1	1	1	1
IPR034136	Topoisomerase 6 subunit A/Spo11, TOPRIM domain		2	5	2.2	1	0	1	1	1	1	1	1
IPR002815	Spo11/DNA topoisomerase VI subunit A		2	5	2.2	1	0	1	1	1	1	1	1
IPR010541	Small nuclear ribonucleoprotein Prp3, C-terminal domain		2	5	2.2	1	1	1	1	1	1	1	1
IPR039812	Vesicle-fusing ATPase		2	5	2.2	1	2	0	2	2	1	1	1
IPR013121	Ferric reductase, NAD binding domain		2	4	1.76	2	1	1	1	1	1	1	2
IPR027031	Glycyl-tRNA synthetase/DNA polymerase subunit gamma-2		2	4	1.76	2	1	5	0	0	1	1	2
IPR006266	UMP-CMP kinase		2	4	1.76	1	0	1	1	1	1	1	1
IPR011682	Glycosyl hydrolase family 38, C-terminal		2	4	1.76	5	3	6	1	1	1	1	1
IPR033010	WD repeat Cdc20/Fizzy		2	4	1.76	1	1	0	1	1	1	1	1
IPR016438	ATP-dependent RNA helicase SKI2-like		2	4	1.76	1	0	0	1	0	1	1	1
IPR013049	Spo11/DNA topoisomerase VI, subunit A, N-terminal		2	4	1.76	1	0	0	1	1	1	1	1
IPR002549	Transmembrane protein TqsA-like		2	4	1.76	1	1	1	1	1	1	1	1
IPR009097	Cyclic phosphodiesterase		2	3	1.32	1	1	1	2	1	1	1	0
IPR004083	Regulatory associated protein of TOR		2	3	1.32	1	2	3	1	1	1	1	1
IPR038492	GBBH-like, N-terminal domain superfamily		2	3	1.32	1	1	2	1	1	0	1	0
IPR045208	Initiation factor 4G		2	3	1.32	3	3	4	1	1	1	1	1
IPR025887	Glycoside hydrolase family 31, N-terminal domain		2	3	1.32	6	2	0	1	1	1	1	2
IPR011331	Large ribosomal subunit protein eL37/eL43		2	3	1.32	1	0	0	1	1	1	2	3
IPR045135	26S proteasome regulatory subunit Rpn7, N-terminal		2	3	1.32	1	1	1	1	1	1	1	1
IPR037136	RNA 3'-terminal phosphate cyclase domain superfamily		2	3	1.32	1	1	1	1	1	2	1	1
IPR023797	RNA 3'-terminal phosphate cyclase domain		2	3	1.32	1	1	1	1	1	2	1	1
IPR000228	RNA 3'-terminal phosphate cyclase		2	3	1.32	1	1	1	1	1	2	1	1
IPR002315	Glycyl-tRNA synthetase		2	3	1.32	2	1	1	0	0	1	1	2
IPR037202	ESCRT assembly domain		2	3	1.32	1	1	0	1	1	1	1	1
IPR001576	Phosphoglycerate kinase		2	3	1.32	2	2	3	1	1	0	1	1
IPR036043	Phosphoglycerate kinase superfamily		2	3	1.32	2	2	3	1	1	0	1	1
IPR015824	Phosphoglycerate kinase, N-terminal		2	3	1.32	2	2	3	1	1	0	1	1
IPR026113	tRNA N(3)-methylcytidine methyltransferase METTL2/6/8-like		2	3	1.32	1	1	2	1	0	1	1	1
IPR002818	DJ-1/PfpI		2	3	1.32	2	1	0	1	1	1	2	1
IPR015341	Glycoside hydrolase family 38, central domain		2	3	1.32	5	4	6	1	1	1	1	1
IPR006746	26S proteasome non-ATPase regulatory subunit Rpn12		2	3	1.32	1	1	1	2	3	0	1	1
IPR006968	Root UVB sensitive family		2	3	1.32	2	1	1	3	5	1	1	1
IPR044612	ADP-ribosylation factor-like protein 2/3		2	3	1.32	1	1	2	1	0	2	2	1
IPR041872	Methionyl-tRNA synthetase, anticodon-binding domain		2	3	1.32	1	2	1	1	1	1	1	1
IPR012913	Protein OS9-like domain		2	3	1.32	1	3	2	1	1	1	1	0
IPR011691	Vesicle transport protein SFT2		2	3	1.32	1	2	0	2	2	1	1	1
IPR008429	Cleft lip and palate transmembrane 1		2	3	1.32	1	2	1	1	1	1	1	1
IPR039034	Inositol 3,4-bisphosphate 4-phosphatase		2	2	0.88	1	1	1	1	1	1	1	1
IPR029008	ER membrane protein complex subunit 6-like		2	2	0.88	1	1	1	1	1	0	1	1
IPR025086	SDE2-like, C-terminal domain		2	2	0.88	1	1	1	3	3	1	1	1
IPR003307	W2 domain		2	2	0.88	1	1	0	1	1	1	1	1
IPR045237	Eukaryotic translation initiation factor 3 subunit M eIF3m/COP9 signalosome complex subunit 7 COPS7		2	2	0.88	1	2	0	1	1	0	1	1
IPR036241	NSFL1 cofactor p47, SEP domain superfamily		2	2	0.88	1	1	1	1	1	1	2	1
IPR012989	SEP domain		2	2	0.88	1	1	1	1	1	1	2	1
IPR015418	Chromatin modification-related protein Eaf6		2	2	0.88	1	1	1	1	1	1	1	1
IPR026856	Sialidase family		2	2	0.88	3	2	1	1	1	2	1	1
IPR042092	Pseudouridine synthase, RsuA/RluB/E/F, catalytic domain		2	2	0.88	1	1	1	1	1	1	1	1
IPR038566	Mediator complex, subunit Med6 superfamily		2	2	0.88	1	0	1	2	1	1	1	1
IPR007018	Mediator complex, subunit Med6		2	2	0.88	1	0	1	2	1	1	1	1
IPR005841	Alpha-D-phosphohexomutase superfamily		2	2	0.88	2	0	1	1	1	0	1	2
IPR006544	P-type ATPase, subfamily V		2	2	0.88	1	3	1	1	1	1	1	1
IPR004567	Type II pantothenate kinase		2	2	0.88	1	0	1	1	1	1	1	1
IPR005607	BSD domain		2	2	0.88	2	1	0	1	1	1	1	0
IPR017945	DHBP synthase RibB-like alpha/beta domain superfamily		2	2	0.88	2	2	4	1	1	1	1	1
IPR043573	Polyphosphoinositide phosphatase Fig4-like		2	2	0.88	1	1	3	1	1	1	1	1
IPR004808	AP endonuclease 1		2	2	0.88	2	2	2	0	1	1	1	1
IPR036517	FF domain superfamily		2	2	0.88	1	0	0	1	1	1	1	1
IPR002470	Peptidase S9A, prolyl oligopeptidase		2	2	0.88	1	1	1	1	1	0	1	1
IPR000591	DEP domain		2	2	0.88	2	1	1	1	2	0	1	2
IPR037163	Spermidine synthase, tetramerisation domain superfamily		2	2	0.88	1	1	1	1	1	0	1	1
IPR035246	Spermidine synthase, tetramerisation domain		2	2	0.88	1	1	1	1	1	0	1	1
IPR007873	Glycosyltransferase, ALG3		2	2	0.88	1	1	1	1	1	1	4	1
IPR024224	DENND6		2	2	0.88	1	1	2	1	3	1	1	2
IPR002809	Integral membrane protein EMC3/TMCO1-like		2	2	0.88	1	1	1	1	1	1	1	1
IPR036959	Peptidase C12, ubiquitin carboxyl-terminal hydrolase superfamily		2	2	0.88	1	3	2	1	1	1	1	1
IPR001578	Peptidase C12, ubiquitin carboxyl-terminal hydrolase		2	2	0.88	1	3	2	1	1	1	1	1
IPR001352	Ribonuclease HII/HIII		2	2	0.88	1	1	1	2	2	0	1	2
IPR024567	Ribonuclease HII/HIII domain		2	2	0.88	1	1	1	2	2	0	1	2
IPR045209	rRNA biogenesis protein Rrp5		2	2	0.88	2	1	1	1	1	1	1	1
IPR003358	tRNA (guanine-N-7) methyltransferase, Trmb type		2	2	0.88	1	1	1	1	1	2	2	1
IPR043131	Branched-chain-amino-acid aminotransferase-like, N-terminal		2	2	0.88	1	0	1	1	1	2	2	3
IPR013535	PUL domain		2	2	0.88	1	0	1	0	1	1	1	1
IPR001708	Membrane insertase YidC/ALB3/OXA1/COX18		2	2	0.88	1	1	3	1	1	1	1	1
IPR007872	DPH-type metal-binding domain		2	2	0.88	1	0	0	1	1	1	0	1
IPR036671	DPH-type metal-binding domain superfamily		2	2	0.88	1	0	0	1	1	2	2	2
IPR002504	NAD kinase		2	2	0.88	2	2	2	1	1	0	1	1
IPR038558	SAS-6, N-terminal domain superfamily		2	2	0.88	1	0	0	1	1	1	1	1
IPR032396	Spindle assembly abnormal protein 6, N-terminal		2	2	0.88	1	0	0	1	1	1	1	1
IPR001529	DNA-directed RNA polymerase, M/15kDa subunit		2	2	0.88	1	1	1	1	2	1	1	1
IPR007886	Alanine dehydrogenase/pyridine nucleotide transhydrogenase, N-terminal		2	2	0.88	1	1	1	1	1	1	1	1
IPR039528	DPM1-like		2	2	0.88	1	1	1	2	2	1	1	1
IPR018391	Pyrrolo-quinoline quinone beta-propeller repeat		2	2	0.88	1	0	0	1	1	1	1	1
IPR032282	Hydroxyacylglutathione hydrolase, C-terminal domain		2	2	0.88	0	1	0	2	2	1	1	1
IPR044059	Cns1/TTC4, wheel domain		2	2	0.88	0	1	1	1	1	0	1	2
IPR011041	Soluble quinoprotein glucose/sorbosone dehydrogenase		2	2	0.88	0	0	0	1	1	2	2	2
IPR007751	Domain of unknown function DUF676, lipase-like		2	1	0.44	1	1	1	2	3	1	2	1
IPR044294	Lipase-like		2	1	0.44	1	1	1	2	3	1	2	1
IPR001126	UmuC domain		2	1	0.44	2	2	2	1	1	1	1	0
IPR002500	Phosphoadenosine phosphosulphate reductase		2	1	0.44	1	1	1	1	1	0	1	1
IPR001108	Peptidase A22A, presenilin		2	1	0.44	1	1	2	1	1	1	2	1
IPR042524	Presenilin, C-terminal		2	1	0.44	1	1	1	1	1	1	2	1
IPR044836	TOM1-like protein, plant		2	1	0.44	1	1	0	1	2	0	1	2
IPR009061	Putative DNA-binding domain superfamily		2	1	0.44	1	1	1	1	1	1	1	1
IPR020476	NUDIX hydrolase		2	1	0.44	1	1	0	1	1	0	1	1
IPR037047	PITH domain superfamily		2	1	0.44	1	2	1	0	1	1	1	0
IPR045099	PITH domain-containing protein 1-like		2	1	0.44	1	2	1	0	1	1	1	0
IPR010400	PITH domain		2	1	0.44	1	2	1	0	1	1	1	0
IPR007472	N-end rule aminoacyl transferase, C-terminal		2	1	0.44	4	0	1	1	1	1	1	1
IPR001347	SIS domain		2	1	0.44	1	0	0	1	1	1	1	1
IPR029040	RNA polymerase subunit RPABC4/transcription elongation factor Spt4		2	1	0.44	1	1	1	1	1	1	1	1
IPR014371	Sterol O-acyltransferase, ACAT/DAG/ARE types		2	1	0.44	2	3	2	1	1	1	0	1
IPR004769	Adenylosuccinate lyase		2	1	0.44	1	1	1	1	1	1	1	1
IPR017904	ADF/Cofilin		2	1	0.44	2	2	1	1	1	1	1	1
IPR027105	U4/U6 small nuclear ribonucleoprotein Prp31		2	1	0.44	1	1	1	0	1	0	1	1
IPR019175	Prp31 C-terminal		2	1	0.44	1	1	1	0	1	0	1	1
IPR006132	Aspartate/ornithine carbamoyltransferase, carbamoyl-P binding		2	1	0.44	1	0	0	1	1	1	1	1
IPR036901	Aspartate/ornithine carbamoyltransferase superfamily		2	1	0.44	1	0	1	1	1	1	1	1
IPR006130	Aspartate/ornithine carbamoyltransferase		2	1	0.44	1	0	0	1	1	1	1	1
IPR006131	Aspartate/ornithine carbamoyltransferase, Asp/Orn-binding domain		2	1	0.44	1	0	1	1	1	1	1	1
IPR046350	Cystatin superfamily		2	1	0.44	2	0	1	1	0	1	1	2
IPR044634	J-protein Zuotin/DnaJC2		2	1	0.44	1	0	3	1	1	1	1	1
IPR025687	C4-type zinc-finger of DNA polymerase delta		2	1	0.44	1	2	2	1	0	2	1	1
IPR048696	SHQ1-like, CS domain		2	1	0.44	1	1	1	0	1	1	1	1
IPR036068	Nicotinate phosphoribosyltransferase-like, C-terminal		2	1	0.44	2	4	3	1	1	1	1	1
IPR023302	Peptidase S9A, N-terminal domain		2	1	0.44	1	0	1	1	1	0	1	1
IPR039131	Complex I intermediate-associated protein 30, mitochondrial		2	1	0.44	1	1	1	1	1	1	1	1
IPR013857	NADH:ubiquinone oxidoreductase intermediate-associated protein 30		2	1	0.44	1	1	1	1	1	1	1	1
IPR031615	MYND-like zinc finger		2	1	0.44	1	1	1	1	1	0	1	1
IPR043358	Ras GTPase GNL1-like		2	1	0.44	1	1	0	1	1	1	1	1
IPR045322	E3 ubiquitin-protein ligase HECTD1/TRIP12-like		2	1	0.44	1	0	1	2	2	1	1	1
IPR001674	GMP synthase, C-terminal		2	1	0.44	1	1	0	1	1	2	2	2
IPR018797	FAM98		2	1	0.44	2	1	0	1	1	1	1	1
IPR014719	Ribosomal protein bL12, C-terminal/adaptor protein ClpS-like		2	1	0.44	1	1	1	1	1	1	1	1
IPR007471	N-end aminoacyl transferase, N-terminal		2	1	0.44	3	1	1	1	1	1	1	1
IPR036821	Peptide deformylase superfamily		2	1	0.44	1	2	1	1	1	1	1	1
IPR023635	Peptide deformylase		2	1	0.44	1	2	1	1	1	1	1	1
IPR015795	Pyruvate kinase, C-terminal		2	1	0.44	2	0	0	1	1	1	1	1
IPR001697	Pyruvate kinase		2	1	0.44	2	1	1	1	1	1	1	1
IPR015806	Pyruvate kinase, insert domain superfamily		2	1	0.44	2	1	1	1	1	1	1	1
IPR015793	Pyruvate kinase, barrel		2	1	0.44	2	1	1	1	1	1	1	1
IPR036918	Pyruvate kinase, C-terminal domain superfamily		2	1	0.44	2	0	0	1	1	1	1	1
IPR000891	Pyruvate carboxyltransferase		2	1	0.44	3	1	0	0	1	2	2	1
IPR044712	NAD/FAD transporter SLC25A32-like		2	1	0.44	1	2	1	1	2	1	1	2
IPR001796	Dihydrofolate reductase domain		2	1	0.44	2	1	1	1	1	1	1	1
IPR002060	Squalene/phytoene synthase		2	1	0.44	1	2	2	1	1	0	1	2
IPR035298	26S Proteasome non-ATPase regulatory subunit 13		2	1	0.44	1	1	0	1	1	1	1	1
IPR036480	Carbamoyl-phosphate synthase small subunit, N-terminal domain superfamily		2	1	0.44	1	1	2	0	0	1	1	0
IPR036897	Carbamoyl-phosphate synthetase, large subunit oligomerisation domain superfamily		2	1	0.44	1	1	2	0	1	1	1	0
IPR002474	Carbamoyl-phosphate synthase small subunit, N-terminal domain		2	1	0.44	1	1	2	0	0	1	1	0
IPR005483	Carbamoyl-phosphate synthase large subunit, CPSase domain		2	1	0.44	1	1	2	0	1	1	1	0
IPR005480	Carbamoyl-phosphate synthetase, large subunit oligomerisation domain		2	1	0.44	1	1	2	0	1	1	1	0
IPR040892	RPN1, N-terminal		2	1	0.44	1	1	1	1	1	1	1	1
IPR041433	26S proteasome non-ATPase regulatory subunit RPN1, C-terminal		2	1	0.44	1	1	0	1	1	1	1	1
IPR005016	Serine incorporator/TMS membrane protein		2	1	0.44	1	1	1	1	1	2	2	2
IPR022030	Splicing factor 3A subunit 1, conserved domain		2	1	0.44	1	0	1	1	1	1	1	1
IPR045146	Splicing factor 3A subunit 1		2	1	0.44	1	2	3	1	1	1	1	1
IPR015310	Activator of Hsp90 ATPase AHSA1-like, N-terminal		2	1	0.44	1	1	1	1	1	1	1	1
IPR036338	Activator of Hsp90 ATPase, Aha1		2	1	0.44	1	1	1	1	1	1	1	1
IPR038377	Sodium/glucose symporter superfamily		2	1	0.44	1	1	1	2	2	1	1	2
IPR001734	Sodium/solute symporter		2	1	0.44	1	1	1	2	2	1	1	2
IPR011876	Isopentenyl-diphosphate delta-isomerase, type 1		2	1	0.44	1	0	1	1	1	1	1	1
IPR034099	Small nuclear ribonucleoprotein Sm D3		2	1	0.44	1	2	1	1	1	2	1	1
IPR017905	ERV/ALR sulfhydryl oxidase domain		2	1	0.44	1	1	1	1	1	1	1	1
IPR039799	Sulfhydryl oxidase ALR/ERV		2	1	0.44	1	1	1	1	1	1	1	1
IPR036774	ERV/ALR sulfhydryl oxidase domain superfamily		2	1	0.44	1	1	1	1	1	1	1	1
IPR003338	CDC48, N-terminal subdomain		2	1	0.44	1	0	0	1	3	0	1	1
IPR045004	Enoyl-CoA hydratase/isomerase domain		2	1	0.44	1	1	0	1	1	1	1	1
IPR032259	Enoyl-CoA hydratase/isomerase, HIBYL-CoA-H type		2	1	0.44	1	1	0	1	1	1	1	1
IPR004403	Peptide chain release factor eRF1/aRF1		2	1	0.44	1	1	0	2	2	1	1	2
IPR040848	Midasin, AAA lid domain 7		2	1	0.44	1	0	2	0	1	2	1	1
IPR036128	Plus3-like superfamily		2	1	0.44	1	1	1	1	1	1	1	1
IPR004343	Plus-3 domain		2	1	0.44	1	1	1	1	1	1	1	1
IPR027244	Vacuolar membrane-associated protein Iml1		2	1	0.44	0	1	1	1	0	1	0	1
IPR044993	Beta-D-xylosidase		2	0	0	7	5	7	1	1	0	0	1
IPR013094	Alpha/beta hydrolase fold-3		2	0	0	5	4	4	1	1	1	1	1
IPR022035	PCIF1, WW domain		2	0	0	1	1	1	1	1	3	2	1
IPR011184	DNA mismatch repair Msh2-type		2	0	0	1	0	1	1	1	1	2	1
IPR012312	Hemerythrin-like		2	0	0	1	1	1	1	1	0	1	1
IPR006722	Trafficking protein particle complex subunit 2		2	0	0	2	3	2	1	1	0	0	0
IPR032482	Protein of unknown function DUF5054		2	0	0	1	1	0	1	1	1	1	1
IPR001597	Aromatic amino acid beta-eliminating lyase/threonine aldolase		2	0	0	1	1	1	1	1	1	1	1
IPR039191	Nopp140-like		2	0	0	1	1	1	1	0	1	1	1
IPR039204	Magnesium transporter MRS2-like		2	0	0	1	2	1	1	1	1	1	1
IPR026956	D-serine dehydratase-like domain		2	0	0	1	1	1	1	1	1	1	1
IPR035686	Carbamoyl-phosphate synthase small subunit, GATase1 domain		2	0	0	1	1	2	0	1	1	1	0
IPR002550	CNNM, transmembrane domain		2	0	0	1	1	2	1	1	1	1	1
IPR045095	Ancient conserved domain protein family		2	0	0	1	1	2	1	1	1	1	1
IPR026721	Transmembrane protein 18		2	0	0	1	1	0	1	1	1	0	1
IPR036264	Bacterial exopeptidase dimerisation domain		2	0	0	0	0	0	1	1	1	1	1
IPR047155	COMM domain-containing protein 4/6/7/8		2	0	0	0	0	0	1	1	1	1	1
IPR015815	3-hydroxyisobutyrate dehydrogenase-related		2	0	0	0	1	0	2	2	1	1	2
IPR027012	Enkurin domain		2	2	0.88	0	0	0	0	0	0	0	0
IPR002259	Equilibrative nucleoside transporter		2	2	0.88	0	0	0	0	0	0	0	0
IPR043138	Gamma-glutamyltranspeptidase, large subunit, C-terminal domain		2	1	0.44	0	0	0	0	0	0	0	0
IPR043137	Gamma-glutamyltranspeptidase, small subunit		2	2	0.88	0	0	0	0	0	0	0	0
IPR014025	Glutaredoxin subgroup		2	2	0.88	0	0	0	0	0	0	0	0
IPR017978	GPCR family 3, C-terminal		2	116	51.04	0	0	0	0	0	0	0	0
IPR039308	Growth arrest-specific protein 8		2	2	0.88	0	0	0	0	0	0	0	0
IPR025593	Growth arrest-specific protein 8 domain		2	2	0.88	0	0	0	0	0	0	0	0
IPR016346	Guanine nucleotide-binding protein, beta subunit		2	2	0.88	0	0	0	0	0	0	0	0
IPR029488	Hemingway/CFA97		2	12	5.28	0	0	0	0	0	0	0	0
IPR030445	Histone H3-K79 methyltransferase		2	3	1.32	0	0	0	0	0	0	0	0
IPR008220	Homoserine/serine acetyltransferase MetX-like		2	3	1.32	0	0	0	0	0	0	0	0
IPR017782	Hydroxyacylglutathione hydrolase		2	1	0.44	0	0	0	0	0	0	0	0
IPR037695	IQ and ubiquitin-like domain-containing protein		2	1	0.44	0	0	0	0	0	0	0	0
IPR006164	Ku70/Ku80 beta-barrel domain		2	2	0.88	0	0	0	0	0	0	0	0
IPR039672	Lactose permease-like		2	1	0.44	0	0	0	0	0	0	0	0
IPR000034	Laminin IV		2	2	0.88	0	0	0	0	0	0	0	0
IPR018392	LysM domain		2	3	1.32	0	0	0	0	0	0	0	0
IPR036779	LysM domain superfamily		2	2	0.88	0	0	0	0	0	0	0	0
IPR001258	NHL repeat		2	1	0.44	0	0	0	0	0	0	0	0
IPR041664	Orc1-like, AAA ATPase domain		2	4	1.76	0	0	0	0	0	0	0	0
IPR002579	Peptide methionine sulphoxide reductase MrsB domain		2	2	0.88	0	0	0	0	0	0	0	0
IPR012981	PIH1, N-terminal		2	5	2.2	0	0	0	0	0	0	0	0
IPR019135	Polycomb protein, VEFS-Box		2	1	0.44	0	0	0	0	0	0	0	0
IPR003915	Polycystic kidney disease type 2 protein		2	1	0.44	0	0	0	0	0	0	0	0
IPR045866	Protein FAM210A/B-like		2	2	0.88	0	0	0	0	0	0	0	0
IPR039093	Protein XRP2		2	2	0.88	0	0	0	0	0	0	0	0
IPR016201	PSI domain		2	1	0.44	0	0	0	0	0	0	0	0
IPR009290	Radial spoke 3		2	3	1.32	0	0	0	0	0	0	0	0
IPR044736	Ran-binding protein Vid30/RanBPM/SPLA, SPRY domain		2	2	0.88	0	0	0	0	0	0	0	0
IPR002666	Reduced folate carrier		2	2	0.88	0	0	0	0	0	0	0	0
IPR008805	RIB43A		2	3	1.32	0	0	0	0	0	0	0	0
IPR047261	rRNA methyltransferase 1, methyltransferase domain		2	1	0.44	0	0	0	0	0	0	0	0
IPR012280	Semialdehyde dehydrogenase, dimerisation domain		2	2	0.88	0	0	0	0	0	0	0	0
IPR039942	Somatomedin-B and thrombospondin type-1 domain-containing protein		2	1	0.44	0	0	0	0	0	0	0	0
IPR016194	SPOC-like, C-terminal domain superfamily		2	2	0.88	0	0	0	0	0	0	0	0
IPR044004	Spondin-like TSP1 domain		2	8	3.52	0	0	0	0	0	0	0	0
IPR033362	SSNA1 family		2	5	2.2	0	0	0	0	0	0	0	0
IPR030511	Tetratricopeptide repeat protein 26		2	2	0.88	0	0	0	0	0	0	0	0
IPR040468	TRAF3-interacting protein 1, N-terminal		2	2	0.88	0	0	0	0	0	0	0	0
IPR042576	TRAF3-interacting protein 1, N-terminal domain superfamily		2	2	0.88	0	0	0	0	0	0	0	0
IPR002931	Transglutaminase-like		2	1	0.44	0	0	0	0	0	0	0	0
IPR019184	Uncharacterised protein family, transmembrane-17		2	1	0.44	0	0	0	0	0	0	0	0
IPR032816	VTT domain		2	4	1.76	0	0	0	0	0	0	0	0
IPR006047	Glycosyl hydrolase, family 13, catalytic domain		2	7	3.08	3	2	3	1	1	1	1	3
IPR006148	Glucosamine/galactosamine-6-phosphate isomerase		2	6	2.64	1	2	1	3	2	0	1	2
IPR002044	Carbohydrate binding module family 20		2	5	2.2	1	1	0	2	2	2	2	1
IPR044609	Peptidyl-prolyl cis-trans isomerase FKBP2/11		2	5	2.2	1	1	1	2	2	1	2	2
IPR000977	DNA ligase, ATP-dependent		2	4	1.76	2	0	1	2	0	2	1	2
IPR036477	Formyl transferase, N-terminal domain superfamily		2	4	1.76	2	1	0	2	2	1	2	1
IPR002376	Formyl transferase, N-terminal		2	4	1.76	2	1	0	2	2	1	2	1
IPR041505	Dis3-like cold-shock domain 2		2	3	1.32	2	1	1	1	2	2	2	1
IPR003838	ABC3 transporter permease protein domain		2	3	1.32	2	0	1	2	3	1	1	2
IPR025721	Exosome complex component, N-terminal domain		2	3	1.32	2	3	1	2	1	1	1	2
IPR038252	Ubiquitin-activating enzyme E1, C-terminal domain superfamily		2	3	1.32	1	2	1	2	2	1	2	1
IPR009044	ssDNA-binding transcriptional regulator		2	3	1.32	2	1	2	2	2	1	1	1
IPR045307	ADCK1-like domain		2	3	1.32	2	1	0	2	2	1	2	1
IPR005845	Alpha-D-phosphohexomutase, alpha/beta/alpha domain II		2	2	0.88	2	1	1	2	2	1	1	2
IPR040608	Snf8/Vps36 family		2	2	0.88	1	0	0	2	2	1	2	2
IPR006158	Cobalamin (vitamin B12)-binding domain		2	2	0.88	2	2	1	2	2	1	1	1
IPR040134	26S Proteasome non-ATPase regulatory subunit 12/COP9 signalosome complex subunit 4		2	2	0.88	1	2	1	2	3	1	1	2
IPR017911	MacB-like, ATP-binding domain		2	2	0.88	3	1	1	2	2	1	1	2
IPR029154	3-hydroxyisobutyrate dehydrogenase-like, NAD-binding domain		2	2	0.88	1	1	0	2	2	1	2	2
IPR007646	RNA polymerase Rpb2, domain 4		2	2	0.88	1	2	1	1	1	2	2	2
IPR032629	Mon2/Sec7/BIG1-like, dimerisation and cyclophilin-binding domain		2	1	0.44	3	1	1	1	1	2	2	3
IPR030559	DNA polymerase zeta catalytic subunit		2	1	0.44	1	4	3	2	3	1	0	1
IPR001632	G-protein, beta subunit		2	1	0.44	1	1	1	2	2	2	2	1
IPR003653	Ulp1 protease family, C-terminal catalytic domain		2	79	34.76	5	3	2	2	1	2	2	3
IPR001227	Acyl transferase domain superfamily		2	16	7.04	4	2	3	2	2	2	1	2
IPR014043	Acyl transferase		2	12	5.28	4	1	3	2	2	2	1	2
IPR006357	HAD-superfamily hydrolase, subfamily IIA		2	11	4.84	5	5	4	2	2	2	1	2
IPR016435	Diphthamide synthesis DPH1/DPH2		2	9	3.96	3	2	2	2	3	1	1	2
IPR043472	Macro domain-like		2	9	3.96	3	5	2	2	2	2	2	2
IPR042265	Diphthamide synthesis DPH1/DPH2, domain 3		2	8	3.52	3	2	1	2	2	1	1	2
IPR001930	Peptidase M1, alanine aminopeptidase/leukotriene A4 hydrolase		2	8	3.52	2	1	1	2	2	2	2	2
IPR035991	Casein kinase II subunit beta-like		2	8	3.52	2	2	2	3	4	2	2	4
IPR000704	Casein kinase II, regulatory subunit		2	8	3.52	2	2	2	3	4	2	2	4
IPR016149	Casein kinase II, regulatory subunit, N-terminal		2	8	3.52	2	2	2	2	4	2	2	4
IPR042263	Diphthamide synthesis DPH1/DPH2, domain 1		2	7	3.08	3	2	2	2	2	1	1	2
IPR008532	NFACT, RNA-binding domain		2	7	3.08	2	2	0	2	2	1	2	2
IPR037027	YqgF/RNase H-like domain superfamily		2	7	3.08	2	2	3	2	2	1	3	2
IPR024395	CLASP N-terminal domain		2	7	3.08	1	2	3	2	1	2	2	3
IPR002013	SAC domain		2	6	2.64	2	1	4	3	2	2	2	2
IPR016188	PurM-like, N-terminal domain		2	6	2.64	3	1	0	2	2	1	2	2
IPR045853	Peptide chain release factor class I superfamily		2	5	2.2	2	1	1	2	2	2	2	2
IPR012309	DNA ligase, ATP-dependent, C-terminal		2	5	2.2	2	2	1	2	1	2	1	2
IPR035925	BSD domain superfamily		2	5	2.2	2	3	2	2	2	2	2	0
IPR006636	Heat shock chaperonin-binding		2	5	2.2	2	2	2	2	2	1	2	3
IPR001645	Folylpolyglutamate synthetase		2	5	2.2	3	4	3	2	2	2	2	2
IPR036615	Mur ligase, C-terminal domain superfamily		2	5	2.2	3	3	3	2	2	1	2	2
IPR036565	Mur-like, catalytic domain superfamily		2	5	2.2	3	3	3	2	2	2	2	2
IPR008580	PPPDE peptidase domain		2	5	2.2	1	1	1	2	2	3	3	3
IPR042266	PPPDE peptidase domain superfamily		2	5	2.2	1	1	1	2	2	4	4	3
IPR029067	CDC48 domain 2-like superfamily		2	5	2.2	2	0	0	3	5	2	2	2
IPR000156	Ran binding domain		2	4	1.76	1	1	1	3	2	2	2	2
IPR002306	Tryptophan-tRNA ligase		2	4	1.76	2	2	1	2	2	2	2	2
IPR017261	DNA mismatch repair protein MutS/MSH		2	4	1.76	3	1	1	3	1	2	2	3
IPR026699	Exosome complex RNA-binding protein 1/RRP40/RRP4		2	4	1.76	2	2	2	2	3	0	1	2
IPR000407	Nucleoside phosphatase GDA1/CD39		2	4	1.76	1	1	0	2	2	2	2	2
IPR031335	Glycosyl hydrolase family 63, C-terminal		2	4	1.76	1	2	2	1	3	2	3	2
IPR004888	Glycoside hydrolase family 63		2	4	1.76	1	3	2	1	3	2	3	2
IPR002913	START domain		2	4	1.76	4	2	3	0	1	1	2	2
IPR036314	Manganese/iron superoxide dismutase, C-terminal domain superfamily		2	4	1.76	2	2	2	2	2	2	2	2
IPR019832	Manganese/iron superoxide dismutase, C-terminal		2	4	1.76	2	2	2	2	2	2	2	2
IPR001310	Histidine triad (HIT) protein		2	4	1.76	1	0	2	2	2	2	2	3
IPR013657	SLC35B1-4/HUT1		2	4	1.76	2	1	1	2	2	2	2	2
IPR041366	Pre-PUA domain		2	4	1.76	2	2	1	2	2	1	1	2
IPR040194	Cwf19-like protein		2	4	1.76	2	3	3	2	2	1	2	2
IPR015633	E2F Family		2	4	1.76	3	3	3	1	2	2	2	1
IPR002320	Threonine-tRNA ligase, class IIa		2	4	1.76	2	1	1	2	2	2	1	2
IPR036747	Histone chaperone ASF1-like superfamily		2	4	1.76	1	2	2	2	2	1	2	2
IPR009025	DNA-directed RNA polymerase, RBP11-like dimerisation domain		2	3	1.32	2	3	2	2	3	1	2	2
IPR003337	Trehalose-phosphatase		2	3	1.32	2	3	0	2	2	2	2	2
IPR001830	Glycosyl transferase, family 20		2	3	1.32	2	3	0	2	2	2	2	2
IPR045089	Prenyltransferase subunit beta		2	3	1.32	2	2	2	3	3	2	2	2
IPR001330	PFTB repeat		2	3	1.32	2	2	2	3	3	2	2	2
IPR000535	Major sperm protein (MSP) domain		2	3	1.32	1	1	2	2	2	1	2	2
IPR007034	Ribosome biogenesis protein BMS1/TSR1, C-terminal		2	3	1.32	2	1	0	2	2	2	2	2
IPR012948	AARP2CN		2	3	1.32	2	1	0	2	1	2	2	2
IPR039761	Ribosome biogenesis protein Bms1/Tsr1		2	3	1.32	2	1	1	3	2	2	2	2
IPR002319	Phenylalanyl-tRNA synthetase		2	3	1.32	3	2	2	2	2	2	3	3
IPR011530	Ribosomal RNA adenine dimethylase		2	3	1.32	2	1	2	2	3	1	2	2
IPR004522	Asparagine-tRNA ligase		2	3	1.32	2	2	1	2	2	1	2	1
IPR037363	Sec13/Seh1 family		2	3	1.32	2	4	2	2	2	1	1	2
IPR020810	Enolase, C-terminal TIM barrel domain		2	3	1.32	2	2	1	2	2	2	2	2
IPR000941	Enolase		2	3	1.32	2	2	1	2	2	2	2	2
IPR029017	Enolase-like, N-terminal		2	3	1.32	2	2	1	2	2	2	2	2
IPR036849	Enolase-like, C-terminal domain superfamily		2	3	1.32	2	2	1	2	2	2	2	2
IPR020811	Enolase, N-terminal		2	3	1.32	2	2	1	2	2	2	2	2
IPR039175	Mitochondrial import inner membrane translocase subunit TIM22		2	3	1.32	2	1	2	2	2	2	1	2
IPR002075	Nuclear transport factor 2 domain		2	3	1.32	2	3	2	3	3	2	2	2
IPR045149	Protein OS-9-like		2	3	1.32	2	3	2	2	2	2	2	1
IPR007305	Vesicle transport protein, Got1/SFT2-like		2	3	1.32	2	3	1	3	3	2	2	2
IPR036324	Manganese/iron superoxide dismutase, N-terminal domain superfamily		2	3	1.32	2	2	2	2	2	1	2	2
IPR001189	Manganese/iron superoxide dismutase		2	3	1.32	2	2	2	2	2	2	2	2
IPR019831	Manganese/iron superoxide dismutase, N-terminal		2	3	1.32	2	2	2	2	2	1	2	2
IPR024909	Cysteinyl-tRNA synthetase/mycothiol ligase		2	3	1.32	2	2	2	2	2	1	2	2
IPR033911	Methioninyl-tRNA synthetase core domain		2	3	1.32	2	3	1	2	2	2	2	2
IPR002088	Protein prenyltransferase, alpha subunit		2	3	1.32	2	2	2	2	3	2	2	3
IPR006166	ERCC4 domain		2	3	1.32	3	2	2	2	2	2	2	2
IPR034666	Arp2/3 complex subunit 2/4		2	3	1.32	2	2	1	2	2	2	2	2
IPR043132	Branched-chain-amino-acid aminotransferase-like, C-terminal		2	3	1.32	2	1	1	2	2	2	2	3
IPR001544	Aminotransferase class IV		2	3	1.32	2	1	1	2	2	2	2	3
IPR012974	Nucleolar protein 58/56, N-terminal		2	3	1.32	2	1	1	3	3	1	3	2
IPR018965	Ubiquitin-activating enzyme E1, C-terminal		2	3	1.32	1	2	1	2	2	1	2	2
IPR032420	Ubiquitin-activating enzyme E1, four-helix bundle		2	3	1.32	1	3	1	2	2	1	2	2
IPR038324	Rpb4/RPC9 superfamily		2	3	1.32	2	2	1	2	2	1	2	2
IPR003697	Nucleoside triphosphate pyrophosphatase Maf-like protein		2	3	1.32	2	2	2	2	3	2	2	2
IPR000872	Tafazzin		2	3	1.32	3	2	1	2	3	2	2	2
IPR033728	Threonine-tRNA ligase catalytic core domain		2	3	1.32	2	1	0	2	2	2	1	2
IPR006977	Yip1 domain		2	3	1.32	2	5	4	2	2	2	1	2
IPR028934	Vacuolar protein sorting protein 26 related		2	3	1.32	1	2	4	1	1	2	3	3
IPR033248	Transketolase, C-terminal domain		2	3	1.32	2	2	2	1	2	2	2	2
IPR036063	Smr domain superfamily		2	3	1.32	1	3	2	1	2	2	2	2
IPR036838	Small ribosomal subunit protein uS10 domain superfamily		2	3	1.32	0	1	0	4	4	2	2	3
IPR045231	Protein Yip1/4-like		2	2	0.88	2	3	2	2	2	2	2	2
IPR007369	Peptidase A22B, signal peptide peptidase		2	2	0.88	2	4	2	2	2	2	2	3
IPR001075	NIF system FeS cluster assembly, NifU, C-terminal		2	2	0.88	2	2	1	3	3	1	2	2
IPR036498	Scaffold protein Nfu/NifU, N-terminal domain superfamily		2	2	0.88	2	2	2	3	2	2	2	2
IPR000361	FeS cluster biogenesis		2	2	0.88	1	2	1	2	3	2	2	2
IPR016092	FeS cluster insertion protein		2	2	0.88	2	2	1	2	3	2	2	2
IPR035903	HesB-like domain superfamily		2	2	0.88	2	2	1	2	3	2	2	2
IPR045183	F-box-like/WD repeat-containing protein Ebi-like		2	2	0.88	1	1	1	2	2	2	2	2
IPR009022	Elongation factor G, domain III		2	2	0.88	1	1	1	2	2	2	2	2
IPR002616	tRNA-guanine(15) transglycosylase-like		2	2	0.88	2	1	2	2	2	2	2	2
IPR036511	Queuine tRNA-ribosyltransferase-like		2	2	0.88	2	1	2	2	2	2	2	2
IPR017861	Kae1/TsaD family		2	2	0.88	2	1	2	2	2	1	2	2
IPR000905	Gcp-like domain		2	2	0.88	2	3	2	2	2	2	2	2
IPR006984	rRNA-processing protein Fcf1/Utp23		2	2	0.88	2	2	0	2	2	2	2	2
IPR001253	Translation initiation factor 1A (eIF-1A)		2	2	0.88	2	2	1	2	2	2	2	2
IPR027470	Cation efflux protein, cytoplasmic domain		2	2	0.88	2	3	2	2	2	1	1	2
IPR004131	Pyrophosphate-energised proton pump		2	2	0.88	2	3	2	2	2	1	1	1
IPR010708	5'(3')-deoxyribonucleotidase		2	2	0.88	1	2	1	3	3	2	3	2
IPR044281	U3 snoRNP protein/Ribosome production factor 1		2	2	0.88	2	2	1	2	2	1	2	2
IPR036286	LexA/Signal peptidase-like superfamily		2	2	0.88	2	2	1	3	3	2	2	4
IPR019533	Peptidase S26		2	2	0.88	2	2	1	3	3	1	1	3
IPR005846	Alpha-D-phosphohexomutase, alpha/beta/alpha domain III		2	2	0.88	2	1	1	2	2	1	2	2
IPR005037	Pre-mRNA-splicing factor 38		2	2	0.88	2	2	2	2	2	2	2	2
IPR036891	Signal recognition particle, SRP54 subunit, M-domain superfamily		2	2	0.88	2	2	2	2	2	2	2	2
IPR004125	Signal recognition particle, SRP54 subunit, M-domain		2	2	0.88	2	1	1	2	2	2	2	2
IPR006762	Gtr1/RagA G protein		2	2	0.88	2	2	2	2	2	3	2	2
IPR015195	SLIDE domain		2	2	0.88	2	2	1	2	2	2	3	3
IPR036225	SRP/SRP receptor, N-terminal		2	2	0.88	2	2	2	2	2	2	2	2
IPR000897	Signal recognition particle, SRP54 subunit, GTPase domain		2	2	0.88	2	2	3	2	2	2	2	2
IPR042101	Signal recognition particle SRP54, N-terminal domain superfamily		2	2	0.88	2	2	3	2	2	2	2	2
IPR013758	DNA topoisomerase, type IIA, domain A, alpha-beta		2	2	0.88	1	1	1	2	2	3	2	2
IPR002205	DNA topoisomerase, type IIA, domain A		2	2	0.88	1	2	1	2	2	3	2	2
IPR001154	DNA topoisomerase II, eukaryotic-type		2	2	0.88	1	1	1	2	3	3	2	2
IPR013760	DNA topoisomerase, type IIA-like domain superfamily		2	2	0.88	1	2	1	2	3	3	2	2
IPR003788	Protein arginine methyltransferase NDUFAF7		2	2	0.88	2	2	2	3	2	2	2	2
IPR005140	eRF1 domain 1/Pelota-like		2	2	0.88	2	2	0	3	3	2	2	3
IPR005142	eRF1 domain 3		2	2	0.88	1	2	0	3	3	2	2	3
IPR007209	RNase L inhibitor RLI-like, possible metal-binding domain		2	2	0.88	2	2	3	3	3	1	1	2
IPR013085	U1-C, C2H2-type zinc finger		2	2	0.88	2	2	3	2	2	1	2	2
IPR036724	Cobalamin-binding domain superfamily		2	2	0.88	2	2	2	2	2	1	1	1
IPR014730	Electron transfer flavoprotein, alpha/beta-subunit, N-terminal		2	2	0.88	2	2	1	2	2	2	2	2
IPR007233	Trafficking protein particle complex subunit		2	2	0.88	2	2	1	2	2	2	2	1
IPR016073	SKP1 component, POZ domain		2	2	0.88	2	2	2	1	2	3	4	3
IPR002735	Translation initiation factor IF2/IF5 domain		2	2	0.88	2	2	1	2	2	2	2	2
IPR045196	Translation initiation factor IF2/IF5		2	2	0.88	2	2	1	2	2	2	2	2
IPR016189	Translation initiation factor IF2/IF5, N-terminal		2	2	0.88	2	2	1	2	2	2	2	2
IPR016190	Translation initiation factor IF2/IF5, zinc-binding		2	2	0.88	2	2	1	2	2	2	2	2
IPR026971	Condensin subunit 1/Condensin-2 complex subunit D3		2	2	0.88	2	5	2	1	3	2	2	3
IPR032682	Condensin complex subunit 1, C-terminal		2	2	0.88	3	1	2	1	2	3	2	2
IPR003511	HORMA domain		2	2	0.88	2	2	2	2	1	1	2	3
IPR040346	GEX1/Brambleberry		2	2	0.88	2	3	2	1	2	2	2	2
IPR032418	Ubiquitin-activating enzyme E1, FCCH domain		2	2	0.88	1	3	1	2	2	1	2	2
IPR024931	Importin subunit alpha		2	2	0.88	1	2	1	2	3	2	2	2
IPR041715	Class II Histidinyl-tRNA synthetase (HisRS)-like catalytic core domain		2	2	0.88	2	1	1	2	2	2	2	2
IPR015807	Histidine-tRNA ligase		2	2	0.88	2	1	1	2	2	1	2	2
IPR018485	Carbohydrate kinase FGGY, C-terminal		2	2	0.88	2	2	2	2	2	1	1	2
IPR041706	YchF, N-terminal		2	2	0.88	2	1	1	3	4	3	2	2
IPR013810	Small ribosomal subunit protein uS5, N-terminal		2	2	0.88	2	2	1	2	2	3	3	3
IPR002934	Polymerase, nucleotidyl transferase domain		2	2	0.88	1	2	2	2	2	2	2	1
IPR000701	Succinate dehydrogenase/fumarate reductase type B, transmembrane subunit		2	2	0.88	1	0	1	2	2	2	2	2
IPR044677	Mitochondrial phosphate carrier protein SLC25A3/Pic2/Mir1-like		2	2	0.88	1	0	1	2	2	2	2	2
IPR007647	RNA polymerase Rpb2, domain 5		2	2	0.88	2	2	1	1	1	2	2	2
IPR006259	Adenylate kinase subfamily		2	2	0.88	0	1	0	2	2	2	4	4
IPR045862	Nucleotidyltransferase Trf4-like		2	1	0.44	3	3	3	2	2	2	2	2
IPR013650	ATP-grasp fold, succinyl-CoA synthetase-type		2	1	0.44	3	2	1	2	2	2	2	2
IPR005809	Succinate--CoA ligase-like, beta subunit		2	1	0.44	3	2	2	2	2	2	2	2
IPR014824	Scaffold protein Nfu/NifU, N-terminal		2	1	0.44	2	2	2	3	2	2	2	2
IPR004480	Monothiol glutaredoxin-related		2	1	0.44	2	2	1	2	2	2	2	2
IPR033658	Glutaredoxin, PICOT-like		2	1	0.44	2	2	1	2	1	2	2	2
IPR002014	VHS domain		2	1	0.44	2	2	1	2	2	2	3	2
IPR003172	MD-2-related lipid-recognition domain		2	1	0.44	5	3	2	2	2	1	1	1
IPR013749	Pyridoxamine kinase/Phosphomethylpyrimidine kinase		2	1	0.44	3	2	0	2	3	2	2	2
IPR006196	RNA-binding domain, S1, IF1 type		2	1	0.44	2	2	1	2	2	2	2	2
IPR033646	CLU central domain		2	1	0.44	1	1	0	3	5	2	2	2
IPR013757	DNA topoisomerase, type IIA, alpha-helical domain superfamily		2	1	0.44	1	1	1	2	2	3	2	2
IPR001241	DNA topoisomerase, type IIA		2	1	0.44	1	1	1	2	2	3	2	2
IPR013759	DNA topoisomerase, type IIA, subunit B, C-terminal		2	1	0.44	1	1	1	2	2	3	2	2
IPR013506	DNA topoisomerase, type IIA, subunit B, domain 2		2	1	0.44	1	1	1	2	2	3	2	2
IPR031660	C-terminal associated domain of TOPRIM		2	1	0.44	1	1	1	2	2	3	2	2
IPR023591	Small ribosomal subunit protein uS2, flavodoxin-like domain superfamily		2	1	0.44	3	1	0	3	3	1	2	2
IPR001865	Small ribosomal subunit protein uS2		2	1	0.44	3	1	0	3	3	1	2	2
IPR044635	Ubiquitin carboxyl-terminal hydrolase 14-like		2	1	0.44	1	3	3	2	2	1	2	2
IPR048720	PROPPIN		2	1	0.44	1	1	2	2	1	2	3	2
IPR033468	Metaxin, glutathione S-transferase domain		2	1	0.44	1	0	2	2	2	2	2	2
IPR039123	Protein phosphatase PTC7 homolog		2	1	0.44	2	2	2	2	2	2	2	2
[truncated: 5,779 more rows]

## Sheet: Sheet1
CroBVI	Plac	Blastoise	Her	Steve	Nand	JDR	DL	NMH	BT1		336	602	43	40	33	27	9	28	24
12	22	1	1	0	0	0	0	0	0		CroBVI	Plac	Blastoise	Her	Steve	Nand	JDR	DL	NMH	BT1
3	6	0	0	0	0	0	0	0	0
3	4	0	0	0	0	0	0	0	0
3	3	0	0	0	0	0	0	0	0
3	2	0	0	0	0	0	0	0	0
1	5	0	0	0	0	0	0	0	0
1	5	0	0	0	0	0	0	0	0
1	4	0	0	0	0	0	0	0	0
1	4	0	0	0	0	0	0	0	0
1	3	0	0	0	0	0	0	0	0
1	1	0	0	0	0	0	0	0	0
1	1	0	0	0	0	0	0	0	0
1	1	0	0	0	0	0	0	0	0
1	1	0	0	0	0	0	0	0	0
1	1	0	0	0	0	0	0	0	0
1	1	0	0	0	0	0	0	0	0
24	85	1	3	1	1	0	1	1	1
20	27	1	1	1	1	0	1	1	1
19	28	1	1	1	1	0	1	1	1
19	24	1	1	1	1	0	1	1	1
17	39	1	1	1	1	0	1	1	1
17	34	1	1	1	1	0	1	1	1
17	31	1	1	1	1	0	1	1	1
17	28	1	1	1	1	0	1	1	1
17	27	1	1	1	1	0	1	1	1
17	26	1	1	1	1	0	1	1	1
17	26	1	1	1	1	0	1	1	1
17	25	1	1	1	1	0	1	1	1
16	25	1	1	1	1	0	1	1	1
16	24	1	1	1	1	0	1	1	1
8	11	1	1	0	0	0	1	0	1
12	21	1	1	1	1	0	1	1	1
5	9	1	1	1	0	0	0	0	1
9	9	1	1	1	1	1	1	1	1										IPR041589	Dynein heavy chain 3, AAA+ lid domain	#VALUE!	Dynein
8	11	1	1	0	2	1	2	1	2										IPR019347	Axonemal dynein light chain	#VALUE!	Dynein
6	19	17	12	11	2	2	3	1	2										IPR039750	Dynein regulatory complex protein	#VALUE!	Dynein
1	2	1	1	1	1	1	1	1	1										IPR039505	Dynein regulatory complex protein 1/2, N-terminal	#VALUE!	Dynein
0	1	1	1	1	1	1	0	0	0										IPR033192	Outer dynein arm-docking complex subunit 3	#VALUE!	Dynein
0	1	1	1	1	1	1	1	1	1										IPR039304	Dynein assembly factor 3, axonemal	#VALUE!	Dynein
0	0	1	1	1	2	0	2	2	2										IPR028235	Dynein assembly factor 3, C-terminal domain	#VALUE!	Dynein
1	0	1	1	0	0	0	0	0	0										IPR029440	Dynein regulatory complex protein 1, C-terminal	#VALUE!	Dynein
0	3	0	0	0	0	0	0	0	0										IPR042618	Dynein regulatory complex protein 9	#VALUE!	Dynein
0	1	0	0	0	0	0	0	0	0										IPR033551	Dynein regulatory complex subunit 7	#VALUE!	Dynein
0	1	1	1	1	1	1	1	1	1										IPR042505	Cytoplasmic dynein 2 intermediate chain 1	#VALUE!	Dynein
1	0	0	0	0	1	1	1	1	1										IPR049400	Cytoplasmic dynein 2 heavy chain 1, AAA+ ATPase domain	#VALUE!	Dynein
																			IPR023247	Dynein-f, intermediate chain IC97/Dnai7-like	#VALUE!	Dynein
																			IPR031733	Dynein attachment factor, N-terminal	#VALUE!	Dynein
																			IPR026697	Dynein axonemal assembly factor 6	#VALUE!	Dynein
																			IPR040045	Cytoplasmic dynein 2 light intermediate chain 1	#VALUE!	Dynein
																			IPR026983	Dynein heavy chain	#VALUE!	Dynein
																			IPR024743	Dynein heavy chain, coiled coil stalk	#VALUE!	Dynein
																			IPR035699	Dynein heavy chain, hydrolytic ATP-binding dynein motor region	#VALUE!	Dynein
																			IPR043157	Dynein heavy chain, AAA1 domain, small subdomain	#VALUE!	Dynein
																			IPR035706	Dynein heavy chain, ATP-binding dynein motor region	#VALUE!	Dynein
																			IPR041228	Dynein heavy chain, C-terminal domain	#VALUE!	Dynein
																			IPR043160	Dynein heavy chain, C-terminal domain, barrel region	#VALUE!	Dynein
																			IPR013602	Dynein heavy chain, linker	#VALUE!	Dynein
																			IPR042219	Dynein heavy chain AAA lid domain superfamily	#VALUE!	Dynein
																			IPR004273	Dynein heavy chain region D6 P-loop domain	#VALUE!	Dynein
																			IPR042222	Dynein heavy chain, domain 2, N-terminal	#VALUE!	Dynein
																			IPR042228	Dynein heavy chain, linker, subdomain 3	#VALUE!	Dynein
																			IPR041658	Dynein heavy chain AAA lid domain	#VALUE!	Dynein
																			IPR024317	Dynein heavy chain, AAA module D4	#VALUE!	Dynein
																			IPR001372	Dynein light chain, type 1/2	#VALUE!	Dynein
																			IPR041466	Dynein heavy chain, AAA 5 extension domain	#VALUE!	Dynein
																			IPR005334	Dynein light chain Tctex-1 like	#VALUE!	Dynein
																			IPR013594	Dynein heavy chain, tail	#VALUE!	Dynein
																			IPR037177	Dynein light chain superfamily	#VALUE!	Dynein
																			IPR011704	ATPase, dynein-related, AAA domain	#VALUE!	Dynein
																			IPR022780	Dynein family light intermediate chain	#VALUE!	Dynein
																			IPR009991	Dynactin subunit 3	4	dynein
																			IPR008603	Dynactin subunit 4	4	dynein
																			IPR047125	Dynactin subunit 5	4	dynein
																			IPR027777	Dynactin subunit 6	4	dynein
																			IPR042815	Dynein regulatory complex protein 10	#VALUE!	Dynein
																			IPR016561	Dynein light chain roadblock-type 1/2	#VALUE!	Dynein
																			IPR008467	Dynein 1 light intermediate chain	#VALUE!	Dynein
																			IPR027473	L-asparaginase, C-terminal	#VALUE!	glutamate something
